# Supplementary material for: Chemical Barrier Proteins in Human Body Fluids
Source: MDPI journal article supplement (doi:10.3390/biomedicines10071472), 2022-06-22
Supplement: s1 [file s1]

---

## Supplementary material

### Supplementary figure captions:

Figure S1: Interaction network of the chemical barrier proteins in serum. Each circle represents a protein and the lines indicate interactions. The lines with an arrow represent activation, blocking lines represent inhibition, and simple lines represent protein–protein interaction. Line color indicates the type of interaction: green color refers to activation, red color to inhibition, blue color to binding, yellow color to co-expression and purple color to catalysis. The proteins are labeled with their gene name. The identified small clusters are composed of the following proteins: cluster 1: calpains, clusters 2 and 3: disintegrin and metalloproteinase domain-containing proteins, cluster 4: several members of the S100 family, cluster 5: amylases, cluster 6: plastin, gelsolin and drebrin-like protein and cluster 7: carboxypeptidases.

Figure S2: Interaction network of the chemical barrier proteins in tears. Each circle represents a protein and the lines indicate interactions. The lines with an arrow represent activation, blocking lines represent inhibition, and simple lines represent protein–protein interaction. Line color indicates the type of interaction: green color refers to activation, red color to inhibition, blue color to binding, yellow color to co-expression and purple color to catalysis. The proteins are labeled with their gene name. The small clusters are composed of the following proteins: cluster 1: members of the S100 family and peptidoglycan recognition proteins, cluster 2: calpains and other proteases and cluster 3: plastin, gelsolin and drebrin-like protein.

Figure S3: Interaction network of the chemical barrier proteins in saliva. Each circle represents a protein and the lines indicate interactions. The lines with an arrow represent activation, blocking lines represent inhibition, and simple lines represent protein–protein interaction. Line color indicates the type of interaction: green color refers to activation, red color to inhibition, blue color to binding, yellow color to co-expression and purple color to catalysis. The proteins are labeled with their gene name. The small clusters are composed of the following proteins: clusters 1 and 2: members of the S100 family and peptidoglycan recognition proteins, cluster 3: calpains and other pro-teases, cluster 4: plastin, gelsolin and drebrin-like protein, and cluster 5: amylases.

Figure S4: Interaction network of the chemical barrier proteins in nasal secretion. Each circle represents a protein and the lines indicate interactions. The lines with an arrow represent activation, blocking lines represent inhibition, and simple lines represent protein–protein interaction. Line color indicates the type of interaction: green color refers to activation, red color to inhibition, blue color to binding, yellow color to co-expression and purple color to catalysis. The proteins are labeled with their gene name. The minor clusters are composed of the following proteins: clusters 1-2: members of the S100 family and calpains (cluster 2) and cluster 3: beta-hexosaminidases.

Figure S5: Interaction network of the chemical barrier proteins in sweat. Each circle represents a protein and the lines indicate interactions. The lines with an arrow represent activation, blocking lines represent inhibition, and simple lines represent protein–protein interaction. Line color indicates the type of interaction: green color refers to activation, red color to inhibition, blue color to binding, yellow color to co-expression and purple color to catalysis. The proteins are labeled with their gene name. The minor clusters are composed of the following proteins: clusters 1-3: members of the S100 family and peptidoglycan recognition proteins (cluster 1) and cluster 4: protease inhibitors.

Figure S6: Interaction network of the chemical barrier proteins in urine. Each circle represents a protein and the lines indicate interactions. The lines with an arrow represent activation, blocking lines represent inhibition, and simple lines represent protein–protein interaction. Line color indicates the type of interaction: green color refers to activation, red color to inhibition, blue color to binding, yellow color to co-expression and purple color to catalysis. The proteins are labeled with their gene name. The minor clusters are composed of the following proteins: clusters 1-3: members of the S100 family, cluster 2: peptidoglycan recognition proteins, cluster 3: calpains, cluster 4: disintegrin and metalloproteinase domain-containing proteins, cluster 5: plastin, gelsolin and drebrin-like protein and cluster 6: amylases.

Figure S7: Interaction network of the chemical barrier proteins in cervicovaginal fluid. Each circle represents a protein and the lines indicate interactions. The lines with an arrow represent activation, blocking lines represent inhibition, and simple lines represent protein–protein interaction. Line color indicates the type of interaction: green color refers to activation, red color to inhibition, blue color to binding, yellow color to co-expression and purple color to catalysis. The proteins are labeled with their gene name. The minor clusters are composed of the following proteins: clusters 1 and 2: the members of the S100 family, cluster 3: calpains and other proteases, cluster 4: plastin, gelsolin and drebrin-like protein and cluster 5: amylases.

Figure S8: Interaction network of the chemical barrier proteins in the seminal fluid. Each circle represents a protein and the lines indicate interactions. The lines with an arrow represent activation, blocking lines represent inhibition, and simple lines represent protein–protein interaction. Line color indicates the type of interaction: green color refers to activation, red color to inhibition, blue color to binding, yellow color to co-expression and purple color to catalysis. The proteins are labeled with their gene name. The minor clusters are composed of the following proteins: cluster 1: several members of the S100 family, cluster 2: calpains and other proteases, cluster 3: plastin, gelsolin and drebrin-like protein, cluster 4: amylases, cluster 5: disinteg-rin and metalloproteinase domain-containing proteins, and cluster 6: protease enzymes.

Figure S9: Interaction network of the chemical barrier proteins in CSF. Each circle represents a protein and the lines indicate interactions. The lines with an arrow represent activation, blocking lines represent inhibition, and simple lines represent protein–protein interaction. Line color indicates the type of interaction: green color refers to activation, red color to inhibition, blue color to binding, yellow color to co-expression and purple color to catalysis. The proteins are labeled with their gene name. The minor clusters are composed of the following proteins: cluster 1: calpains, cluster 2: members of the S100 family, cluster 3: carboxypeptidases, cluster 4: amylases and cluster 5: gelsolin and drebrin-like protein.

## Supplementary tables:

**Table S1.** Proteins involved in the first line of host defense in serum.

| Protein name                         | UniProt entry | Function                                      | Reference |
|--------------------------------------|---------------|-----------------------------------------------|-----------|
| Acrosin                              | P10323        | Serine protease activity                      | [1]       |
| ADAM DEC1                            | O15204        | Immunomodulatory effect                       | [2]       |
| Alpha-1-acid glycoprotein 1          | P02763        | Immunomodulatory effect                       | [3]       |
| Alpha-1-acid glycoprotein 2          | P19652        | Immunomodulatory effect                       | [3]       |
| Alpha-1-antichymotrypsin             | P01011        | Protease inhibitor                            | [4]       |
| Alpha-1-antitrypsin                  | P01009        | Protease inhibitor                            | [5]       |
| Alpha-1B-glycoprotein                | P04217        | Immunomodulatory effect                       | [6]       |
| Alpha-2-antiplasmin                  | P08697        | Protease inhibitor                            | [7]       |
| Alpha-2-HS-glycoprotein              | P02765        | Anti-inflammatory effect                      | [8]       |
| Alpha-2-macroglobulin                | P01023        | Protease inhibitor                            | [9]       |
| Alpha-2-macroglobulin-like protein 1 | A8K2U0        | Protease inhibitor                            | [10]      |
| Alpha-amylase 1A                     | P0DUB6        | Regulation of biofilm formation               | [11]      |
| Alpha-amylase 1B                     | P0DTE7        | Regulation of biofilm formation               | [11]      |
| Alpha-amylase 1C                     | P0DTE8        | Regulation of biofilm formation               | [11]      |
| Alpha-amylase 2B                     | P19961        | Regulation of biofilm formation               | [11]      |
| Aminopeptidase B                     | Q9H4A4        | Exopeptidase activity                         | [12]      |
| Aminopeptidase N                     | P15144        | Exopeptidase activity                         | [13]      |
| Aminopeptidase O                     | Q8N6M6        | Exopeptidase activity                         | [14]      |
| Amyloid-beta precursor protein       | P05067        | Antimicrobial activity                        | [15]      |
| Angiogenin                           | P03950        | Antimicrobial activity                        | [16]      |
| Antileukoproteinase                  | P03973        | Protease inhibitor<br>Immunomodulatory effect | [17,18]   |
| Antithrombin-III                     | P01008        | Protease inhibitor                            | [19]      |

---

|                                              |        |                                                   |         |
|----------------------------------------------|--------|---------------------------------------------------|---------|
| Apolipoprotein A-I                           | P02647 | Antimicrobial activity                            | [20]    |
| Apolipoprotein A-II                          | P02652 | Immunomodulatory effect                           | [21]    |
| Apolipoprotein A-IV                          | P06727 | Immunomodulatory effect                           | [22]    |
| Apolipoprotein B-100                         | P04114 | Antimicrobial activity                            | [23]    |
| Apolipoprotein C-III                         | P02656 | Immunomodulatory effect                           | [24]    |
| Apolipoprotein C-IV                          | P55056 | Immunomodulatory effect                           | [25]    |
| Apolipoprotein D                             | P05090 | Immunomodulatory effect                           | [26]    |
| Apolipoprotein E                             | P02649 | Immunomodulatory effect                           | [27]    |
| Apolipoprotein L1                            | O14791 | Immunomodulatory effect                           | [28]    |
| Apolipoprotein M                             | O95445 | Immunomodulatory effect                           | [29]    |
| Arginase-1                                   | P05089 | Antifungal activity<br>Immunomodulatory effect    | [30,31] |
| Aspartyl aminopeptidase                      | Q9ULA0 | Exopeptidase activity                             | [32]    |
| Azurocidin                                   | P20160 | Antimicrobial activity                            | [33]    |
| Bactericidal permeability-increasing protein | P17213 | Antimicrobial activity                            | [33,34] |
| Beta-2-glycoprotein 1                        | P02749 | Immunomodulatory effect                           | [35]    |
| Beta-2-microglobulin                         | P61769 | Antimicrobial activity<br>Immunomodulatory effect | [36,37] |
| Beta-Ala-His dipeptidase                     | Q96KN2 | Carboxypeptidase activity                         | [38]    |
| Beta-defensin 1                              | P60022 | Antimicrobial activity                            | [33]    |
| Beta-defensin 118                            | Q96PH6 | Antimicrobial activity                            | [33]    |
| Beta-defensin 126                            | Q9BYW3 | Antimicrobial activity                            | [33]    |
| Beta-defensin 129                            | Q9H1M3 | Antimicrobial activity                            | [33]    |
| Beta-defensin 132                            | Q7Z7B7 | Antimicrobial activity                            | [33]    |
| Beta-defensin 4A                             | O15263 | Antimicrobial activity                            | [33]    |
| Beta-hexosaminidase subunit alpha            | P06865 | Antimicrobial activity                            | [39]    |
| Beta-hexosaminidase subunit beta             | P07686 | Antimicrobial activity                            | [39]    |
| Bone marrow stromal antigen 2                | Q10589 | Antiviral effect                                  | [40]    |
| BPI fold-containing family A member 1        | Q9NP55 | Antimicrobial activity                            | [41]    |
| BPI fold-containing family A member 2        | Q96DR5 | Antimicrobial activity                            | [42]    |
| BPI fold-containing family A member 3        | Q9BQP9 | Antimicrobial activity                            | [43]    |
| BPI fold-containing family B member 1        | Q8TDL5 | Antimicrobial activity                            | [44]    |
| BPI fold-containing family B member 2        | Q8N4F0 | Antimicrobial activity                            | [44]    |
| BPI fold-containing family B member 3        | P59826 | Antimicrobial activity                            | [45]    |
| BPI fold-containing family B member 4        | P59827 | Antimicrobial activity                            | [46]    |
| Brain-specific serine protease 4             | Q9GZN4 | Serine protease activity                          | [47]    |
| Calcitonin gene-related peptide 1            | P06881 | Antimicrobial activity                            | [48]    |
| Calpain-1 catalytic subunit                  | P07384 | Endopeptidase activity<br>Immunomodulatory effect | [49]    |
| Calpain-10                                   | Q9HC96 | Endopeptidase activity<br>Immunomodulatory effect | [49]    |
| Calpain-11                                   | Q9UMQ6 | Endopeptidase activity<br>Immunomodulatory effect | [49]    |
| Calpain-12                                   | Q6ZSI9 | Endopeptidase activity<br>Immunomodulatory effect | [49]    |

---

|                                                              |        |                                                   |      |
|--------------------------------------------------------------|--------|---------------------------------------------------|------|
| Calpain-13                                                   | Q6MZZ7 | Endopeptidase activity<br>Immunomodulatory effect | [49] |
| Calpain-2 catalytic subunit                                  | P17655 | Endopeptidase activity<br>Immunomodulatory effect | [49] |
| Calpain-3                                                    | P20807 | Endopeptidase activity<br>Immunomodulatory effect | [49] |
| Calpain-5                                                    | O15484 | Endopeptidase activity<br>Immunomodulatory effect | [49] |
| Calpain-6                                                    | Q9Y6Q1 | Endopeptidase activity<br>Immunomodulatory effect | [49] |
| Calpain-7                                                    | Q9Y6W3 | Endopeptidase activity<br>Immunomodulatory effect | [49] |
| Calpain-8                                                    | A6NHC0 | Endopeptidase activity<br>Immunomodulatory effect | [49] |
| Calpain-9                                                    | O14815 | Endopeptidase activity<br>Immunomodulatory effect | [49] |
| Calpastatin                                                  | P20810 | Protease inhibitor                                | [50] |
| Carboxypeptidase A1                                          | P15085 | Carboxypeptidase activity                         | [51] |
| Carboxypeptidase A2                                          | P48052 | Carboxypeptidase activity                         | [51] |
| Carboxypeptidase A4                                          | Q9UI42 | Carboxypeptidase activity                         | [51] |
| Carboxypeptidase A5                                          | Q8WXQ8 | Carboxypeptidase activity                         | [51] |
| Carboxypeptidase A6                                          | Q8N4T0 | Carboxypeptidase activity                         | [51] |
| Carboxypeptidase B                                           | P15086 | Carboxypeptidase activity                         | [52] |
| Carboxypeptidase B2                                          | Q96IY4 | Carboxypeptidase activity                         | [52] |
| Carboxypeptidase D                                           | O75976 | Carboxypeptidase activity                         | [53] |
| Carboxypeptidase E                                           | P16870 | Carboxypeptidase activity                         | [53] |
| Carboxypeptidase M                                           | P14384 | Carboxypeptidase activity                         | [54] |
| Carboxypeptidase N catalytic chain                           | P15169 | Carboxypeptidase activity                         | [55] |
| Carboxypeptidase Q                                           | Q9Y646 | Carboxypeptidase activity                         | [56] |
| Carcinoembryonic antigen-related cell<br>adhesion molecule 1 | P13688 | Immunomodulatory effect                           | [57] |
| Carcinoembryonic antigen-related cell<br>adhesion molecule 3 | P40198 | Immunomodulatory effect                           | [58] |
| Catalase                                                     | P04040 | Antimicrobial activity                            | [59] |
| Cathelicidin antimicrobial peptide                           | P49913 | Antimicrobial activity                            | [33] |
| Cathepsin B                                                  | P07858 | Endopeptidase activity                            | [60] |
| Cathepsin D                                                  | P07339 | Endopeptidase activity                            | [60] |
| Cathepsin F                                                  | Q9UBX1 | Endopeptidase activity                            | [60] |
| Cathepsin G                                                  | P08311 | Endopeptidase activity                            | [60] |
| Cathepsin K                                                  | P43235 | Endopeptidase activity                            | [60] |
| Cathepsin L2                                                 | O60911 | Endopeptidase activity                            | [60] |
| Cathepsin O                                                  | P43234 | Endopeptidase activity                            | [60] |
| Cathepsin S                                                  | P25774 | Endopeptidase activity                            | [60] |
| Cathepsin W                                                  | P56202 | Endopeptidase activity                            | [60] |
| Cathepsin Z                                                  | Q9UBR2 | Endopeptidase activity                            | [60] |
| Cell surface glycoprotein MUC18                              | P43121 | Immunomodulatory effect                           | [61] |

|                                                                |        |                                                   |         |
|----------------------------------------------------------------|--------|---------------------------------------------------|---------|
| Ceruloplasmin                                                  | P00450 | Cu <sup>2+</sup> sequestering activity            | [62]    |
| Chitinase-3-like protein 1                                     | P36222 | Antimicrobial activity                            | [63]    |
| Chitotriosidase-1                                              | Q13231 | Antifungal activity                               | [64]    |
| Chromogranin-A                                                 | P10645 | Processed forms have anti-microbial activity      | [65]    |
| Clusterin                                                      | P10909 | Immunomodulatory effect                           | [66]    |
| Collagen alpha-1(XII) chain                                    | Q99715 | Immunomodulatory effect                           | [67]    |
| Core histone macro-H2A.1                                       | O75367 | Antimicrobial activity                            | [68]    |
| Core histone macro-H2A.2                                       | Q9P0M6 | Antimicrobial activity                            | [68]    |
| Corticosteroid-binding globulin                                | P08185 | Protease inhibitor                                | [69]    |
| C-reactive protein                                             | P02741 | Acute phase protein                               | [70]    |
| Cystatin-A                                                     | P01040 | Protease inhibitor                                | [71]    |
| Cystatin-B                                                     | P04080 | Protease inhibitor                                | [71]    |
| Cystatin-C                                                     | P01034 | Protease inhibitor                                | [71]    |
| Cystatin-D                                                     | P28325 | Protease inhibitor                                | [71]    |
| Cystatin-F                                                     | O76096 | Protease inhibitor                                | [71]    |
| Cystatin-M                                                     | Q15828 | Protease inhibitor                                | [71]    |
| Cystatin-S                                                     | P01036 | Protease inhibitor                                | [71]    |
| Cystatin-SA                                                    | P09228 | Protease inhibitor                                | [71]    |
| Cystatin-SN                                                    | P01037 | Protease inhibitor                                | [71]    |
| Cytosol aminopeptidase                                         | P28838 | Aminopeptidase activity                           | [72]    |
| Cytosolic carboxypeptidase 1                                   | Q9UPW5 | Carboxypeptidase activity                         | [73]    |
| Cytosolic carboxypeptidase 3                                   | Q8NEM8 | Carboxypeptidase activity                         | [74]    |
| Cytosolic non-specific dipeptidase                             | Q96KP4 | Carboxypeptidase activity                         | [75]    |
| Defensin-5                                                     | Q01523 | Antimicrobial activity                            | [33]    |
| Defensin-6                                                     | Q01524 | Antimicrobial activity                            | [33]    |
| Deleted in malignant brain tumors 1 protein                    | Q9UGM3 | Immunomodulatory effect<br>Antimicrobial activity | [76,77] |
| Deoxyribonuclease-1                                            | P24855 | Endonuclease activity                             | [78]    |
| Dermcidin                                                      | P81605 | Antimicrobial activity                            | [33]    |
| Dipeptidase 1                                                  | P16444 | Carboxypeptidase activity                         | [79]    |
| Dipeptidase 2                                                  | Q9H4A9 | Carboxypeptidase activity                         | [80]    |
| Dipeptidase 3                                                  | Q9H4B8 | Carboxypeptidase activity                         | [80]    |
| Dipeptidyl peptidase 1                                         | P53634 | Carboxypeptidase activity                         | [81]    |
| Dipeptidyl peptidase 2                                         | Q9UHL4 | Carboxypeptidase activity                         | [82]    |
| Dipeptidyl peptidase 3                                         | Q9NY33 | Carboxypeptidase activity                         | [83]    |
| Dipeptidyl peptidase 4                                         | P27487 | Carboxypeptidase activity                         | [84]    |
| Dipeptidyl peptidase 9                                         | Q86TI2 | Carboxypeptidase activity                         | [85]    |
| Disintegrin and metalloproteinase domain-containing protein 10 | O14672 | Metalloendopeptidase activity                     | [86]    |
| Disintegrin and metalloproteinase domain-containing protein 11 | O75078 | Metalloendopeptidase activity                     | [86]    |
| Disintegrin and metalloproteinase domain-containing protein 12 | O43184 | Metalloendopeptidase activity                     | [86]    |

|                                                                |        |                               |      |
|----------------------------------------------------------------|--------|-------------------------------|------|
| Disintegrin and metalloproteinase domain-containing protein 15 | Q13444 | Metalloendopeptidase activity | [86] |
| Disintegrin and metalloproteinase domain-containing protein 17 | P78536 | Metalloendopeptidase activity | [86] |
| Disintegrin and metalloproteinase domain-containing protein 18 | Q9Y3Q7 | Metalloendopeptidase activity | [86] |
| Disintegrin and metalloproteinase domain-containing protein 19 | Q9H013 | Metalloendopeptidase activity | [86] |
| Disintegrin and metalloproteinase domain-containing protein 2  | Q99965 | Metalloendopeptidase activity | [86] |
| Disintegrin and metalloproteinase domain-containing protein 20 | O43506 | Metalloendopeptidase activity | [86] |
| Disintegrin and metalloproteinase domain-containing protein 22 | Q9P0K1 | Metalloendopeptidase activity | [86] |
| Disintegrin and metalloproteinase domain-containing protein 23 | O75077 | Metalloendopeptidase activity | [86] |
| Disintegrin and metalloproteinase domain-containing protein 28 | Q9UKQ2 | Metalloendopeptidase activity | [86] |
| Disintegrin and metalloproteinase domain-containing protein 29 | Q9UKF5 | Metalloendopeptidase activity | [86] |
| Disintegrin and metalloproteinase domain-containing protein 30 | Q9UKF2 | Metalloendopeptidase activity | [86] |
| Disintegrin and metalloproteinase domain-containing protein 32 | Q8TC27 | Metalloendopeptidase activity | [86] |
| Disintegrin and metalloproteinase domain-containing protein 33 | Q9BZ11 | Metalloendopeptidase activity | [86] |
| Disintegrin and metalloproteinase domain-containing protein 7  | Q9H2U9 | Metalloendopeptidase activity | [86] |
| Disintegrin and metalloproteinase domain-containing protein 8  | P78325 | Metalloendopeptidase activity | [86] |
| Disintegrin and metalloproteinase domain-containing protein 9  | Q13443 | Metalloendopeptidase activity | [86] |
| Drebrin-like protein                                           | Q9UJU6 | Immunomodulatory effect       | [87] |
| Elafin                                                         | P19957 | Protease inhibitor            | [88] |
| Endoplasmic reticulum aminopeptidase 1                         | Q9NZ08 | Aminopeptidase activity       | [89] |
| Endoplasmic reticulum aminopeptidase 2                         | Q6P179 | Aminopeptidase activity       | [89] |
| Eosinophil cationic protein                                    | P12724 | Antimicrobial activity        | [90] |
| Eosinophil peroxidase                                          | P11678 | Antimicrobial activity        | [91] |
| Extracellular glycoprotein lacritin                            | Q9GZZ8 | Antimicrobial activity        | [92] |
| Fatty acid-binding protein 4                                   | P15090 | Immunomodulatory effect       | [93] |
| Fatty acid-binding protein 5                                   | Q01469 | Immunomodulatory effect       | [94] |
| Fibrinogen alpha chain                                         | P02671 | Immunomodulatory effect       | [95] |
| Fibrinogen beta chain                                          | P02675 | Immunomodulatory effect       | [95] |

|                                             |        |                                                                  |           |
|---------------------------------------------|--------|------------------------------------------------------------------|-----------|
| Fibrinogen gamma chain                      | P02679 | Immunomodulatory effect                                          | [95]      |
| Fibrocytin-L                                | Q86WI1 | Immunomodulatory effect                                          | [96]      |
| Fibroleukin                                 | Q14314 | Immunomodulatory effect                                          | [97]      |
| Folliculin-interacting protein 1            | Q8TF40 | Immunomodulatory effect                                          | [98]      |
| Furin                                       | P09958 | Serine protease activity                                         | [99]      |
| FYN-binding protein 1                       | O15117 | Immunomodulatory effect                                          | [100]     |
| Galectin-1                                  | P09382 | Immunomodulatory effect                                          | [101]     |
| Galectin-10                                 | Q05315 | Immunomodulatory effect                                          | [102]     |
| Galectin-3                                  | P17931 | Immunomodulatory effect                                          | [103]     |
| Galectin-3-binding protein                  | Q08380 | Antimicrobial activity<br>Immunomodulatory effect                | [104,105] |
| Galectin-7                                  | P47929 | Immunomodulatory effect                                          | [106]     |
| Galectin-9                                  | O00182 | Immunomodulatory effect                                          | [107]     |
| Gastricsin                                  | P20142 | Aspartic-type endopepti-<br>dase activity                        | [108]     |
| Gelsolin                                    | P06396 | Processed from has antimi-<br>crobial activity                   | [109]     |
| Glia-derived nexin                          | P07093 | Protease inhibitor                                               | [110]     |
| Glucose-6-phosphate isomerase               | P06744 | Induces immunoglobulin<br>secretion                              | [111]     |
| Glutamate carboxypeptidase 2                | Q04609 | Carboxypeptidase activity                                        | [112]     |
| Glutamyl aminopeptidase                     | Q07075 | Aminopeptidase activity                                          | [113]     |
| Glutathione S-transferase omega-1           | P78417 | Immunomodulatory effect                                          | [114]     |
| Glutathione S-transferase P                 | P09211 | Immunomodulatory effect                                          | [115]     |
| Glyceraldehyde-3-phosphate<br>dehydrogenase | P04406 | Immunomodulatory effect                                          | [116]     |
| Granzyme A                                  | P12544 | Serine protease activity                                         | [117]     |
| Granzyme B                                  | P10144 | Serine protease activity                                         | [117]     |
| Granzyme H                                  | P20718 | Serine protease activity                                         | [117]     |
| Granzyme K                                  | P49863 | Serine protease activity                                         | [117]     |
| Granzyme M                                  | P51124 | Serine protease activity                                         | [117]     |
| Growth-regulated alpha protein              | P09341 | Antimicrobial activity                                           | [118]     |
| Guanylate-binding protein 1                 | P32455 | Immunomodulatory effect                                          | [119]     |
| Guanylate-binding protein 2                 | P32456 | Antiviral effect                                                 | [120]     |
| Guanylate-binding protein 4                 | Q96PP9 | Immunomodulatory effect                                          | [119]     |
| Guanylate-binding protein 5                 | Q96PP8 | Immunomodulatory effect                                          | [121]     |
| Haptoglobin                                 | P00738 | Immunomodulatory effect<br>Iron sequestering                     | [122]     |
| Haptoglobin-related protein                 | P00739 | Anti-parasitic effect                                            | [123]     |
| Heme-binding protein 1                      | Q9NRV9 | Heme/iron sequestration                                          | [124]     |
| Heme-binding protein 2                      | Q9Y5Z4 | Heme/iron sequestration                                          | [124]     |
| Hemoglobin subunit alpha                    | P69905 | Processed forms (hemo-<br>cidins) have antimicrobial<br>activity | [125]     |
| Hemoglobin subunit beta                     | P68871 | Processed forms (hemo-<br>cidins) have antimicrobial             | [125]     |

|                                              |        | activity                 |           |
|----------------------------------------------|--------|--------------------------|-----------|
| Hemopexin                                    | P02790 | Antibacterail effect     | [126]     |
| Heparin cofactor 2                           | P05546 | Anti-inflammatory effect |           |
|                                              |        | Protease inhibitor       | [127]     |
| Hepcidin                                     | P81172 | Antimicrobial activity   | [128,129] |
|                                              |        | Iron sequestration       |           |
| High mobility group protein B1               | P09429 | Immunomodulatory effect  | [130]     |
| High mobility group protein B2               | P26583 | Antimicrobial activity   | [131]     |
| High mobility group protein B3               | O15347 | Immunomodulatory effect  | [132]     |
| Histidine-rich glycoprotein                  | P04196 | Antimicrobial activity   | [133]     |
| Histone H1.0                                 | P07305 | Antimicrobial activity   | [134]     |
| Histone H1.1                                 | Q02539 | Antimicrobial activity   | [134]     |
| Histone H1.10                                | Q92522 | Antimicrobial activity   | [134]     |
| Histone H1.2                                 | P16403 | Antimicrobial activity   | [134]     |
| Histone H1.3                                 | P16402 | Antimicrobial activity   | [134]     |
| Histone H1.4                                 | P10412 | Antimicrobial activity   | [134]     |
| Histone H1.5                                 | P16401 | Antimicrobial activity   | [134]     |
| Histone H1t                                  | P22492 | Antimicrobial activity   | [134]     |
| Histone H2A type 1-B/E                       | P04908 | Antimicrobial activity   | [134]     |
| Histone H2A type 2-A                         | Q6FI13 | Antimicrobial activity   | [134]     |
| Histone H2A type 3                           | Q7L7L0 | Antimicrobial activity   | [134]     |
| Histone H2A.Z                                | P0C0S5 | Antimicrobial activity   | [134]     |
| Histone H2AX                                 | P16104 | Antimicrobial activity   | [134]     |
| Histone H2B type 1-A                         | Q96A08 | Antimicrobial activity   | [134]     |
| Histone H2B type 1-B                         | P33778 | Antimicrobial activity   | [134]     |
| Histone H2B type 1-C/E/F/G/I                 | P62807 | Antimicrobial activity   | [134]     |
| Histone H2B type 1-H                         | Q93079 | Antimicrobial activity   | [134]     |
| Histone H2B type 1-K                         | O60814 | Antimicrobial activity   | [134]     |
| Histone H2B type 1-L                         | Q99880 | Antimicrobial activity   | [134]     |
| Histone H3.1                                 | P68431 | Antimicrobial activity   | [134]     |
| Histone H3.2                                 | Q71DI3 | Antimicrobial activity   | [134]     |
| Histone H3.3                                 | P84243 | Antimicrobial activity   | [134]     |
| Histone H3-7                                 | Q5TEC6 | Antimicrobial activity   | [134]     |
| Histone H4                                   | P62805 | Antimicrobial activity   | [134]     |
| Inter-alpha-trypsin inhibitor heavy chain H1 | P19827 | Protease inhibitor       | [135]     |
| Inter-alpha-trypsin inhibitor heavy chain H2 | P19823 | Protease inhibitor       | [135]     |
| Inter-alpha-trypsin inhibitor heavy chain H3 | Q06033 | Protease inhibitor       | [135]     |
| Inter-alpha-trypsin inhibitor heavy chain H4 | Q14624 | Protease inhibitor       | [135]     |
| Inter-alpha-trypsin inhibitor heavy chain H5 | Q86UX2 | Protease inhibitor       | [135]     |
| Inter-alpha-trypsin inhibitor heavy chain H6 | Q6UXX5 | Protease inhibitor       | [135]     |
| Interferon-induced 35 kDa protein            | P80217 | Immunomodulatory effect  | [136]     |
| Interferon-stimulated gene 20 kDa protein    | Q96AZ6 | Antiviral effect         | [137]     |
| Kallikrein-11                                | Q9UBX7 | Serine protease activity | [138]     |
| Kallikrein-12                                | Q9UKR0 | Serine protease activity | [138]     |



|                                         |        |                                                 |           |
|-----------------------------------------|--------|-------------------------------------------------|-----------|
| Kallikrein-13                           | Q9UKR3 | Serine protease activity                        | [138]     |
| Kallikrein-14                           | Q9P0G3 | Serine protease activity                        | [138]     |
| Kallikrein-15                           | Q9H2R5 | Serine protease activity                        | [138]     |
| Kallikrein-2                            | P20151 | Serine protease activity                        | [138]     |
| Kallikrein-3                            | P07288 | Serine protease activity                        | [138]     |
|                                         |        | Serine protease activity                        |           |
| Kallikrein-5                            | Q9Y337 | Processing the maturation of LL-37 cathelicidin | [138,139] |
| Kallikrein-6                            | Q92876 | Serine protease activity                        | [138]     |
|                                         |        | Serine protease activity                        | [138]     |
| Kallikrein-7                            | P49862 | Processing the maturation of LL-37 cathelicidin |           |
| Kallikrein-8                            | O60259 | Serine protease activity                        | [138]     |
| Kininogen-1                             | P01042 | Antimicrobial activity                          | [140,141] |
| Kunitz-type protease inhibitor 1        | O43278 | Protease inhibitor                              | [142]     |
| Kunitz-type protease inhibitor 2        | O43291 | Protease inhibitor                              | [142]     |
| Lactoperoxidase                         | P22079 | Antimicrobial activity                          | [143]     |
| Lactotransferrin                        | P02788 | Antimicrobial activity                          |           |
|                                         |        | Iron sequestration                              | [33]      |
| Legumain                                | Q99538 | Endopeptidase activity                          | [144]     |
| Leukocyte elastase inhibitor            | P30740 | Protease inhibitor                              | [145]     |
| Lipocalin-1                             | P31025 | Immunomodulatory effect                         | [146,147] |
|                                         |        | Iron sequestration                              |           |
| Lipocalin-2                             | P80188 | Immunomodulatory effect                         | [146,147] |
|                                         |        | Iron sequestration                              |           |
| Lipopolysaccharide-binding protein      | P18428 | Immunomodulatory effect                         | [148]     |
| Liver-expressed antimicrobial peptide 2 | Q969E1 | Antimicrobial activity                          | [149]     |
| Lymphotactin                            | P47992 | Antimicrobial activity                          | [150]     |
| Lysozyme C                              | P61626 | Antimicrobial activity                          | [33]      |
| Macrophage migration inhibitory factor  | P14174 | Antimicrobial activity                          | [151]     |
| Major vault protein                     | Q14764 | Immunomodulatory effect                         | [152]     |
| Mammaglobin-B                           | O75556 | Immunomodulatory effect                         | [153]     |
| Mast cell carboxypeptidase A            | P15088 | Carboxypeptidase activity                       | [154]     |
| Matrix metalloproteinase-9              | P14780 | Metalloprotease activity                        | [155]     |
| Melanotransferrin                       | P08582 | Iron sequestration                              | [156]     |
| Metalloproteinase inhibitor 1           | P01033 | Protease Inhibitor                              | [157]     |
| Metalloproteinase inhibitor 2           | P16035 | Protease Inhibitor                              | [157]     |
| Metalloproteinase inhibitor 4           | Q99727 | Protease Inhibitor                              | [157]     |
| Midkine                                 | P21741 | Immunomodulatory effect                         | [158]     |
| Moesin                                  | P26038 | Immunomodulatory effect                         | [159]     |
| Mucin-1                                 | P15941 | Antimicrobial activity                          | [160]     |
| Mucin-13                                | Q9H3R2 | Antimicrobial activity                          | [160]     |
| Mucin-15                                | Q8N387 | Antimicrobial activity                          | [160]     |
| Mucin-16                                | Q8WXI7 | Antimicrobial activity                          | [160]     |

|                                        |        |                                                                      |           |
|----------------------------------------|--------|----------------------------------------------------------------------|-----------|
| Mucin-17                               | Q685J3 | Antimicrobial activity                                               | [160]     |
| Mucin-2                                | Q02817 | Antimicrobial activity                                               | [160]     |
| Mucin-4                                | Q99102 | Antimicrobial activity                                               | [160]     |
| Mucin-5AC                              | P98088 | Antimicrobial activity                                               | [160]     |
| Mucin-5B                               | Q9HC84 | Antimicrobial activity                                               | [160]     |
| Mucin-6                                | Q6W4X9 | Antimicrobial activity                                               | [160]     |
| Mucin-7                                | Q8TAX7 | Antimicrobial activity                                               | [160]     |
| Myeloblastin                           | P24158 | Serine protease activity                                             | [161]     |
| Myeloperoxidase                        | P05164 | Antimicrobial activity                                               | [162]     |
| Myoglobin                              | P02144 | Processed forms (hemo-<br>cidins) have antimicrobial<br>activity     | [163]     |
| N-acetylmuramoyl-L-alanine amidase     | Q96PD5 | Antimicrobial activity                                               | [164]     |
| Neprilysin                             | P08473 | Endopeptidase activity                                               | [165]     |
| Neutrophil collagenase                 | P22894 | Endopeptidase activity<br>Immunomodulatory effect                    | [166]     |
| Neutrophil defensin 1                  | P59665 | Antimicrobial activity                                               | [33]      |
| Neutrophil defensin 3                  | P59666 | Antimicrobial activity                                               | [33]      |
| Neutrophil defensin 4                  | P12838 | Antimicrobial activity                                               | [33]      |
| Neutrophil elastase                    | P08246 | Serine protease activity                                             | [167]     |
| Nicotinamide phosphoribosyltransferase | P43490 | Immunomodulatory effect                                              | [168]     |
| Non-histone chromosomal protein HMG-17 | P05204 | Antimicrobial activity                                               | [169]     |
| Non-secretory ribonuclease             | P10153 | Ribonuclease activity                                                | [170]     |
| Opiorphin prepropeptide                | Q99935 | Protease inhibitor                                                   | [171]     |
| Peptidase inhibitor 16                 | Q6UXB8 | Protease inhibitor                                                   | [172]     |
| Peptidoglycan recognition protein 1    | O75594 | Antimicrobial activity                                               | [173]     |
| Perforin-1                             | P14222 | Antimicrobial activity                                               | [174]     |
| Phospholipase B-like 1                 | Q6P4A8 | Suggested antimicrobial<br>activity                                  | [175]     |
| Pigment epithelium-derived factor      | P36955 | Protease inhibitor                                                   | [176]     |
| Plasma kallikrein                      | P03952 | Serine protease activity                                             | [138]     |
| Plasma serine protease inhibitor       | P05154 | Protease inhibitor                                                   | [177]     |
| Plastin-2                              | P13796 | Immunomodulatory effect                                              | [178]     |
| Poly(rC)-binding protein 1             | Q15365 | Antiviral effect                                                     | [179]     |
| Poly(rC)-binding protein 2             | Q15366 | Antiviral effect                                                     | [180]     |
| Pregnancy zone protein                 | P20742 | Protease inhibitor                                                   | [181]     |
| Pro-adrenomedullin                     | P35318 | Antimicrobial activity<br>Immunomodulatory effect                    | [182,183] |
| Pro-cathepsin H                        | P09668 | Endopeptidase activity                                               | [60]      |
| Procathepsin L                         | P07711 | Endopeptidase activity                                               | [60]      |
| Progranulin                            | P28799 | Immunomodulatory effect<br>Aspartic-type endopepti-<br>dase activity | [184]     |
| Prolactin-inducible protein            | P12273 | Modulates the activity of<br>Zn- $\alpha$ 2 glycoprotein             | [185,186] |
| Proline-rich protein 11                | Q96HE9 | Antimicrobial activity                                               | [187]     |

|                                      |        |                                             |           |
|--------------------------------------|--------|---------------------------------------------|-----------|
| Proline-rich protein 14              | Q9BWN1 | Antimicrobial activity                      | [187]     |
| Proline-rich protein 18              | Q8N4B5 | Antimicrobial activity                      | [187]     |
| Proline-rich protein 30              | Q53SZ7 | Antimicrobial activity                      | [187]     |
| Proline-rich protein 4               | Q16378 | Antimicrobial activity                      | [187]     |
| Proline-rich protein 5               | P85299 | Antimicrobial activity                      | [187]     |
| Prolyl endopeptidase                 | P48147 | Endopeptidase activity                      | [188]     |
| Pro-opiomelanocortin                 | P01189 | Antimicrobial activity                      | [189]     |
| Prosalusin                           | Q8N2E6 | Antimicrobial activity                      | [190]     |
| Prosaposin                           | P07602 | Processed forms has anti-microbial effect   | [191]     |
| Prostasin                            | Q16651 | Serine protease activity                    | [192]     |
| Protein AMBP                         | P02760 | Protease inhibitor                          | [193]     |
| Protein FAM3A                        | P98173 | Antifungal effect                           | [194]     |
| Protein S100-A1                      | P23297 | Immunomodulatory effect                     | [195]     |
| Protein S100-A10                     | P60903 | Immunomodulatory effect                     | [196]     |
| Protein S100-A11                     | P31949 | Immunomodulatory effect                     | [197]     |
| Protein S100-A12                     | P80511 | Immunomodulatory effect                     | [196]     |
| Protein S100-A13                     | Q99584 | Immunomodulatory effect                     | [198]     |
| Protein S100-A14                     | Q9HCY8 | Immunomodulatory effect                     | [199]     |
| Protein S100-A2                      | P29034 | Immunomodulatory effect                     | [200]     |
| Protein S100-A4                      | P26447 | Immunomodulatory effect                     | [196]     |
| Protein S100-A6                      | P06703 | Immunomodulatory effect                     | [201]     |
| Protein S100-A7                      | P31151 | Immunomodulatory effect                     | [196]     |
| Protein S100-A8                      | P05109 | Immunomodulatory effect                     | [196]     |
| Protein S100-A9                      | P06702 | Immunomodulatory effect                     | [196]     |
| Protein S100-B                       | P04271 | Immunomodulatory effect                     | [196]     |
| Protein S100-P                       | P25815 | Immunomodulatory effect                     | [196]     |
| Protein WFDC9                        | Q8NEX5 | Protease inhibitor                          | [202]     |
| Puromycin-sensitive aminopeptidase   | P55786 | Aminopeptidase activity                     | [203]     |
| RelA-associated inhibitor            | Q8WUF5 | Antiviral effect<br>Immunomodulatory effect | [204]     |
| Retroviral-like aspartic protease 1  | Q53RT3 | Aspartic-type endopeptidase activity        | [205]     |
| Ribonuclease 4                       | P34096 | Ribonuclease activity                       | [170]     |
| Ribonuclease 8                       | Q8TDE3 | Ribonuclease activity                       | [170]     |
| Ribonuclease K6                      | Q93091 | Ribonuclease activity                       | [170]     |
| Ribonuclease pancreatic              | P07998 | Ribonuclease activity                       | [170]     |
| Ribonuclease T2                      | O00584 | Ribonuclease activity                       | [170]     |
| Secreted Ly-6/uPAR-related protein 1 | P55000 | Immunomodulatory effect                     | [206]     |
| Secretoglobin family 1D member 2     | O95969 | Immunomodulatory effect                     | [207]     |
| Secretoglobin family 3A member 1     | Q96QR1 | Immunomodulatory effect                     | [208]     |
| Secretoglobin family 3A member 2     | Q96PL1 | Immunomodulatory effect                     | [207]     |
| Semenogelin-1                        | P04279 | Processed forms has anti-microbial activity | [209–211] |
| Semenogelin-2                        | Q02383 | Processed forms has anti-microbial activity | [209–211] |

|                                          |        | icrobial activity        |       |
|------------------------------------------|--------|--------------------------|-------|
| Serine protease 1                        | P07477 | Serine protease activity | [212] |
| Serine protease 23                       | O95084 | Serine protease activity | [212] |
| Serine protease 27                       | Q9BQR3 | Serine protease activity | [212] |
| Serine protease 57                       | Q6UWY2 | Serine protease activity | [212] |
| Serine protease HTRA1                    | Q92743 | Serine protease activity | [212] |
| Serine protease HTRA2                    | O43464 | Serine protease activity | [212] |
| Serine protease HTRA3                    | P83110 | Serine protease activity | [212] |
| Serine protease HTRA4                    | P83105 | Serine protease activity | [212] |
| Serine protease inhibitor Kazal-type 1   | P00995 | Protease inhibitor       | [213] |
| Serine protease inhibitor Kazal-type 5   | Q9NQ38 | Protease inhibitor       | [213] |
| Serine protease inhibitor Kazal-type 6   | Q6UWN8 | Protease inhibitor       | [213] |
| Serine protease inhibitor Kazal-type 7   | P58062 | Protease inhibitor       | [213] |
| Serotransferrin                          | P02787 | Iron sequestration       | [214] |
| Serpin B10                               | P48595 | Protease inhibitor       | [215] |
| Serpin B11                               | Q96P15 | Protease inhibitor       | [215] |
| Serpin B12                               | Q96P63 | Protease inhibitor       | [215] |
| Serpin B13                               | Q9UIV8 | Protease inhibitor       | [215] |
| Serpin B3                                | P29508 | Protease inhibitor       | [215] |
| Serpin B4                                | P48594 | Protease inhibitor       | [215] |
| Serpin B5                                | P36952 | Protease inhibitor       | [215] |
| Serpin B6                                | P35237 | Protease inhibitor       | [215] |
| Serpin B7                                | O75635 | Protease inhibitor       | [215] |
| Serpin B8                                | P50452 | Protease inhibitor       | [215] |
| Serpin B9                                | P50453 | Protease inhibitor       | [215] |
| Serum amyloid A-1 protein                | P0DJI8 | Immunomodulatory effect  | [216] |
| Serum amyloid A-2 protein                | P0DJI9 | Immunomodulatory effect  | [216] |
| Serum amyloid A-4 protein                | P35542 | Immunomodulatory effect  | [216] |
| Serum amyloid P-component                | P02743 | Antiviral effect         | [217] |
| Sialomucin core protein 24               | Q04900 | Immunomodulatory effect  | [218] |
| Small proline-rich protein 3             | Q9UBC9 | Antimicrobial effect     | [187] |
| Syntenin-1                               | O00560 | Immunomodulatory effect  | [219] |
| T-cell immunomodulatory protein          | Q8TB96 | Immunomodulatory effect  | [220] |
| Thioredoxin domain-containing protein 17 | Q9BRA2 | Immunomodulatory effect  | [221] |
| Thymosin beta-10                         | P63313 | Antimicrobial activity   | [222] |
| Thymosin beta-4                          | P62328 | Antimicrobial activity   | [222] |
| Thyroxine-binding globulin               | P05543 | Protease inhibitor       | [223] |
| Toll-interacting protein                 | Q9H0E2 | Immunomodulatory effect  | [224] |
| Transgelin                               | Q01995 | Immunomodulatory effect  | [225] |
| Transgelin-2                             | P37802 | Immunomodulatory effect  | [226] |
| Transmembrane protease serine 11A        | Q6ZMR5 | Serine protease activity | [227] |
| Transmembrane protease serine 11D        | O60235 | Serine protease activity | [228] |
| Transmembrane protease serine 11E        | Q9UL52 | Serine protease activity | [229] |
| Triokinase/FMN cyclase                   | Q3LXA3 | Immunomodulatory effect  | [230] |

|                                                                        |        |                           |           |
|------------------------------------------------------------------------|--------|---------------------------|-----------|
| Tripeptidyl-peptidase 1                                                | O14773 | Serine protease activity  | [231]     |
| Tripeptidyl-peptidase 2                                                | P29144 | Serine protease activity  | [232]     |
| Trypsin-2                                                              | P07478 | Serine protease activity  | [233]     |
| Trypsin-3                                                              | P35030 | Serine protease activity  | [234]     |
| Tryptase alpha/beta-1                                                  | Q15661 | Serine protease activity  | [235]     |
| Tryptase beta-2                                                        | P20231 | Serine protease activity  | [234]     |
| Tryptase delta                                                         | Q9BZJ3 | Serine protease activity  | [234]     |
| Uromodulin                                                             | P07911 | Antimicrobial activity    | [236,237] |
| Uteroglobin                                                            | P11684 | Immunomodulatory effect   | [238]     |
| Vitamin D-binding protein                                              | P02774 | Immunomodulatory effect   | [239]     |
| WAP four-disulfide core domain protein 1                               | Q9HC57 | Protease inhibitor        | [240]     |
| WAP four-disulfide core domain protein 2                               | Q14508 | Protease inhibitor        | [240]     |
| WAP four-disulfide core domain protein 6                               | Q9BQY6 | Protease inhibitor        | [240]     |
| WAP four-disulfide core domain protein 8                               | Q8IUA0 | Protease inhibitor        | [240]     |
| WAP, Kazal, immunoglobulin, Kunitz and NTR domain-containing protein 2 | Q8TEU8 | Protease inhibitor        | [240]     |
| Xaa-Pro aminopeptidase 1                                               | Q9NQW7 | Aminopeptidase activity   | [241]     |
| Xaa-Pro aminopeptidase 2                                               | O43895 | Aminopeptidase activity   | [241]     |
| Xaa-Pro dipeptidase                                                    | P12955 | Carboxypeptidase activity | [242]     |
| Zinc-alpha-2-glycoprotein                                              | P25311 | Immunomodulatory effect   | [243]     |
| Zymogen granule membrane protein 16                                    | O60844 | Antimicrobial activity    | [244]     |
| Zymogen granule protein 16 homolog B                                   | Q96DA0 | Antimicrobial activity    | [245]     |

**Table S2.** Proteins involved in the first line of host defense in tears.

| Protein name                   | UniProt entry | Function                        | Reference |
|--------------------------------|---------------|---------------------------------|-----------|
| Alpha-1-acid glycoprotein 1    | P02763        | Immunomodulatory effect         | [3]       |
| Alpha-1-acid glycoprotein 2    | P19652        | Immunomodulatory effect         | [3]       |
| Alpha-1-antichymotrypsin       | P01011        | Protease inhibitor              | [4]       |
| Alpha-1-antitrypsin            | P01009        | Protease inhibitor              | [5]       |
| Alpha-1B-glycoprotein          | P04217        | Immunomodulatory effect         | [6]       |
| Alpha-2-antiplasmin            | P08697        | Protease inhibitor              | [7]       |
| Alpha-2-HS-glycoprotein        | P02765        | Anti-inflammatory effect        | [8]       |
| Alpha-amylase 1A               | P0DUB6        | Regulation of biofilm formation | [11]      |
| Alpha-amylase 1B               | P0DTE7        | Regulation of biofilm formation | [11]      |
| Alpha-amylase 1C               | P0DTE8        | Regulation of biofilm formation | [11]      |
| Aminopeptidase B               | Q9H4A4        | Exopeptidase activity           | [12]      |
| Aminopeptidase N               | P15144        | Exopeptidase activity           | [13]      |
| Amyloid-beta precursor protein | P05067        | Antimicrobial activity          | [15]      |
| Angiogenin                     | P03950        | Antimicrobial activity          | [16]      |

|                                                              |        |                                                   |         |
|--------------------------------------------------------------|--------|---------------------------------------------------|---------|
| Antileukoproteinase                                          | P03973 | Protease inhibitor<br>Immunomodulatory effect     | [17,18] |
| Antithrombin-III                                             | P01008 | Protease inhibitor                                | [19]    |
| Apolipoprotein A-I                                           | P02647 | Antimicrobial activity                            | [20]    |
| Apolipoprotein A-II                                          | P02652 | Immunomodulatory effect                           | [21]    |
| Apolipoprotein A-IV                                          | P06727 | Immunomodulatory effect                           | [22]    |
| Apolipoprotein B-100                                         | P04114 | Antimicrobial activity                            | [23]    |
| Apolipoprotein C-III                                         | P02656 | Immunomodulatory effect                           | [24]    |
| Apolipoprotein D                                             | P05090 | Immunomodulatory effect                           | [26]    |
| Apolipoprotein E                                             | P02649 | Immunomodulatory effect                           | [27]    |
| Apolipoprotein L1                                            | O14791 | Immunomodulatory effect                           | [28]    |
| Arginase-1                                                   | P05089 | Antifungal activity<br>Immunomodulatory effect    | [30,31] |
| Aspartyl aminopeptidase                                      | Q9ULA0 | Exopeptidase activity                             | [32]    |
| Azurocidin                                                   | P20160 | Antimicrobial activity                            | [33]    |
| Bactericidal permeability-increasing protein                 | P17213 | Antimicrobial activity                            | [33,34] |
| Beta-2-glycoprotein 1                                        | P02749 | Immunomodulatory effect                           | [35]    |
| Beta-2-microglobulin                                         | P61769 | Antimicrobial activity<br>Immunomodulatory effect | [36,37] |
| Beta-hexosaminidase subunit alpha                            | P06865 | Antimicrobial activity                            | [39]    |
| Beta-hexosaminidase subunit beta                             | P07686 | Antimicrobial activity                            | [39]    |
| BPI fold-containing family B member 2                        | Q8N4F0 | Antimicrobial activity                            | [44]    |
| Calcitonin gene-related peptide 1                            | P06881 | Antimicrobial activity                            | [48]    |
| Calpain-1 catalytic subunit                                  | P07384 | Endopeptidase activity<br>Immunomodulatory effect | [49]    |
| Calpain-13                                                   | Q6MZZ7 | Endopeptidase activity<br>Immunomodulatory effect | [49]    |
| Calpain-2 catalytic subunit                                  | P17655 | Endopeptidase activity<br>Immunomodulatory effect | [49]    |
| Calpain-7                                                    | Q9Y6W3 | Endopeptidase activity<br>Immunomodulatory effect | [49]    |
| Calpastatin                                                  | P20810 | Protease inhibitor                                | [50]    |
| Carboxypeptidase B2                                          | Q96IY4 | Carboxypeptidase activity                         | [52]    |
| Carboxypeptidase D                                           | O75976 | Carboxypeptidase activity                         | [53]    |
| Carboxypeptidase Q                                           | Q9Y646 | Carboxypeptidase activity                         | [56]    |
| Carcinoembryonic antigen-related cell<br>adhesion molecule 1 | P13688 | Immunomodulatory effect                           | [57]    |
| Catalase                                                     | P04040 | Antimicrobial activity                            | [59]    |
| Cathelicidin antimicrobial peptide                           | P49913 | Antimicrobial activity                            | [33]    |
| Cathepsin B                                                  | P07858 | Endopeptidase activity                            | [60]    |
| Cathepsin D                                                  | P07339 | Endopeptidase activity                            | [60]    |
| Cathepsin F                                                  | Q9UBX1 | Endopeptidase activity                            | [60]    |
| Cathepsin G                                                  | P08311 | Endopeptidase activity                            | [60]    |
| Cathepsin S                                                  | P25774 | Endopeptidase activity                            | [60]    |
| Cathepsin Z                                                  | Q9UBR2 | Endopeptidase activity                            | [60]    |
| Ceruloplasmin                                                | P00450 | Cu <sup>2+</sup> sequestering activity            | [62]    |

|                                                                |        |                                                   |           |
|----------------------------------------------------------------|--------|---------------------------------------------------|-----------|
| Clusterin                                                      | P10909 | Immunomodulatory effect                           | [66]      |
| Corticosteroid-binding globulin                                | P08185 | Protease inhibitor                                | [69]      |
| Cystatin-B                                                     | P04080 | Protease inhibitor                                | [71]      |
| Cystatin-C                                                     | P01034 | Protease inhibitor                                | [71]      |
| Cystatin-D                                                     | P28325 | Protease inhibitor                                | [71]      |
| Cystatin-S                                                     | P01036 | Protease inhibitor                                | [71]      |
| Cystatin-SA                                                    | P09228 | Protease inhibitor                                | [71]      |
| Cystatin-SN                                                    | P01037 | Protease inhibitor                                | [71]      |
| Cytosol aminopeptidase                                         | P28838 | Aminopeptidase activity                           | [72]      |
| Cytosolic non-specific dipeptidase                             | Q96KP4 | Carboxypeptidase activity                         | [75]      |
| Deleted in malignant brain tumors 1 protein                    | Q9UGM3 | Immunomodulatory effect<br>Antimicrobial activity | [76,77]   |
| Dermcidin                                                      | P81605 | Antimicrobial activity                            | [33]      |
| Dipeptidyl peptidase 1                                         | P53634 | Carboxypeptidase activity                         | [81]      |
| Dipeptidyl peptidase 2                                         | Q9UHL4 | Carboxypeptidase activity                         | [82]      |
| Dipeptidyl peptidase 3                                         | Q9NY33 | Carboxypeptidase activity                         | [83]      |
| Dipeptidyl peptidase 4                                         | P27487 | Carboxypeptidase activity                         | [84]      |
| Disintegrin and metalloproteinase domain-containing protein 10 | O14672 | Metalloendopeptidase activity                     | [86]      |
| Drebrin-like protein                                           | Q9UJU6 | Immunomodulatory effect                           | [87]      |
| Endoplasmic reticulum aminopeptidase 1                         | Q9NZ08 | Aminopeptidase activity                           | [89]      |
| Eosinophil cationic protein                                    | P12724 | Antimicrobial activity                            | [90]      |
| Extracellular glycoprotein lacritin                            | Q9GZZ8 | Antimicrobial activity                            | [92]      |
| Fatty acid-binding protein 5                                   | Q01469 | Immunomodulatory effect                           | [94]      |
| FAU ubiquitin-like and ribosomal protein S30                   | P62861 | Antimicrobial activity                            | [95]      |
| Fibrinogen alpha chain                                         | P02671 | Immunomodulatory effect                           | [95]      |
| Fibrinogen beta chain                                          | P02675 | Immunomodulatory effect                           | [95]      |
| Fibrinogen gamma chain                                         | P02679 | Immunomodulatory effect                           | [95]      |
| Furin                                                          | P09958 | Serine protease activity                          | [99]      |
| Galectin-3                                                     | P17931 | Immunomodulatory effect                           | [103]     |
| Galectin-3-binding protein                                     | Q08380 | Antimicrobial activity<br>Immunomodulatory effect | [104,105] |
| Galectin-7                                                     | P47929 | Immunomodulatory effect                           | [106]     |
| Gelsolin                                                       | P06396 | Processed from has antimicrobial activity         | [109]     |
| Glucose-6-phosphate isomerase                                  | P06744 | Induces immunoglobulin secretion                  | [111]     |
| Glutamate carboxypeptidase 2                                   | Q04609 | Carboxypeptidase activity                         | [112]     |
| Glutathione S-transferase omega-1                              | P78417 | Immunomodulatory effect                           | [114]     |
| Glutathione S-transferase P                                    | P09211 | Immunomodulatory effect                           | [115]     |
| Glyceraldehyde-3-phosphate dehydrogenase                       | P04406 | Immunomodulatory effect                           | [116]     |
| Growth-regulated alpha protein                                 | P09341 | Antimicrobial activity                            | [118]     |
| Guanylate-binding protein 1                                    | P32455 | Immunomodulatory effect                           | [119]     |

|                                              |        |                                                           |           |
|----------------------------------------------|--------|-----------------------------------------------------------|-----------|
| Guanylate-binding protein 2                  | P32456 | Antiviral effect                                          | [120]     |
| Haptoglobin                                  | P00738 | Immunomodulatory effect                                   | [122]     |
| Haptoglobin-related protein                  | P00739 | Iron sequestering                                         | [123]     |
| Heme-binding protein 1                       | Q9NRV9 | Anti-parasitic effect                                     | [124]     |
| Heme-binding protein 2                       | Q9Y5Z4 | Heme/iron sequestration                                   | [124]     |
| Hemoglobin subunit alpha                     | P69905 | Processed forms (hemo-cidins) have antimicrobial activity | [125]     |
| Hemoglobin subunit beta                      | P68871 | Processed forms (hemo-cidins) have antimicrobial activity | [125]     |
| Hemopexin                                    | P02790 | Antibacterail effect                                      | [126]     |
| Heparin cofactor 2                           | P05546 | Anti-inflammatory effect                                  | [127]     |
| Heparin cofactor 2                           | P05546 | Protease inhibitor                                        | [127]     |
| High mobility group protein B1               | P09429 | Immunomodulatory effect                                   | [130]     |
| Histatin-1                                   | P15515 | Antimicrobial activity                                    | [246]     |
| Histidine-rich glycoprotein                  | P04196 | Antimicrobial activity                                    | [133]     |
| Histone H1.2                                 | P16403 | Antimicrobial activity                                    | [134]     |
| Histone H1.5                                 | P16401 | Antimicrobial activity                                    | [134]     |
| Histone H2B type 3-B                         | Q8N257 | Antimicrobial activity                                    | [134]     |
| Histone H4                                   | P62805 | Antimicrobial activity                                    | [134]     |
| Inter-alpha-trypsin inhibitor heavy chain H1 | P19827 | Protease inhibitor                                        | [135]     |
| Inter-alpha-trypsin inhibitor heavy chain H2 | P19823 | Protease inhibitor                                        | [135]     |
| Inter-alpha-trypsin inhibitor heavy chain H3 | Q06033 | Protease inhibitor                                        | [135]     |
| Inter-alpha-trypsin inhibitor heavy chain H4 | Q14624 | Protease inhibitor                                        | [135]     |
| Interferon-stimulated gene 20 kDa protein    | Q96AZ6 | Antiviral effect                                          | [137]     |
| Kininogen-1                                  | P01042 | Antimicrobial activity                                    | [140,141] |
| Kunitz-type protease inhibitor 1             | O43278 | Protease inhibitor                                        | [142]     |
| Lactoperoxidase                              | P22079 | Antimicrobial activity                                    | [143]     |
| Lactotransferrin                             | P02788 | Antimicrobial activity                                    | [33]      |
| Legumain                                     | Q99538 | Iron sequestration                                        | [144]     |
| Leukocyte elastase inhibitor                 | Q99538 | Endopeptidase activity                                    | [144]     |
| Lipocalin-1                                  | P30740 | Protease inhibitor                                        | [145]     |
| Lipocalin-1                                  | P31025 | Immunomodulatory effect                                   | [146,147] |
| Lipocalin-1                                  | P31025 | Iron sequestration                                        | [146,147] |
| Lipocalin-2                                  | P80188 | Immunomodulatory effect                                   | [146,147] |
| Lipocalin-2                                  | P80188 | Iron sequestration                                        | [146,147] |
| Lysozyme C                                   | P61626 | Antimicrobial activity                                    | [33]      |
| Macrophage migration inhibitory factor       | P14174 | Antimicrobial activity                                    | [151]     |
| Major vault protein                          | Q14764 | Antimicrobial activity                                    | [152]     |
| Mammaglobin-B                                | Q14764 | Immunomodulatory effect                                   | [152]     |
| Mammaglobin-B                                | O75556 | Immunomodulatory effect                                   | [153]     |
| Matrix metalloproteinase-9                   | P14780 | Metalloprotease activity                                  | [155]     |
| Melanotransferrin                            | P08582 | Iron sequestration                                        | [156]     |
| Metalloproteinase inhibitor 1                | P01033 | Protease Inhibitor                                        | [157]     |
| Metalloproteinase inhibitor 2                | P16035 | Protease Inhibitor                                        | [157]     |



|                                        |        |                                                                                               |           |
|----------------------------------------|--------|-----------------------------------------------------------------------------------------------|-----------|
| Moesin                                 | P26038 | Immunomodulatory effect                                                                       | [159]     |
| Mucin-1                                | P15941 | Antimicrobial activity                                                                        | [160]     |
| Mucin-16                               | Q8WXI7 | Antimicrobial activity                                                                        | [160]     |
| Mucin-4                                | Q99102 | Antimicrobial activity                                                                        | [160]     |
| Mucin-5AC                              | P98088 | Antimicrobial activity                                                                        | [160]     |
| Mucin-7                                | Q8TAX7 | Antimicrobial activity                                                                        | [160]     |
| Myeloblastin                           | P24158 | Serine protease activity                                                                      | [161]     |
| Myeloperoxidase                        | P05164 | Antimicrobial activity                                                                        | [162]     |
| Myoglobin                              | P02144 | Processed forms (hemo-cidins) have antimicrobial activity                                     | [163]     |
| N-acetylmuramoyl-L-alanine amidase     | Q96PD5 | Antimicrobial activity                                                                        | [164]     |
| Neutrophil defensin 1                  | P59665 | Antimicrobial activity                                                                        | [33]      |
| Neutrophil defensin 3                  | P59666 | Antimicrobial activity                                                                        | [33]      |
| Neutrophil elastase                    | P08246 | Serine protease activity                                                                      | [167]     |
| Nicotinamide phosphoribosyltransferase | P43490 | Immunomodulatory effect                                                                       | [168]     |
| Opiorphin prepropeptide                | Q99935 | Protease inhibitor                                                                            | [171]     |
| Peptidoglycan recognition protein 1    | O75594 | Antimicrobial activity                                                                        | [173]     |
| Peptidoglycan recognition protein 3    | Q96LB9 | Antimicrobial activity                                                                        | [173]     |
| Pigment epithelium-derived factor      | P36955 | Protease inhibitor                                                                            | [176]     |
| Plasma kallikrein                      | P03952 | Serine protease activity                                                                      | [138]     |
| Plasma serine protease inhibitor       | P05154 | Protease inhibitor                                                                            | [177]     |
| Plastin-2                              | P13796 | Immunomodulatory effect                                                                       | [178]     |
| Poly(rC)-binding protein 1             | Q15365 | Antiviral effect                                                                              | [179]     |
| Poly(rC)-binding protein 2             | Q15366 | Antiviral effect                                                                              | [180]     |
| Pro-cathepsin H                        | P09668 | Endopeptidase activity                                                                        | [60]      |
| Procathepsin L                         | P07711 | Endopeptidase activity                                                                        | [60]      |
| Progranulin                            | P28799 | Immunomodulatory effect                                                                       | [184]     |
| Prolactin-inducible protein            | P12273 | Aspartic-type endopeptidase activity<br>Modulates the activity of Zn- $\alpha$ 2 glycoprotein | [185,186] |
| Proline-rich protein 27                | Q6MZM9 | Antimicrobial activity                                                                        | [187]     |
| Proline-rich protein 4                 | Q16378 | Antimicrobial activity                                                                        | [187]     |
| Prolyl endopeptidase                   | P48147 | Endopeptidase activity                                                                        | [188]     |
| Prosaposin                             | P07602 | Processed forms has antimicrobial effect                                                      | [191]     |
| Prostasin                              | Q16651 | Serine protease activity                                                                      | [192]     |
| Protein AMBP                           | P02760 | Protease inhibitor                                                                            | [193]     |
| Protein S100-A11                       | P31949 | Immunomodulatory effect                                                                       | [197]     |
| Protein S100-A13                       | Q99584 | Immunomodulatory effect                                                                       | [198]     |
| Protein S100-A4                        | P26447 | Immunomodulatory effect                                                                       | [196]     |
| Protein S100-A6                        | P06703 | Immunomodulatory effect                                                                       | [201]     |
| Protein S100-A7                        | P31151 | Immunomodulatory effect                                                                       | [196]     |
| Protein S100-A8                        | P05109 | Immunomodulatory effect                                                                       | [196]     |

|                                          |        |                                             |       |
|------------------------------------------|--------|---------------------------------------------|-------|
| Protein S100-A9                          | P06702 | Immunomodulatory effect                     | [196] |
| Protein S100-P                           | P25815 | Immunomodulatory effect                     | [196] |
| Puromycin-sensitive aminopeptidase       | P55786 | Aminopeptidase activity                     | [203] |
| RelA-associated inhibitor                | Q8WUF5 | Antiviral effect<br>Immunomodulatory effect | [204] |
| Retroviral-like aspartic protease 1      | Q53RT3 | Aspartic-type endopeptidase activity        | [205] |
| Ribonuclease 4                           | P34096 | Ribonuclease activity                       | [170] |
| Ribonuclease T2                          | O00584 | Ribonuclease activity                       | [170] |
| Secretoglobin family 1D member 1         | O95968 | Immunomodulatory effect                     | [207] |
| Secretoglobin family 1D member 2         | O95969 | Immunomodulatory effect                     | [207] |
| Serine protease 1                        | P07477 | Serine protease activity                    | [212] |
| Serine protease HTRA1                    | Q92743 | Serine protease activity                    | [212] |
| Serotransferrin                          | P02787 | Iron sequestration                          | [214] |
| Serpin B3                                | P29508 | Protease inhibitor                          | [215] |
| Serpin B5                                | P36952 | Protease inhibitor                          | [215] |
| Serpin B6                                | P35237 | Protease inhibitor                          | [215] |
| Serum amyloid P-component                | P02743 | Antiviral effect                            | [217] |
| Small proline-rich protein 3             | Q9UBC9 | Antimicrobial effect                        | [187] |
| Syntenin-1                               | O00560 | Immunomodulatory effect                     | [219] |
| Thioredoxin domain-containing protein 17 | Q9BRA2 | Immunomodulatory effect                     | [221] |
| Thyroxine-binding globulin               | P05543 | Protease inhibitor                          | [223] |
| Toll-interacting protein                 | Q9H0E2 | Immunomodulatory effect                     | [224] |
| Transgelin-2                             | P37802 | Immunomodulatory effect                     | [226] |
| Triokinase/FMN cyclase                   | Q3LXA3 | Immunomodulatory effect                     | [230] |
| Tripeptidyl-peptidase 1                  | O14773 | Serine protease activity                    | [231] |
| Tripeptidyl-peptidase 2                  | P29144 | Serine protease activity                    | [232] |
| Vitamin D-binding protein                | P02774 | Immunomodulatory effect                     | [239] |
| WAP four-disulfide core domain protein 2 | Q14508 | Protease inhibitor                          | [240] |
| Xaa-Pro aminopeptidase 1                 | Q9NQW7 | Aminopeptidase activity                     | [241] |
| Xaa-Pro dipeptidase                      | P12955 | Carboxypeptidase activity                   | [242] |
| Zinc-alpha-2-glycoprotein                | P25311 | Immunomodulatory effect                     | [243] |
| Zymogen granule membrane protein 16      | O60844 | Antimicrobial activity                      | [244] |
| Zymogen granule protein 16 homolog B     | Q96DA0 | Antimicrobial activity                      | [245] |

**Table S3.** Proteins involved in the first line of host defense in saliva.

| Protein name                | UniProt entry | Function                | Reference |
|-----------------------------|---------------|-------------------------|-----------|
| Alpha-1-acid glycoprotein 1 | P02763        | Immunomodulatory effect | [3]       |
| Alpha-1-acid glycoprotein 2 | P19652        | Immunomodulatory effect | [3]       |
| Alpha-1-antichymotrypsin    | P01011        | Protease inhibitor      | [4]       |
| Alpha-1-antitrypsin         | P01009        | Protease inhibitor      | [5]       |
| Alpha-1B-glycoprotein       | P04217        | Immunomodulatory effect | [6]       |
| Alpha-2-antiplasmin         | P08697        | Protease inhibitor      | [7]       |

|                                              |        |                                                   |         |
|----------------------------------------------|--------|---------------------------------------------------|---------|
| Alpha-2-HS-glycoprotein                      | P02765 | Anti-inflammatory effect                          | [8]     |
| Alpha-2-macroglobulin                        | P01023 | Protease inhibitor                                | [9]     |
| Alpha-2-macroglobulin-like protein 1         | A8K2U0 | Protease inhibitor                                | [10]    |
| Alpha-amylase 1A                             | P0DUB6 | Regulation of biofilm formation                   | [11]    |
| Alpha-amylase 1B                             | P0DTE7 | Regulation of biofilm formation                   | [11]    |
| Alpha-amylase 1C                             | P0DTE8 | Regulation of biofilm formation                   | [11]    |
| Alpha-amylase 2B                             | P19961 | Regulation of biofilm formation                   | [11]    |
| Aminopeptidase B                             | Q9H4A4 | Exopeptidase activity                             | [12]    |
| Aminopeptidase N                             | P15144 | Exopeptidase activity                             | [13]    |
| Amyloid-beta precursor protein               | P05067 | Antimicrobial activity                            | [15]    |
| Angiogenin                                   | P03950 | Antimicrobial activity                            | [16]    |
| Antileukoproteinase                          | P03973 | Protease inhibitor<br>Immunomodulatory effect     | [17,18] |
| Antithrombin-III                             | P01008 | Protease inhibitor                                | [19]    |
| Apolipoprotein A-I                           | P02647 | Antimicrobial activity                            | [20]    |
| Apolipoprotein A-II                          | P02652 | Immunomodulatory effect                           | [21]    |
| Apolipoprotein A-IV                          | P06727 | Immunomodulatory effect                           | [22]    |
| Apolipoprotein B-100                         | P04114 | Antimicrobial activity                            | [23]    |
| Apolipoprotein C-III                         | P02656 | Immunomodulatory effect                           | [24]    |
| Apolipoprotein D                             | P05090 | Immunomodulatory effect                           | [26]    |
| Apolipoprotein E                             | P02649 | Immunomodulatory effect                           | [27]    |
| Apolipoprotein L1                            | O14791 | Immunomodulatory effect                           | [28]    |
| Apolipoprotein M                             | O95445 | Immunomodulatory effect                           | [29]    |
| Arginase-1                                   | P05089 | Antifungal activity<br>Immunomodulatory effect    | [30,31] |
| Aspartyl aminopeptidase                      | Q9ULA0 | Exopeptidase activity                             | [32]    |
| Azurocidin                                   | P20160 | Antimicrobial activity                            | [33]    |
| Bactericidal permeability-increasing protein | P17213 | Antimicrobial activity                            | [33,34] |
| Beta-2-glycoprotein 1                        | P02749 | Immunomodulatory effect                           | [35]    |
| Beta-2-microglobulin                         | P61769 | Antimicrobial activity<br>Immunomodulatory effect | [36,37] |
| Beta-Ala-His dipeptidase                     | Q96KN2 | Carboxypeptidase activity                         | [38]    |
| Beta-defensin 1                              | P60022 | Antimicrobial activity                            | [33]    |
| Beta-defensin 103                            | P81534 | Antimicrobial activity                            | [33]    |
| Beta-defensin 125                            | Q8N687 | Antimicrobial activity                            | [33]    |
| Beta-defensin 4A                             | O15263 | Antimicrobial activity                            | [33]    |
| Beta-hexosaminidase subunit alpha            | P06865 | Antimicrobial activity                            | [39]    |
| Beta-hexosaminidase subunit beta             | P07686 | Antimicrobial activity                            | [39]    |
| BPI fold-containing family A member 1        | Q9NP55 | Antimicrobial activity                            | [41]    |
| BPI fold-containing family A member 2        | Q96DR5 | Antimicrobial activity                            | [42]    |
| BPI fold-containing family B member 1        | Q8TDL5 | Antimicrobial activity                            | [44]    |

---

|                                                              |        |                                                   |      |
|--------------------------------------------------------------|--------|---------------------------------------------------|------|
| BPI fold-containing family B member 2                        | Q8N4F0 | Antimicrobial activity                            | [44] |
| Brain-specific serine protease 4                             | Q9GZN4 | Serine protease activity                          | [47] |
| Calcitonin gene-related peptide 1                            | P06881 | Antimicrobial activity                            | [48] |
| Calpain-1 catalytic subunit                                  | P07384 | Endopeptidase activity<br>Immunomodulatory effect | [49] |
| Calpain-2 catalytic subunit                                  | P17655 | Endopeptidase activity<br>Immunomodulatory effect | [49] |
| Calpastatin                                                  | P20810 | Protease inhibitor                                | [50] |
| Carboxypeptidase A4                                          | Q9UI42 | Carboxypeptidase activity                         | [51] |
| Carboxypeptidase B2                                          | Q96IY4 | Carboxypeptidase activity                         | [52] |
| Carboxypeptidase D                                           | O75976 | Carboxypeptidase activity                         | [53] |
| Carboxypeptidase E                                           | P16870 | Carboxypeptidase activity                         | [53] |
| Carboxypeptidase M                                           | P14384 | Carboxypeptidase activity                         | [54] |
| Carboxypeptidase N catalytic chain                           | P15169 | Carboxypeptidase activity                         | [55] |
| Carboxypeptidase Q                                           | Q9Y646 | Carboxypeptidase activity                         | [56] |
| Carcinoembryonic antigen-related cell<br>adhesion molecule 1 | P13688 | Immunomodulatory effect                           | [57] |
| Catalase                                                     | P04040 | Antimicrobial activity                            | [59] |
| Cathelicidin antimicrobial peptide                           | P49913 | Antimicrobial activity                            | [33] |
| Cathepsin B                                                  | P07858 | Endopeptidase activity                            | [60] |
| Cathepsin D                                                  | P07339 | Endopeptidase activity                            | [60] |
| Cathepsin F                                                  | Q9UBX1 | Endopeptidase activity                            | [60] |
| Cathepsin G                                                  | P08311 | Endopeptidase activity                            | [60] |
| Cathepsin L2                                                 | O60911 | Endopeptidase activity                            | [60] |
| Cathepsin S                                                  | P25774 | Endopeptidase activity                            | [60] |
| Cathepsin Z                                                  | Q9UBR2 | Endopeptidase activity                            | [60] |
| Ceruloplasmin                                                | P00450 | Cu <sup>2+</sup> sequestering activity            | [62] |
| Chitinase-3-like protein 1                                   | P36222 | Antimicrobial activity                            | [63] |
| Chitotriosidase-1                                            | Q13231 | Antifungal activity                               | [64] |
| Chromogranin-A                                               | P10645 | Processed forms have anti-<br>microbial activity  | [65] |
| Clusterin                                                    | P10909 | Immunomodulatory effect                           | [66] |
| Core histone macro-H2A.1                                     | O75367 | Antimicrobial activity                            | [68] |
| Corticosteroid-binding globulin                              | P08185 | Protease inhibitor                                | [69] |
| Cystatin-A                                                   | P01040 | Protease inhibitor                                | [71] |
| Cystatin-B                                                   | P04080 | Protease inhibitor                                | [71] |
| Cystatin-C                                                   | P01034 | Protease inhibitor                                | [71] |
| Cystatin-D                                                   | P28325 | Protease inhibitor                                | [71] |
| Cystatin-F                                                   | O76096 | Protease inhibitor                                | [71] |
| Cystatin-M                                                   | Q15828 | Protease inhibitor                                | [71] |
| Cystatin-S                                                   | P01036 | Protease inhibitor                                | [71] |
| Cystatin-SA                                                  | P09228 | Protease inhibitor                                | [71] |
| Cystatin-SN                                                  | P01037 | Protease inhibitor                                | [71] |
| Cytosol aminopeptidase                                       | P28838 | Aminopeptidase activity                           | [72] |

---

|                                                                   |        |                                                   |           |
|-------------------------------------------------------------------|--------|---------------------------------------------------|-----------|
| Cytosolic non-specific dipeptidase                                | Q96KP4 | Carboxypeptidase activity                         | [75]      |
| Deleted in malignant brain tumors 1 protein                       | Q9UGM3 | Immunomodulatory effect<br>Antimicrobial activity | [76,77]   |
| Deoxyribonuclease-1                                               | P24855 | Endonuclease activity                             | [78]      |
| Dermcidin                                                         | P81605 | Antimicrobial activity                            | [33]      |
| Dipeptidyl peptidase 1                                            | P53634 | Carboxypeptidase activity                         | [81]      |
| Dipeptidyl peptidase 2                                            | Q9UHL4 | Carboxypeptidase activity                         | [82]      |
| Dipeptidyl peptidase 3                                            | Q9NY33 | Carboxypeptidase activity                         | [83]      |
| Dipeptidyl peptidase 4                                            | P27487 | Carboxypeptidase activity                         | [84]      |
| Disintegrin and metalloproteinase<br>domain-containing protein 10 | O14672 | Metalloendopeptidase activ-<br>ity                | [86]      |
| Disintegrin and metalloproteinase<br>domain-containing protein 15 | Q13444 | Metalloendopeptidase<br>activity                  | [86]      |
| Disintegrin and metalloproteinase<br>domain-containing protein 9  | Q13443 | Metalloendopeptidase<br>activity                  | [86]      |
| Drebrin-like protein                                              | Q9UJU6 | Immunomodulatory effect                           | [87]      |
| Elafin                                                            | P19957 | Protease inhibitor                                | [88]      |
| Endoplasmic reticulum aminopeptidase 1                            | Q9NZ08 | Aminopeptidase activity                           | [89]      |
| Endoplasmic reticulum aminopeptidase 2                            | Q6P179 | Aminopeptidase activity                           | [89]      |
| Eosinophil cationic protein                                       | P12724 | Antimicrobial activity                            | [90]      |
| Extracellular glycoprotein lacritin                               | Q9GZZ8 | Antimicrobial activity                            | [92]      |
| Fatty acid-binding protein 5                                      | Q01469 | Immunomodulatory effect                           | [94]      |
| Fibrinogen alpha chain                                            | P02671 | Immunomodulatory effect                           | [95]      |
| Fibrinogen beta chain                                             | P02675 | Immunomodulatory effect                           | [95]      |
| Fibrinogen gamma chain                                            | P02679 | Immunomodulatory effect                           | [95]      |
| Fibroleukin                                                       | Q14314 | Immunomodulatory effect                           | [97]      |
| Furin                                                             | P09958 | Serine protease activity                          | [99]      |
| Galectin-1                                                        | P09382 | Immunomodulatory effect                           | [101]     |
| Galectin-10                                                       | Q05315 | Immunomodulatory effect                           | [102]     |
| Galectin-3                                                        | P17931 | Immunomodulatory effect                           | [103]     |
| Galectin-3-binding protein                                        | Q08380 | Antimicrobial activity<br>Immunomodulatory effect | [104,105] |
| Galectin-7                                                        | P47929 | Immunomodulatory effect                           | [106]     |
| Gelsolin                                                          | P06396 | Processed from has antimi-<br>crobial activity    | [109]     |
| Glucose-6-phosphate isomerase                                     | P06744 | Induces immunoglobulin<br>secretion               | [111]     |
| Glutamate carboxypeptidase 2                                      | Q04609 | Carboxypeptidase activity                         | [112]     |
| Glutathione S-transferase omega-1                                 | P78417 | Immunomodulatory effect                           | [114]     |
| Glutathione S-transferase P                                       | P09211 | Immunomodulatory effect                           | [115]     |
| Glyceraldehyde-3-phosphate<br>dehydrogenase                       | P04406 | Immunomodulatory effect                           | [116]     |
| Growth-regulated alpha protein                                    | P09341 | Antimicrobial activity                            | [118]     |
| Guanylate-binding protein 1                                       | P32455 | Immunomodulatory effect                           | [119]     |
| Guanylate-binding protein 2                                       | P32456 | Antiviral effect                                  | [120]     |

|                                |        |                                                                  |       |
|--------------------------------|--------|------------------------------------------------------------------|-------|
| Guanylate-binding protein 4    | Q96PP9 | Immunomodulatory effect                                          | [119] |
| Haptoglobin                    | P00738 | Immunomodulatory effect<br>Iron sequestering                     | [122] |
| Haptoglobin-related protein    | P00739 | Anti-parasitic effect                                            | [123] |
| Heme-binding protein 1         | Q9NRV9 | Heme/iron sequestration                                          | [124] |
| Heme-binding protein 2         | Q9Y5Z4 | Heme/iron sequestration                                          | [124] |
| Hemoglobin subunit alpha       | P69905 | Processed forms (hemo-<br>cidins) have antimicrobial<br>activity | [125] |
| Hemoglobin subunit beta        | P68871 | Processed forms (hemo-<br>cidins) have antimicrobial<br>activity | [125] |
| Hemopexin                      | P02790 | Antibacterail effect<br>Anti-inflammatory effect                 | [126] |
| Heparin cofactor 2             | P05546 | Protease inhibitor                                               | [127] |
| High mobility group protein B1 | P09429 | Immunomodulatory effect                                          | [130] |
| High mobility group protein B2 | P26583 | Antimicrobial activity                                           | [131] |
| Histatin-1                     | P15515 | Antimicrobial activity                                           | [246] |
| Histatin-3                     | P15516 | Antimicrobial activity                                           | [246] |
| Histidine-rich glycoprotein    | P04196 | Antimicrobial activity                                           | [133] |
| Histone H1.0                   | P07305 | Antimicrobial activity                                           | [134] |
| Histone H1.1                   | Q02539 | Antimicrobial activity                                           | [134] |
| Histone H1.10                  | Q92522 | Antimicrobial activity                                           | [134] |
| Histone H1.2                   | P16403 | Antimicrobial activity                                           | [134] |
| Histone H1.3                   | P16402 | Antimicrobial activity                                           | [134] |
| Histone H1.4                   | P10412 | Antimicrobial activity                                           | [134] |
| Histone H1.5                   | P16401 | Antimicrobial activity                                           | [134] |
| Histone H2A type 1             | P0C0S8 | Antimicrobial activity                                           | [134] |
| Histone H2A type 1-B/E         | P04908 | Antimicrobial activity                                           | [134] |
| Histone H2A type 1-D           | P20671 | Antimicrobial activity                                           | [134] |
| Histone H2A type 1-H           | Q96KK5 | Antimicrobial activity                                           | [134] |
| Histone H2A type 1-J           | Q99878 | Antimicrobial activity                                           | [134] |
| Histone H2A type 2-A           | Q6FI13 | Antimicrobial activity                                           | [134] |
| Histone H2A type 2-C           | Q6FI13 | Antimicrobial activity                                           | [134] |
| Histone H2A type 3             | Q7L7L0 | Antimicrobial activity                                           | [134] |
| Histone H2A.J                  | Q9BTM1 | Antimicrobial activity                                           | [134] |
| Histone H2A.Z                  | P0C0S5 | Antimicrobial activity                                           | [134] |
| Histone H2AX                   | P16104 | Antimicrobial activity                                           | [134] |
| Histone H2B type 1-A           | Q96A08 | Antimicrobial activity                                           | [134] |
| Histone H2B type 1-B           | P33778 | Antimicrobial activity                                           | [134] |
| Histone H2B type 1-C/E/F/G/I   | P62807 | Antimicrobial activity                                           | [134] |
| Histone H2B type 1-D           | P58876 | Antimicrobial activity                                           | [134] |
| Histone H2B type 1-H           | Q93079 | Antimicrobial activity                                           | [134] |
| Histone H2B type 1-J           | P06899 | Antimicrobial activity                                           | [134] |
| Histone H2B type 1-K           | O60814 | Antimicrobial activity                                           | [134] |

|                                              |        |                                                                                |           |
|----------------------------------------------|--------|--------------------------------------------------------------------------------|-----------|
| Histone H2B type 1-L                         | Q99880 | Antimicrobial activity                                                         | [134]     |
| Histone H2B type 1-M                         | Q99879 | Antimicrobial activity                                                         | [134]     |
| Histone H2B type 1-N                         | Q99877 | Antimicrobial activity                                                         | [134]     |
| Histone H2B type 1-O                         | P23527 | Antimicrobial activity                                                         | [134]     |
| Histone H2B type 2-E                         | Q16778 | Antimicrobial activity                                                         | [134]     |
| Histone H2B type 2-F                         | Q5QNW6 | Antimicrobial activity                                                         | [134]     |
| Histone H2B type 3-B                         | Q8N257 | Antimicrobial activity                                                         | [134]     |
| Histone H2B type F-S                         | P57053 | Antimicrobial activity                                                         | [134]     |
| Histone H3.1                                 | P68431 | Antimicrobial activity                                                         | [134]     |
| Histone H3.1t                                | Q16695 | Antimicrobial activity                                                         | [134]     |
| Histone H3.2                                 | Q71DI3 | Antimicrobial activity                                                         | [134]     |
| Histone H3.3                                 | P84243 | Antimicrobial activity                                                         | [134]     |
| Histone H3.3C                                | Q6NXT2 | Antimicrobial activity                                                         | [134]     |
| Histone H4                                   | P62805 | Antimicrobial activity                                                         | [134]     |
| Inter-alpha-trypsin inhibitor heavy chain H1 | P19827 | Protease inhibitor                                                             | [135]     |
| Inter-alpha-trypsin inhibitor heavy chain H2 | P19823 | Protease inhibitor                                                             | [135]     |
| Inter-alpha-trypsin inhibitor heavy chain H3 | Q06033 | Protease inhibitor                                                             | [135]     |
| Inter-alpha-trypsin inhibitor heavy chain H4 | Q14624 | Protease inhibitor                                                             | [135]     |
| Kallikrein-10                                | O43240 | Serine protease activity                                                       | [138]     |
| Kallikrein-11                                | Q9UBX7 | Serine protease activity                                                       | [138]     |
| Kallikrein-12                                | Q9UKR0 | Serine protease activity                                                       | [138]     |
| Kallikrein-13                                | Q9UKR3 | Serine protease activity                                                       | [138]     |
| Kallikrein-14                                | Q9P0G3 | Serine protease activity                                                       | [138]     |
| Kallikrein-6                                 | Q92876 | Serine protease activity                                                       | [138]     |
| Kallikrein-7                                 | P49862 | Serine protease activity<br>Processing the maturation of<br>LL-37 cathelicidin | [138,139] |
| Kallikrein-8                                 | O60259 | Serine protease activity                                                       | [138]     |
| Kininogen-1                                  | P01042 | Antimicrobial activity                                                         | [140,141] |
| Kunitz-type protease inhibitor 1             | O43278 | Protease inhibitor                                                             | [142]     |
| Kunitz-type protease inhibitor 2             | O43291 | Protease inhibitor                                                             | [142]     |
| Lactoperoxidase                              | P22079 | Antimicrobial activity                                                         | [143]     |
| Lactotransferrin                             | P02788 | Antimicrobial activity<br>Iron sequestration                                   | [33]      |
| Legumain                                     | Q99538 | Endopeptidase activity                                                         | [144]     |
| Leukocyte elastase inhibitor                 | P30740 | Protease inhibitor                                                             | [145]     |
| Lipocalin-1                                  | P31025 | Immunomodulatory effect<br>Iron sequestration                                  | [146,147] |
| Lipocalin-2                                  | P80188 | Immunomodulatory effect<br>Iron sequestration                                  | [146,147] |
| Lipopolysaccharide-binding protein           | P18428 | Immunomodulatory effect                                                        | [148]     |
| Lymphotactin                                 | P47992 | Antimicrobial activity                                                         | [150]     |
| Lysozyme C                                   | P61626 | Antimicrobial activity                                                         | [33]      |
| Macrophage migration inhibitory factor       | P14174 | Antimicrobial activity                                                         | [151]     |

---

|                                        |        |                                                   |       |
|----------------------------------------|--------|---------------------------------------------------|-------|
| Major vault protein                    | Q14764 | Immunomodulatory effect                           | [152] |
| Mammaglobin-B                          | O75556 | Immunomodulatory effect                           | [153] |
| Matrix metalloproteinase-9             | P14780 | Metalloprotease activity                          | [155] |
| Melanotransferrin                      | P08582 | Iron sequestration                                | [156] |
| Metalloproteinase inhibitor 1          | P01033 | Protease Inhibitor                                | [157] |
| Metalloproteinase inhibitor 2          | P16035 | Protease Inhibitor                                | [157] |
| Midkine                                | P21741 | Immunomodulatory effect                           | [158] |
| Moesin                                 | P26038 | Immunomodulatory effect                           | [159] |
| Mucin-1                                | P15941 | Antimicrobial activity                            | [160] |
| Mucin-13                               | Q9H3R2 | Antimicrobial activity                            | [160] |
| Mucin-15                               | Q8N387 | Antimicrobial activity                            | [160] |
| Mucin-16                               | Q8WXI7 | Antimicrobial activity                            | [160] |
| Mucin-4                                | Q99102 | Antimicrobial activity                            | [160] |
| Mucin-5AC                              | P98088 | Antimicrobial activity                            | [160] |
| Mucin-5B                               | Q9HC84 | Antimicrobial activity                            | [160] |
| Mucin-6                                | Q6W4X9 | Antimicrobial activity                            | [160] |
| Mucin-7                                | Q8TAX7 | Antimicrobial activity                            | [160] |
| Myeloblastin                           | P24158 | Serine protease activity                          | [161] |
| Myeloperoxidase                        | P05164 | Antimicrobial activity                            | [162] |
| N-acetylmuramoyl-L-alanine amidase     | Q96PD5 | Antimicrobial activity                            | [164] |
| Neutrophil collagenase                 | P22894 | Endopeptidase activity<br>Immunomodulatory effect | [166] |
| Neutrophil defensin 1                  | P59665 | Antimicrobial activity                            | [33]  |
| Neutrophil defensin 3                  | P59666 | Antimicrobial activity                            | [33]  |
| Neutrophil defensin 4                  | P12838 | Antimicrobial activity                            | [33]  |
| Neutrophil elastase                    | P08246 | Serine protease activity                          | [167] |
| Nicotinamide phosphoribosyltransferase | P43490 | Immunomodulatory effect                           | [168] |
| Non-histone chromosomal protein HMG-17 | P05204 | Antimicrobial activity                            | [169] |
| Non-secretory ribonuclease             | P10153 | Ribonuclease activity                             | [170] |
| Opiorphin prepropeptide                | Q99935 | Protease inhibitor                                | [171] |
| Peptidase inhibitor 16                 | Q6UXB8 | Protease inhibitor                                | [172] |
| Peptidoglycan recognition protein 1    | O75594 | Antimicrobial activity                            | [173] |
| Peptidoglycan recognition protein 3    | Q96LB9 | Antimicrobial activity                            | [173] |
| Phospholipase B-like 1                 | Q6P4A8 | Suggested antimicrobial<br>activity               | [175] |
| Pigment epithelium-derived factor      | P36955 | Protease inhibitor                                | [176] |
| Plasma kallikrein                      | P03952 | Serine protease activity                          | [138] |
| Plasma serine protease inhibitor       | P05154 | Protease inhibitor                                | [177] |
| Plastin-2                              | P13796 | Immunomodulatory effect                           | [178] |
| Poly(rC)-binding protein 1             | Q15365 | Antiviral effect                                  | [179] |
| Poly(rC)-binding protein 2             | Q15366 | Antiviral effect                                  | [180] |
| Pregnancy zone protein                 | P20742 | Protease inhibitor                                | [181] |
| Pro-cathepsin H                        | P09668 | Endopeptidase activity                            | [60]  |
| Procathepsin L                         | P07711 | Endopeptidase activity                            | [60]  |

---



|                                                |        |                                                       |           |
|------------------------------------------------|--------|-------------------------------------------------------|-----------|
| Progranulin                                    | P28799 | Immunomodulatory effect                               | [184]     |
|                                                |        | Aspartic-type endopeptidase activity                  |           |
| Prolactin-inducible protein                    | P12273 | Modulates the activity of Zn- $\alpha$ 2 glycoprotein | [185,186] |
| Proline-rich protein 27                        | Q16378 | Antimicrobial activity                                | [187]     |
| Proline-rich protein 4                         | Q16378 | Antimicrobial activity                                | [187]     |
| Prolyl endopeptidase                           | P48147 | Endopeptidase activity                                | [188]     |
| Prosaposin                                     | P07602 | Processed forms has antimicrobial effect              | [191]     |
| Prostasin                                      | Q16651 | Serine protease activity                              | [192]     |
| Protein AMBP                                   | P02760 | Protease inhibitor                                    | [193]     |
| Protein S100-A10                               | P60903 | Immunomodulatory effect                               | [196]     |
| Protein S100-A11                               | P31949 | Immunomodulatory effect                               | [197]     |
| Protein S100-A12                               | P80511 | Immunomodulatory effect                               | [196]     |
| Protein S100-A13                               | Q99584 | Immunomodulatory effect                               | [198]     |
| Protein S100-A14                               | Q9HCY8 | Immunomodulatory effect                               | [199]     |
| Protein S100-A2                                | P29034 | Immunomodulatory effect                               | [200]     |
| Protein S100-A4                                | P26447 | Immunomodulatory effect                               | [196]     |
| Protein S100-A6                                | P06703 | Immunomodulatory effect                               | [201]     |
| Protein S100-A7                                | P31151 | Immunomodulatory effect                               | [196]     |
| Protein S100-A8                                | P05109 | Immunomodulatory effect                               | [196]     |
| Protein S100-A9                                | P06702 | Immunomodulatory effect                               | [196]     |
| Protein S100-P                                 | P25815 | Immunomodulatory effect                               | [196]     |
| Puromycin-sensitive aminopeptidase             | P55786 | Aminopeptidase activity                               | [203]     |
| Ribonuclease 4                                 | P34096 | Ribonuclease activity                                 | [170]     |
| Ribonuclease 7                                 | Q9H1E1 | Ribonuclease activity                                 | [170]     |
| Ribonuclease pancreatic                        | P07998 | Ribonuclease activity                                 | [170]     |
| Ribonuclease T2                                | O00584 | Ribonuclease activity                                 | [170]     |
| Secreted Ly-6/uPAR domain-containing protein 2 | P0DP57 | Immunomodulatory effect                               | [247]     |
| Secreted Ly-6/uPAR-related protein 1           | P55000 | Immunomodulatory effect                               | [206]     |
| Secretoglobin family 1D member 1               | O95968 | Immunomodulatory effect                               | [207]     |
| Secretoglobin family 1D member 2               | O95969 | Immunomodulatory effect                               | [207]     |
| Secretoglobin family 3A member 1               | Q96QR1 | Immunomodulatory effect                               | [208]     |
| Semenogelin-1                                  | P04279 | Processed forms has antimicrobial activity            | [209–211] |
| Semenogelin-2                                  | Q02383 | Processed forms has antimicrobial activity            | [209–211] |
| Serine protease 1                              | P07477 | Serine protease activity                              | [212]     |
| Serine protease 23                             | O95084 | Serine protease activity                              | [212]     |
| Serine protease 27                             | Q9BQR3 | Serine protease activity                              | [212]     |
| Serine protease HTRA1                          | Q92743 | Serine protease activity                              | [212]     |
| Serine protease inhibitor Kazal-type 5         | Q9NQ38 | Protease inhibitor                                    | [213]     |
| Serine protease inhibitor Kazal-type 7         | P58062 | Protease inhibitor                                    | [213]     |

|                                           |        |                           |           |
|-------------------------------------------|--------|---------------------------|-----------|
| Serotransferrin                           | P02787 | Iron sequestration        | [214]     |
| Serpin B10                                | P48595 | Protease inhibitor        | [215]     |
| Serpin B12                                | Q96P63 | Protease inhibitor        | [215]     |
| Serpin B13                                | Q9UIV8 | Protease inhibitor        | [215]     |
| Serpin B3                                 | P29508 | Protease inhibitor        | [215]     |
| Serpin B4                                 | P48594 | Protease inhibitor        | [215]     |
| Serpin B5                                 | P36952 | Protease inhibitor        | [215]     |
| Serpin B6                                 | P35237 | Protease inhibitor        | [215]     |
| Serpin B8                                 | P50452 | Protease inhibitor        | [215]     |
| Serpin B9                                 | P50453 | Protease inhibitor        | [215]     |
| Serum amyloid A-1 protein                 | P0DJ18 | Immunomodulatory effect   | [216]     |
| Serum amyloid A-2 protein                 | P0DJ19 | Immunomodulatory effect   | [216]     |
| Serum amyloid A-4 protein                 | P35542 | Immunomodulatory effect   | [216]     |
| Serum amyloid P-component                 | P02743 | Antiviral effect          | [217]     |
| Small proline-rich protein 3              | Q9UBC9 | Antimicrobial effect      | [187]     |
| Syntenin-1                                | O00560 | Immunomodulatory effect   | [219]     |
| T-cell immunomodulatory protein           | Q8TB96 | Immunomodulatory effect   | [220]     |
| Thioredoxin domain-containing protein 17  | Q9BRA2 | Immunomodulatory effect   | [221]     |
| Thymosin beta-10                          | P63313 | Antimicrobial activity    | [222]     |
| Thymosin beta-4                           | P62328 | Antimicrobial activity    | [222]     |
| Thyroxine-binding globulin                | P05543 | Protease inhibitor        | [223]     |
| Toll-interacting protein                  | Q9H0E2 | Immunomodulatory effect   | [224]     |
| Transgelin-2                              | P37802 | Immunomodulatory effect   | [226]     |
| Transmembrane protease serine 11A         | Q6ZMR5 | Serine protease activity  | [227]     |
| Transmembrane protease serine 11B         | Q86T26 | Serine protease activity  | [248]     |
| Transmembrane protease serine 11D         | O60235 | Serine protease activity  | [228]     |
| Transmembrane protease serine 11E         | Q9UL52 | Serine protease activity  | [229]     |
| Triokinase/FMN cyclase                    | Q3LXA3 | Immunomodulatory effect   | [230]     |
| Tripeptidyl-peptidase 1                   | O14773 | Serine protease activity  | [231]     |
| Tripeptidyl-peptidase 2                   | P29144 | Serine protease activity  | [232]     |
| Trypsin-3                                 | P35030 | Serine protease activity  | [234]     |
| Uromodulin                                | P07911 | Antimicrobial activity    | [236,237] |
| Uteroglobin                               | P11684 | Immunomodulatory effect   | [238]     |
| Vitamin D-binding protein                 | P02774 | Immunomodulatory effect   | [239]     |
| WAP four-disulfide core domain protein 12 | Q8WWY7 | Protease inhibitor        | [240]     |
| WAP four-disulfide core domain protein 2  | Q14508 | Protease inhibitor        | [240]     |
| Xaa-Pro aminopeptidase 1                  | Q9NQW7 | Aminopeptidase activity   | [241]     |
| Xaa-Pro dipeptidase                       | P12955 | Carboxypeptidase activity | [242]     |
| Zinc-alpha-2-glycoprotein                 | P25311 | Immunomodulatory effect   | [243]     |
| Zymogen granule membrane protein 16       | O60844 | Antimicrobial activity    | [244]     |
| Zymogen granule protein 16 homolog B      | Q96DA0 | Antimicrobial activity    | [245]     |

**Table S4.** Proteins involved in the first line of host defense in sweat.

| Protein name                          | UniProt entry | Function                                          | Reference |
|---------------------------------------|---------------|---------------------------------------------------|-----------|
| Alpha-1-acid glycoprotein 1           | P02763        | Immunomodulatory effect                           | [3]       |
| Alpha-1-acid glycoprotein 2           | P19652        | Immunomodulatory effect                           | [3]       |
| Alpha-2-HS-glycoprotein               | P02765        | Anti-inflammatory effect                          | [8]       |
| Alpha-2-macroglobulin                 | P01023        | Protease inhibitor                                | [9]       |
| Alpha-2-macroglobulin-like protein 1  | A8K2U0        | Protease inhibitor                                | [10]      |
| Aminopeptidase N                      | P15144        | Exopeptidase activity                             | [13]      |
| Angiogenin                            | P03950        | Antimicrobial activity                            | [16]      |
| Antileukoproteinase                   | P03973        | Protease inhibitor<br>Immunomodulatory effect     | [17,18]   |
| Antithrombin-III                      | P01008        | Protease inhibitor                                | [19]      |
| Apolipoprotein A-I                    | P02647        | Antimicrobial activity                            | [20]      |
| Apolipoprotein D                      | P05090        | Immunomodulatory effect                           | [26]      |
| Beta-2-glycoprotein 1                 | P02749        | Immunomodulatory effect                           | [35]      |
| Beta-2-microglobulin                  | P61769        | Antimicrobial activity<br>Immunomodulatory effect | [36,37]   |
| Beta-hexosaminidase subunit alpha     | P06865        | Antimicrobial activity                            | [39]      |
| Beta-hexosaminidase subunit beta      | P07686        | Antimicrobial activity                            | [39]      |
| BPI fold-containing family A member 1 | Q9NP55        | Antimicrobial activity                            | [41]      |
| BPI fold-containing family A member 2 | Q96DR5        | Antimicrobial activity                            | [42]      |
| BPI fold-containing family B member 4 | P59827        | Antimicrobial activity                            | [46]      |
| Calpain-1 catalytic subunit           | P07384        | Endopeptidase activity<br>Immunomodulatory effect | [49]      |
| Carboxypeptidase A2                   | P48052        | Carboxypeptidase activity                         | [51]      |
| Carboxypeptidase A4                   | Q9UI42        | Carboxypeptidase activity                         | [51]      |
| Carboxypeptidase M                    | P14384        | Carboxypeptidase activity                         | [54]      |
| Carboxypeptidase Q                    | Q9Y646        | Carboxypeptidase activity                         | [56]      |
| Catalase                              | P04040        | Antimicrobial activity                            | [59]      |
| Cathelicidin antimicrobial peptide    | P49913        | Antimicrobial activity                            | [33]      |
| Cathepsin B                           | P07858        | Endopeptidase activity                            | [60]      |
| Cathepsin D                           | P07339        | Endopeptidase activity                            | [60]      |
| Cathepsin F                           | Q9UBX1        | Endopeptidase activity                            | [60]      |
| Cathepsin L2                          | O60911        | Endopeptidase activity                            | [60]      |
| Cathepsin Z                           | Q9UBR2        | Endopeptidase activity                            | [60]      |
| Chitinase-3-like protein 1            | P36222        | Antimicrobial activity                            | [63]      |
| Clusterin                             | P10909        | Immunomodulatory effect                           | [66]      |
| Cystatin-A                            | P01040        | Protease inhibitor                                | [71]      |
| Cystatin-B                            | P04080        | Protease inhibitor                                | [71]      |
| Cystatin-C                            | P01034        | Protease inhibitor                                | [71]      |
| Cystatin-D                            | P28325        | Protease inhibitor                                | [71]      |
| Cystatin-M                            | Q15828        | Protease inhibitor                                | [71]      |
| Cystatin-S                            | P01036        | Protease inhibitor                                | [71]      |
| Cystatin-SA                           | P09228        | Protease inhibitor                                | [71]      |
| Cystatin-SN                           | P01037        | Protease inhibitor                                | [71]      |
| Deoxyribonuclease-1                   | P24855        | Endonuclease activity                             | [78]      |

|                                                                |        |                                                                             |           |
|----------------------------------------------------------------|--------|-----------------------------------------------------------------------------|-----------|
| Dermcidin                                                      | P81605 | Antimicrobial activity                                                      | [33]      |
| Dipeptidyl peptidase 1                                         | P53634 | Carboxypeptidase activity                                                   | [81]      |
| Dipeptidyl peptidase 2                                         | Q9UHL4 | Carboxypeptidase activity                                                   | [82]      |
| Dipeptidyl peptidase 3                                         | Q9NY33 | Carboxypeptidase activity                                                   | [83]      |
| Dipeptidyl peptidase 4                                         | P27487 | Carboxypeptidase activity                                                   | [84]      |
| Disintegrin and metalloproteinase domain-containing protein 10 | O14672 | Metalloendopeptidase activity                                               | [86]      |
| Elafin                                                         | P19957 | Protease inhibitor                                                          | [88]      |
| Extracellular glycoprotein lacritin                            | Q9GZZ8 | Antimicrobial activity                                                      | [92]      |
| Fatty acid-binding protein 5                                   | Q01469 | Immunomodulatory effect                                                     | [94]      |
| Fibrinogen alpha chain                                         | P02671 | Immunomodulatory effect                                                     | [95]      |
| Fibrinogen beta chain                                          | P02675 | Immunomodulatory effect                                                     | [95]      |
| Fibrinogen gamma chain                                         | P02679 | Immunomodulatory effect                                                     | [95]      |
| Furin                                                          | P09958 | Serine protease activity                                                    | [99]      |
| Galectin-3                                                     | P17931 | Immunomodulatory effect                                                     | [103]     |
| Galectin-3-binding protein                                     | Q08380 | Antimicrobial activity<br>Immunomodulatory effect                           | [104,105] |
| Galectin-7                                                     | P47929 | Immunomodulatory effect                                                     | [106]     |
| Gelsolin                                                       | P06396 | Processed from has antimicrobial activity                                   | [109]     |
| Glutathione S-transferase P                                    | P09211 | Immunomodulatory effect                                                     | [115]     |
| Glyceraldehyde-3-phosphate dehydrogenase                       | P04406 | Immunomodulatory effect                                                     | [116]     |
| Guanylate-binding protein 1                                    | P32455 | Immunomodulatory effect                                                     | [119]     |
| Hemoglobin subunit alpha                                       | P69905 | Processed forms (hemocidins) have antimicrobial activity                    | [125]     |
| Hemoglobin subunit beta                                        | P68871 | Processed forms (hemocidins) have antimicrobial activity                    | [125]     |
| Hemopexin                                                      | P02790 | Antibacterial effect<br>Anti-inflammatory effect                            | [126]     |
| Histatin-1                                                     | P15515 | Antimicrobial activity                                                      | [246]     |
| Histidine-rich glycoprotein                                    | P04196 | Antimicrobial activity                                                      | [133]     |
| Histone H2A.J                                                  | Q9BTM1 | Antimicrobial activity                                                      | [134]     |
| Histone H2B type 3-B                                           | Q8N257 | Antimicrobial activity                                                      | [134]     |
| Histone H4                                                     | P62805 | Antimicrobial activity                                                      | [134]     |
| Kallikrein-10                                                  | O43240 | Serine protease activity                                                    | [138]     |
| Kallikrein-13                                                  | Q9UKR3 | Serine protease activity                                                    | [138]     |
| Kallikrein-5                                                   | Q9Y337 | Serine protease activity<br>Processing the maturation of LL-37 cathelicidin | [138,139] |
| Kallikrein-9                                                   | Q9UKQ9 | Serine protease activity                                                    | [138]     |
| Lactotransferrin                                               | P02788 | Antimicrobial activity<br>Iron sequestration                                | [33]      |
| Legumain                                                       | Q99538 | Endopeptidase activity                                                      | [144]     |

|                                     |        |                                                                                                       |           |
|-------------------------------------|--------|-------------------------------------------------------------------------------------------------------|-----------|
| Lipocalin-1                         | P31025 | Immunomodulatory effect<br>Iron sequestration                                                         | [146,147] |
| Lipocalin-2                         | P80188 | Immunomodulatory effect<br>Iron sequestration                                                         | [146,147] |
| Lysozyme C                          | P61626 | Antimicrobial activity                                                                                | [33]      |
| Major vault protein                 | Q14764 | Immunomodulatory effect                                                                               | [152]     |
| Mammaglobin-B                       | O75556 | Immunomodulatory effect                                                                               | [153]     |
| Matrix metalloproteinase-9          | P14780 | Metalloprotease activity                                                                              | [155]     |
| Metalloproteinase inhibitor 2       | P16035 | Protease Inhibitor                                                                                    | [157]     |
| Moesin                              | P26038 | Immunomodulatory effect                                                                               | [159]     |
| Mucin-5AC                           | P98088 | Antimicrobial activity                                                                                | [160]     |
| Mucin-5B                            | Q9HC84 | Antimicrobial activity                                                                                | [160]     |
| Mucin-7                             | Q8TAX7 | Antimicrobial activity                                                                                | [160]     |
| Myeloblastin                        | P24158 | Serine protease activity                                                                              | [161]     |
| Neutrophil collagenase              | P22894 | Endopeptidase activity<br>Immunomodulatory effect                                                     | [166]     |
| Neutrophil defensin 1               | P59665 | Antimicrobial activity                                                                                | [33]      |
| Non-secretory ribonuclease          | P10153 | Ribonuclease activity                                                                                 | [170]     |
| Opiorphin prepropeptide             | Q99935 | Protease inhibitor                                                                                    | [171]     |
| Peptidoglycan recognition protein 3 | Q96LB9 | Antimicrobial activity                                                                                | [173]     |
| Phospholipase B-like 1              | Q6P4A8 | Suggested antimicrobial<br>activity                                                                   | [175]     |
| Pigment epithelium-derived factor   | P36955 | Protease inhibitor                                                                                    | [176]     |
| Plastin-2                           | P13796 | Immunomodulatory effect                                                                               | [178]     |
| Pro-cathepsin H                     | P09668 | Endopeptidase activity                                                                                | [60]      |
| Procathepsin L                      | P07711 | Endopeptidase activity                                                                                | [60]      |
| Prolactin-inducible protein         | P12273 | Aspartic-type endopepti-<br>dase activity<br>Modulates the activity of<br>Zn- $\alpha$ 2 glycoprotein | [185,186] |
| Proline-rich protein 27             | Q16378 | Antimicrobial activity                                                                                | [187]     |
| Proline-rich protein 4              | Q16378 | Antimicrobial activity                                                                                | [187]     |
| Prolyl endopeptidase                | P48147 | Endopeptidase activity                                                                                | [188]     |
| Protein AMBP                        | P02760 | Protease inhibitor                                                                                    | [193]     |
| Protein S100-A10                    | P60903 | Immunomodulatory effect                                                                               | [196]     |
| Protein S100-A11                    | P31949 | Immunomodulatory effect                                                                               | [197]     |
| Protein S100-A12                    | P80511 | Immunomodulatory effect                                                                               | [196]     |
| Protein S100-A2                     | P29034 | Immunomodulatory effect                                                                               | [200]     |
| Protein S100-A7                     | P31151 | Immunomodulatory effect                                                                               | [196]     |
| Protein S100-A8                     | P05109 | Immunomodulatory effect                                                                               | [196]     |
| Protein S100-A9                     | P06702 | Immunomodulatory effect                                                                               | [196]     |
| Protein S100-P                      | P25815 | Immunomodulatory effect                                                                               | [196]     |
| Puromycin-sensitive aminopeptidase  | P55786 | Aminopeptidase activity                                                                               | [203]     |
| Ribonuclease 4                      | P34096 | Ribonuclease activity                                                                                 | [170]     |
| Ribonuclease 7                      | Q9H1E1 | Ribonuclease activity                                                                                 | [170]     |

|                                           |        |                         |       |
|-------------------------------------------|--------|-------------------------|-------|
| Secretoglobulin family 1D member 1        | O95968 | Immunomodulatory effect | [207] |
| Secretoglobulin family 1D member 2        | O95969 | Immunomodulatory effect | [207] |
| Serine protease inhibitor Kazal-type 7    | P58062 | Protease inhibitor      | [213] |
| Serine protease inhibitor Kazal-type 9    | Q5DT21 | Protease inhibitor      | [213] |
| Serotransferrin                           | P02787 | Iron sequestration      | [214] |
| Serpin B12                                | Q96P63 | Protease inhibitor      | [215] |
| Serpin B5                                 | P36952 | Protease inhibitor      | [215] |
| Small proline-rich protein 4              | Q96PI1 | Antimicrobial effect    | [187] |
| Thioredoxin domain-containing protein 17  | Q9BRA2 | Immunomodulatory effect | [221] |
| Thymosin beta-4                           | P62328 | Antimicrobial activity  | [222] |
| Toll-interacting protein                  | Q9H0E2 | Immunomodulatory effect | [224] |
| WAP four-disulfide core domain protein 12 | Q8WWY7 | Protease inhibitor      | [240] |
| WAP four-disulfide core domain protein 3  | Q8IUB2 | Protease inhibitor      | [240] |
| Zinc-alpha-2-glycoprotein                 | P25311 | Immunomodulatory effect | [243] |
| Zymogen granule protein 16 homolog B      | Q96DA0 | Antimicrobial activity  | [245] |

**Table S5.** Proteins involved in the first line of host defense in the nasal secretion.

| Protein name                   | UniProt entry | Function                                      | Reference |
|--------------------------------|---------------|-----------------------------------------------|-----------|
| Alpha-1-acid glycoprotein 1    | P02763        | Immunomodulatory effect                       | [3]       |
| Alpha-1-acid glycoprotein 2    | P19652        | Immunomodulatory effect                       | [3]       |
| Alpha-1-antichymotrypsin       | P01011        | Protease inhibitor                            | [4]       |
| Alpha-1-antitrypsin            | P01009        | Protease inhibitor                            | [5]       |
| Alpha-1B-glycoprotein          | P04217        | Immunomodulatory effect                       | [6]       |
| Alpha-2-HS-glycoprotein        | P02765        | Anti-inflammatory effect                      | [8]       |
| Alpha-2-macroglobulin          | P01023        | Protease inhibitor                            | [9]       |
| Alpha-amylase 1A               | P0DUB6        | Regulation of biofilm formation               | [11]      |
| Alpha-amylase 1B               | P0DTE7        | Regulation of biofilm formation               | [11]      |
| Alpha-amylase 1C               | P0DTE8        | Regulation of biofilm formation               | [11]      |
| Amyloid-beta precursor protein | P05067        | Antimicrobial activity                        | [15]      |
| Angiogenin                     | P03950        | Antimicrobial activity                        | [16]      |
| Antileukoproteinase            | P03973        | Protease inhibitor<br>Immunomodulatory effect | [17,18]   |
| Antithrombin-III               | P01008        | Protease inhibitor                            | [19]      |
| Apolipoprotein A-I             | P02647        | Antimicrobial activity                        | [20]      |
| Apolipoprotein A-II            | P02652        | Immunomodulatory effect                       | [21]      |
| Apolipoprotein A-IV            | P06727        | Immunomodulatory effect                       | [22]      |
| Apolipoprotein B-100           | P04114        | Antimicrobial activity                        | [23]      |
| Apolipoprotein C-III           | P02656        | Immunomodulatory effect                       | [24]      |
| Apolipoprotein D               | P05090        | Immunomodulatory effect                       | [26]      |
| Apolipoprotein E               | P02649        | Immunomodulatory effect                       | [27]      |
| Azurocidin                     | P20160        | Antimicrobial activity                        | [33]      |

|                                              |        |                                                   |           |
|----------------------------------------------|--------|---------------------------------------------------|-----------|
| Bactericidal permeability-increasing protein | P17213 | Antimicrobial activity                            | [33,34]   |
| Beta-2-glycoprotein 1                        | P02749 | Immunomodulatory effect                           | [35]      |
| Beta-2-microglobulin                         | P61769 | Antimicrobial activity<br>Immunomodulatory effect | [36,37]   |
| Beta-hexosaminidase subunit beta             | P07686 | Antimicrobial activity                            | [39]      |
| BPI fold-containing family A member 1        | Q9NP55 | Antimicrobial activity                            | [41]      |
| BPI fold-containing family B member 1        | Q8TDL5 | Antimicrobial activity                            | [44]      |
| BPI fold-containing family B member 2        | Q8N4F0 | Antimicrobial activity                            | [44]      |
| BPI fold-containing family B member 3        | P59826 | Antimicrobial activity                            | [45]      |
| BPI fold-containing family B member 4        | P59827 | Antimicrobial activity                            | [46]      |
| Calcitonin gene-related peptide 1            | P06881 | Antimicrobial activity                            | [48]      |
| Calpain-1 catalytic subunit                  | P07384 | Endopeptidase activity<br>Immunomodulatory effect | [49]      |
| Catalase                                     | P04040 | Antimicrobial activity                            | [59]      |
| Cathelicidin antimicrobial peptide           | P49913 | Antimicrobial activity                            | [33]      |
| Cathepsin B                                  | P07858 | Endopeptidase activity                            | [60]      |
| Cathepsin D                                  | P07339 | Endopeptidase activity                            | [60]      |
| Cathepsin G                                  | P08311 | Endopeptidase activity                            | [60]      |
| Cathepsin S                                  | P25774 | Endopeptidase activity                            | [60]      |
| Ceruloplasmin                                | P00450 | Cu <sup>2+</sup> sequestration                    | [62]      |
| Clusterin                                    | P10909 | Immunomodulatory effect                           | [66]      |
| Corticosteroid-binding globulin              | P08185 | Protease inhibitor                                | [69]      |
| Cystatin-B                                   | P04080 | Protease inhibitor                                | [71]      |
| Cystatin-C                                   | P01034 | Protease inhibitor                                | [71]      |
| Cystatin-D                                   | P28325 | Protease inhibitor                                | [71]      |
| Cystatin-S                                   | P01036 | Protease inhibitor                                | [71]      |
| Cystatin-SA                                  | P09228 | Protease inhibitor                                | [71]      |
| Cystatin-SN                                  | P01037 | Protease inhibitor                                | [71]      |
| Cytosol aminopeptidase                       | P28838 | Aminopeptidase activity                           | [72]      |
| Cytosolic non-specific dipeptidase           | Q96KP4 | Carboxypeptidase activity                         | [75]      |
| Deleted in malignant brain tumors 1 protein  | Q9UGM3 | Immunomodulatory effect<br>Antimicrobial activity | [76,77]   |
| Dermcidin                                    | P81605 | Antimicrobial activity                            | [33]      |
| Elafin                                       | P19957 | Protease inhibitor                                | [88]      |
| Eosinophil cationic protein                  | P12724 | Antimicrobial activity                            | [90]      |
| Eosinophil peroxidase                        | P11678 | Antimicrobial activity                            | [91]      |
| Extracellular glycoprotein lacritin          | Q9GZZ8 | Antimicrobial activity                            | [92]      |
| Fatty acid-binding protein 5                 | Q01469 | Immunomodulatory effect                           | [94]      |
| Fibrinogen alpha chain                       | P02671 | Immunomodulatory effect                           | [95]      |
| Fibrinogen beta chain                        | P02675 | Immunomodulatory effect                           | [95]      |
| Fibrinogen gamma chain                       | P02679 | Immunomodulatory effect                           | [95]      |
| Galectin-10                                  | Q05315 | Immunomodulatory effect                           | [102]     |
| Galectin-3                                   | P17931 | Immunomodulatory effect                           | [103]     |
| Galectin-3-binding protein                   | Q08380 | Antimicrobial activity<br>Immunomodulatory effect | [104,105] |

|                                              |        |                                                          |       |
|----------------------------------------------|--------|----------------------------------------------------------|-------|
| Gelsolin                                     | P06396 | Processed from has antimicrobial activity                | [109] |
| Glucose-6-phosphate isomerase                | P06744 | Induces immunoglobulin secretion                         | [111] |
| Glutathione S-transferase P                  | P09211 | Immunomodulatory effect                                  | [115] |
| Glyceraldehyde-3-phosphate dehydrogenase     | P04406 | Immunomodulatory effect                                  | [116] |
| Haptoglobin                                  | P00738 | Immunomodulatory effect<br>Iron sequestration            | [122] |
| Haptoglobin-related protein                  | P00739 | Antiparasitic effect                                     | [123] |
| Hemoglobin subunit alpha                     | P69905 | Processed forms (hemocidins) have antimicrobial activity | [125] |
| Hemoglobin subunit beta                      | P68871 | Processed forms (hemocidins) have antimicrobial activity | [125] |
| Hemopexin                                    | P02790 | Antibacterail effect<br>Anti-inflammatory effect         | [126] |
| Heparin cofactor 2                           | P05546 | Protease inhibitor                                       | [127] |
| High mobility group protein B1               | P09429 | Immunomodulatory effect                                  | [130] |
| High mobility group protein B2               | P26583 | Antimicrobial activity                                   | [131] |
| Histidine-rich glycoprotein                  | P04196 | Antimicrobial activity                                   | [133] |
| Histone H1.0                                 | P07305 | Antimicrobial activity                                   | [134] |
| Histone H1.3                                 | P16402 | Antimicrobial activity                                   | [134] |
| Histone H1.4                                 | P10412 | Antimicrobial activity                                   | [134] |
| Histone H2A type 1-D                         | P20671 | Antimicrobial activity                                   | [134] |
| Histone H2A type 1-H                         | Q96KK5 | Antimicrobial activity                                   | [134] |
| Histone H2A type 2-C                         | Q16777 | Antimicrobial activity                                   | [134] |
| Histone H2A.Z                                | P0C0S5 | Antimicrobial activity                                   | [134] |
| Histone H2B type 1-C/E/F/G/I                 | P62807 | Antimicrobial activity                                   | [134] |
| Histone H2B type 1-D                         | P58876 | Antimicrobial activity                                   | [134] |
| Histone H2B type 1-H                         | Q93079 | Antimicrobial activity                                   | [134] |
| Histone H2B type 1-J                         | P06899 | Antimicrobial activity                                   | [134] |
| Histone H2B type 1-K                         | O60814 | Antimicrobial activity                                   | [134] |
| Histone H2B type 1-L                         | Q99880 | Antimicrobial activity                                   | [134] |
| Histone H2B type 1-M                         | Q99879 | Antimicrobial activity                                   | [134] |
| Histone H2B type 1-N                         | Q99877 | Antimicrobial activity                                   | [134] |
| Histone H2B type 2-F                         | Q5QNW6 | Antimicrobial activity                                   | [134] |
| Histone H2B type F-S                         | P57053 | Antimicrobial activity                                   | [134] |
| Histone H3.1                                 | P68431 | Antimicrobial activity                                   | [134] |
| Histone H3.1t                                | Q16695 | Antimicrobial activity                                   | [134] |
| Histone H3.2                                 | Q71DI3 | Antimicrobial activity                                   | [134] |
| Histone H3.3                                 | P84243 | Antimicrobial activity                                   | [134] |
| Histone H4                                   | P62805 | Antimicrobial activity                                   | [134] |
| Inter-alpha-trypsin inhibitor heavy chain H1 | P19827 | Protease inhibitor                                       | [135] |
| Inter-alpha-trypsin inhibitor heavy chain H2 | P19823 | Protease inhibitor                                       | [135] |



|                                              |        |                                            |           |
|----------------------------------------------|--------|--------------------------------------------|-----------|
| Inter-alpha-trypsin inhibitor heavy chain H4 | Q14624 | Protease inhibitor                         | [135]     |
|                                              |        | Serine protease activity                   |           |
| Kallikrein-7                                 | P49862 | Processing of LL37                         | [138]     |
|                                              |        | cathelicidin                               |           |
| Kininogen-1                                  | P01042 | Antimicrobial activity                     | [140,141] |
| Lactoperoxidase                              | P22079 | Antimicrobial activity                     | [143]     |
| Lactotransferrin                             | P02788 | Antimicrobial activity                     | [33]      |
|                                              |        | Iron sequestration                         |           |
| Leukocyte elastase inhibitor                 | P30740 | Protease inhibitor                         | [145]     |
| Lipocalin-1                                  | P31025 | Immunomodulatory effect                    | [146,147] |
|                                              |        | Iron sequestration                         |           |
| Lipocalin-2                                  | P80188 | Immunomodulatory effect                    | [146,147] |
|                                              |        | Iron sequestration                         |           |
| Lysozyme C                                   | P61626 | Antimicrobial activity                     | [33]      |
| Macrophage migration inhibitory factor       | P14174 | Antimicrobial activity                     | [151]     |
| Mammaglobin-B                                | O75556 | Immunomodulatory effect                    | [153]     |
| Matrix metalloproteinase-9                   | P14780 | Metalloprotease activity                   | [155]     |
| Metalloproteinase inhibitor 1                | P01033 | Protease Inhibitor                         | [157]     |
| Moesin                                       | P26038 | Immunomodulatory effect                    | [159]     |
| Mucin-5AC                                    | P98088 | Antimicrobial activity                     | [160]     |
| Mucin-5B                                     | Q9HC84 | Antimicrobial activity                     | [160]     |
| Mucin-7                                      | Q8TAX7 | Antimicrobial activity                     | [160]     |
| Myeloblastin                                 | P24158 | Serine protease activity                   | [161]     |
| Myeloperoxidase                              | P05164 | Antimicrobial activity                     | [162]     |
| N-acetylmuramoyl-L-alanine amidase           | Q96PD5 | Antimicrobial activity                     | [164]     |
| Neutrophil collagenase                       | P22894 | Endopeptidase activity                     | [166]     |
|                                              |        | Immunomodulatory effect                    |           |
| Neutrophil defensin 1                        | P59665 | Antimicrobial activity                     | [33]      |
| Neutrophil defensin 3                        | P59666 | Antimicrobial activity                     | [33]      |
| Neutrophil elastase                          | P08246 | Serine protease activity                   | [167]     |
| Nicotinamide phosphoribosyltransferase       | P43490 | Immunomodulatory effect                    | [168]     |
| Non-secretory ribonuclease                   | P10153 | Ribonuclease activity                      | [170]     |
| Opiorphin prepropeptide                      | Q99935 | Protease inhibitor                         | [171]     |
| Peptidoglycan recognition protein 1          | O75594 | Antimicrobial activity                     | [173]     |
| Pigment epithelium-derived factor            | P36955 | Protease inhibitor                         | [176]     |
| Plasma kallikrein                            | P03952 | Serine protease activity                   | [138]     |
| Plastin-2                                    | P13796 | Immunomodulatory effect                    | [178]     |
| Progranulin                                  | P28799 | Immunomodulatory effect                    | [184]     |
|                                              |        | Aspartic-type endopeptidase activity       |           |
| Prolactin-inducible protein                  | P12273 | Modulates the activity of                  | [185,186] |
|                                              |        | Zn- $\alpha$ 2 glycoprotein                |           |
| Proline-rich protein 4                       | Q16378 | Antimicrobial activity                     | [187]     |
| Prosaposin                                   | P07602 | Processed forms have anti-microbial effect | [191]     |
| Protein AMBP                                 | P02760 | Protease inhibitor                         | [193]     |

|                                          |        |                                           |           |
|------------------------------------------|--------|-------------------------------------------|-----------|
| Protein S100-A11                         | P31949 | Immunomodulatory effect                   | [197]     |
| Protein S100-A12                         | P80511 | Immunomodulatory effect                   | [196]     |
| Protein S100-A4                          | P26447 | Immunomodulatory effect                   | [196]     |
| Protein S100-A6                          | P06703 | Immunomodulatory effect                   | [201]     |
| Protein S100-A7                          | P31151 | Immunomodulatory effect                   | [196]     |
| Protein S100-A8                          | P05109 | Immunomodulatory effect                   | [196]     |
| Protein S100-A9                          | P06702 | Immunomodulatory effect                   | [196]     |
| Protein S100-P                           | P25815 | Immunomodulatory effect                   | [196]     |
| Ribonuclease pancreatic                  | P07998 | Ribonuclease activity                     | [170]     |
| Secretoglobin family 1C member 1         | Q8TD33 | Immunomodulatory effect                   | [249]     |
| Secretoglobin family 1D member 1         | O95968 | Immunomodulatory effect                   | [207]     |
| Secretoglobin family 1D member 2         | O95969 | Immunomodulatory effect                   | [207]     |
| Semenogelin-1                            | P04279 | Processed forms have antimicrobial effect | [209–211] |
| Semenogelin-2                            | Q02383 | Processed forms have antimicrobial effect | [209–211] |
| Serotransferrin                          | P02787 | Iron sequestration                        | [214]     |
| Serpin B3                                | P29508 | Protease inhibitor                        | [215]     |
| Serpin B4                                | P48594 | Protease inhibitor                        | [215]     |
| Serum amyloid P-component                | P02743 | Antiviral effect                          | [217]     |
| Small proline-rich protein 3             | Q9UBC9 | Antimicrobial effect                      | [187]     |
| Thymosin beta-10                         | P63313 | Antimicrobial activity                    | [222]     |
| Thymosin beta-4                          | P62328 | Antimicrobial activity                    | [222]     |
| Thyroxine-binding globulin               | P05543 | Protease inhibitor                        | [223]     |
| Transgelin-2                             | P37802 | Immunomodulatory effect                   | [226]     |
| Uteroglobin                              | P11684 | Immunomodulatory effect                   | [238]     |
| Vitamin D-binding protein                | P02774 | Immunomodulatory effect                   | [239]     |
| WAP four-disulfide core domain protein 2 | Q14508 | Protease inhibitor                        | [240]     |
| Zinc-alpha-2-glycoprotein                | P25311 | Immunomodulatory effect                   | [243]     |
| Zymogen granule membrane protein 16      | O60844 | Antimicrobial activity                    | [244]     |

**Table S6.** Proteins involved in the first line of host defense in urine.

| Protein name                         | UniProt entry | Function                 | Reference |
|--------------------------------------|---------------|--------------------------|-----------|
| ADAM DEC1                            | O15204        | Immunomodulatory effect  | [2]       |
| Alpha-1-acid glycoprotein 1          | P02763        | Immunomodulatory effect  | [3]       |
| Alpha-1-acid glycoprotein 2          | P19652        | Immunomodulatory effect  | [3]       |
| Alpha-1-antichymotrypsin             | P01011        | Protease inhibitor       | [4]       |
| Alpha-1-antitrypsin                  | P01009        | Protease inhibitor       | [5]       |
| Alpha-1B-glycoprotein                | P04217        | Immunomodulatory effect  | [6]       |
| Alpha-2-antiplasmin                  | P08697        | Protease inhibitor       | [7]       |
| Alpha-2-HS-glycoprotein              | P02765        | Anti-inflammatory effect | [8]       |
| Alpha-2-macroglobulin                | P01023        | Protease inhibitor       | [9]       |
| Alpha-2-macroglobulin-like protein 1 | A8K2U0        | Protease inhibitor       | [10]      |

|                                              |        |                                                   |         |
|----------------------------------------------|--------|---------------------------------------------------|---------|
| Alpha-amylase 1A                             | P0DUB6 | Regulation of biofilm formation                   | [11]    |
| Alpha-amylase 1B                             | P0DTE7 | Regulation of biofilm formation                   | [11]    |
| Alpha-amylase 1C                             | P0DTE8 | Regulation of biofilm formation                   | [11]    |
| Alpha-amylase 2B                             | P19961 | Regulation of biofilm formation                   | [11]    |
| Aminopeptidase B                             | Q9H4A4 | Exopeptidase activity                             | [12]    |
| Aminopeptidase N                             | P15144 | Exopeptidase activity                             | [13]    |
| Amyloid-beta precursor protein               | P05067 | Antimicrobial activity                            | [15]    |
| Angiogenin                                   | P03950 | Antimicrobial activity                            | [16]    |
| Antileukoproteinase                          | P03973 | Protease inhibitor<br>Immunomodulatory effect     | [17,18] |
| Antithrombin-III                             | P01008 | Protease inhibitor                                | [19]    |
| Apolipoprotein A-I                           | P02647 | Antimicrobial activity                            | [20]    |
| Apolipoprotein A-II                          | P02652 | Immunomodulatory effect                           | [21]    |
| Apolipoprotein A-IV                          | P06727 | Immunomodulatory effect                           | [22]    |
| Apolipoprotein B-100                         | P04114 | Antimicrobial activity                            | [23]    |
| Apolipoprotein C-III                         | P02656 | Immunomodulatory effect                           | [24]    |
| Apolipoprotein D                             | P05090 | Immunomodulatory effect                           | [26]    |
| Apolipoprotein E                             | P02649 | Immunomodulatory effect                           | [27]    |
| Apolipoprotein L1                            | O14791 | Immunomodulatory effect                           | [28]    |
| Apolipoprotein M                             | O95445 | Immunomodulatory effect                           | [29]    |
| Arginase-1                                   | P05089 | Antifungal activity<br>Immunomodulatory effect    | [30,31] |
| Aspartyl aminopeptidase                      | Q9ULA0 | Exopeptidase activity                             | [32]    |
| Azurocidin                                   | P20160 | Antimicrobial activity                            | [33]    |
| Bactericidal permeability-increasing protein | P17213 | Antimicrobial activity                            | [33,34] |
| Beta-2-glycoprotein 1                        | P02749 | Immunomodulatory effect                           | [35]    |
| Beta-2-microglobulin                         | P61769 | Antimicrobial activity<br>Immunomodulatory effect | [36,37] |
| Beta-Ala-His dipeptidase                     | Q96KN2 | Carboxypeptidase activity                         | [38]    |
| Beta-defensin 1                              | P60022 | Antimicrobial activity                            | [33]    |
| Beta-defensin 4A                             | O15263 | Antimicrobial activity                            | [33]    |
| Beta-hexosaminidase subunit alpha            | P06865 | Antimicrobial activity                            | [39]    |
| Beta-hexosaminidase subunit beta             | P07686 | Antimicrobial activity                            | [39]    |
| Bone marrow stromal antigen 2                | Q10589 | Antiviral effect                                  | [40]    |
| BPI fold-containing family A member 1        | Q9NP55 | Antimicrobial activity                            | [41]    |
| BPI fold-containing family A member 2        | Q96DR5 | Antimicrobial activity                            | [42]    |
| BPI fold-containing family B member 1        | Q8TDL5 | Antimicrobial activity                            | [44]    |
| BPI fold-containing family B member 2        | Q8N4F0 | Antimicrobial activity                            | [44]    |
| Brain-specific serine protease 4             | Q9GZN4 | Serine protease activity                          | [47]    |
| Cactin                                       | Q8WUQ7 | Immunomodulatory effect                           | [250]   |
| Calcitonin gene-related peptide 1            | P06881 | Antimicrobial activity                            | [48]    |

|                                                              |        |                                                   |       |
|--------------------------------------------------------------|--------|---------------------------------------------------|-------|
| Calpain-1 catalytic subunit                                  | P07384 | Endopeptidase activity<br>Immunomodulatory effect | [49]  |
| Calpain-10                                                   | Q9HC96 | Endopeptidase activity<br>Immunomodulatory effect | [49]  |
| Calpain-12                                                   | Q6ZSI9 | Endopeptidase activity<br>Immunomodulatory effect | [49]  |
| Calpain-2 catalytic subunit                                  | P17655 | Endopeptidase activity<br>Immunomodulatory effect | [49]  |
| Calpain-5                                                    | O15484 | Endopeptidase activity<br>Immunomodulatory effect | [49]  |
| Calpain-6                                                    | Q9Y6Q1 | Endopeptidase activity<br>Immunomodulatory effect | [49]  |
| Calpain-7                                                    | Q9Y6W3 | Endopeptidase activity<br>Immunomodulatory effect | [49]  |
| Calpastatin                                                  | P20810 | Protease inhibitor                                | [50]  |
| Carboxypeptidase A1                                          | P15085 | Carboxypeptidase activity                         | [51]  |
| Carboxypeptidase A4                                          | Q9UI42 | Carboxypeptidase activity                         | [51]  |
| Carboxypeptidase A6                                          | Q8N4T0 | Carboxypeptidase activity                         | [51]  |
| Carboxypeptidase B                                           | P15086 | Carboxypeptidase activity                         | [52]  |
| Carboxypeptidase B2                                          | Q96IY4 | Carboxypeptidase activity                         | [52]  |
| Carboxypeptidase D                                           | O75976 | Carboxypeptidase activity                         | [53]  |
| Carboxypeptidase E                                           | P16870 | Carboxypeptidase activity                         | [53]  |
| Carboxypeptidase M                                           | P14384 | Carboxypeptidase activity                         | [54]  |
| Carboxypeptidase N catalytic chain                           | P15169 | Carboxypeptidase activity                         | [55]  |
| Carboxypeptidase Q                                           | Q9Y646 | Carboxypeptidase activity                         | [56]  |
| Carboxypeptidase Z                                           | Q66K79 | Carboxypeptidase activity                         | [251] |
| Carcinoembryonic antigen-related cell<br>adhesion molecule 1 | P13688 | Immunomodulatory effect                           | [57]  |
| Carcinoembryonic antigen-related cell<br>adhesion molecule 3 | P40198 | Immunomodulatory effect                           | [58]  |
| Carcinoembryonic antigen-related cell<br>adhesion molecule 4 | O75871 | Immunomodulatory effect                           | [252] |
| Catalase                                                     | P04040 | Antimicrobial activity                            | [59]  |
| Cathelicidin antimicrobial peptide                           | P49913 | Antimicrobial activity                            | [33]  |
| Cathepsin B                                                  | P07858 | Endopeptidase activity                            | [60]  |
| Cathepsin D                                                  | P07339 | Endopeptidase activity                            | [60]  |
| Cathepsin E                                                  | P14091 | Endopeptidase activity                            | [60]  |
| Cathepsin F                                                  | Q9UBX1 | Endopeptidase activity                            | [60]  |
| Cathepsin G                                                  | P08311 | Endopeptidase activity                            | [60]  |
| Cathepsin K                                                  | P43235 | Endopeptidase activity                            | [60]  |
| Cathepsin L2                                                 | O60911 | Endopeptidase activity                            | [60]  |
| Cathepsin O                                                  | P43234 | Endopeptidase activity                            | [60]  |
| Cathepsin S                                                  | P25774 | Endopeptidase activity                            | [60]  |
| Cathepsin Z                                                  | Q9UBR2 | Endopeptidase activity                            | [60]  |
| Cell surface glycoprotein MUC18                              | P43121 | Immunomodulatory effect                           | [61]  |
| Ceruloplasmin                                                | P00450 | Cu <sup>2+</sup> sequestering activity            | [62]  |

|                                                                |        |                                                   |         |
|----------------------------------------------------------------|--------|---------------------------------------------------|---------|
| Chitinase-3-like protein 1                                     | P36222 | Antimicrobial activity                            | [63]    |
| Chitotriosidase-1                                              | Q13231 | Antifungal activity                               | [64]    |
| Chromogranin-A                                                 | P10645 | Processed forms have anti-microbial activity      | [65]    |
| Clusterin                                                      | P10909 | Immunomodulatory effect                           | [66]    |
| Collagen alpha-1(XII) chain                                    | Q99715 | Immunomodulatory effect                           | [67]    |
| Core histone macro-H2A.1                                       | O75367 | Antimicrobial activity                            | [68]    |
| Core histone macro-H2A.2                                       | Q9P0M6 | Antimicrobial activity                            | [68]    |
| Corticosteroid-binding globulin                                | P08185 | Protease inhibitor                                | [69]    |
| C-reactive protein                                             | P02741 | Acute phase protein                               | [70]    |
| Cystatin-A                                                     | P01040 | Protease inhibitor                                | [71]    |
| Cystatin-B                                                     | P04080 | Protease inhibitor                                | [71]    |
| Cystatin-C                                                     | P01034 | Protease inhibitor                                | [71]    |
| Cystatin-D                                                     | P28325 | Protease inhibitor                                | [71]    |
| Cystatin-F                                                     | O76096 | Protease inhibitor                                | [71]    |
| Cystatin-M                                                     | Q15828 | Protease inhibitor                                | [71]    |
| Cystatin-S                                                     | P01036 | Protease inhibitor                                | [71]    |
| Cystatin-SA                                                    | P09228 | Protease inhibitor                                | [71]    |
| Cystatin-SN                                                    | P01037 | Protease inhibitor                                | [71]    |
| Cytosol aminopeptidase                                         | P28838 | Aminopeptidase activity                           | [72]    |
| Cytosolic non-specific dipeptidase                             | Q96KP4 | Carboxypeptidase activity                         | [75]    |
| Defensin-5                                                     | Q01523 | Antimicrobial activity                            | [33]    |
| Defensin-6                                                     | Q01524 | Antimicrobial activity                            | [33]    |
| Deleted in malignant brain tumors 1 protein                    | Q9UGM3 | Immunomodulatory effect<br>Antimicrobial activity | [76,77] |
| Deoxyribonuclease-1                                            | P24855 | Endonuclease activity                             | [78]    |
| Dermcidin                                                      | P81605 | Antimicrobial activity                            | [33]    |
| Dipeptidase 1                                                  | P16444 | Carboxypeptidase activity                         | [79]    |
| Dipeptidase 2                                                  | Q9H4A9 | Carboxypeptidase activity                         | [80]    |
| Dipeptidyl peptidase 1                                         | P53634 | Carboxypeptidase activity                         | [81]    |
| Dipeptidyl peptidase 2                                         | Q9UHL4 | Carboxypeptidase activity                         | [82]    |
| Dipeptidyl peptidase 3                                         | Q9NY33 | Carboxypeptidase activity                         | [83]    |
| Dipeptidyl peptidase 4                                         | P27487 | Carboxypeptidase activity                         | [84]    |
| Dipeptidyl peptidase 9                                         | Q86TI2 | Carboxypeptidase activity                         | [85]    |
| Disintegrin and metalloproteinase domain-containing protein 10 | O14672 | Metalloendopeptidase activity                     | [86]    |
| Disintegrin and metalloproteinase domain-containing protein 15 | Q13444 | Metalloendopeptidase activity                     | [86]    |
| Disintegrin and metalloproteinase domain-containing protein 17 | P78536 | Metalloendopeptidase activity                     | [86]    |
| Disintegrin and metalloproteinase domain-containing protein 19 | Q9H013 | Metalloendopeptidase activity                     | [86]    |
| Disintegrin and metalloproteinase domain-containing protein 22 | Q9P0K1 | Metalloendopeptidase activity                     | [86]    |

|                                                                |        |                                                   |           |
|----------------------------------------------------------------|--------|---------------------------------------------------|-----------|
| Disintegrin and metalloproteinase domain-containing protein 23 | O75077 | Metalloendopeptidase activity                     | [86]      |
| Disintegrin and metalloproteinase domain-containing protein 33 | Q9BZ11 | Metalloendopeptidase activity                     | [86]      |
| Disintegrin and metalloproteinase domain-containing protein 8  | P78325 | Metalloendopeptidase activity                     | [86]      |
| Disintegrin and metalloproteinase domain-containing protein 9  | Q13443 | Metalloendopeptidase activity                     | [86]      |
| Drebrin-like protein                                           | Q9UJU6 | Immunomodulatory effect                           | [87]      |
| Elafin                                                         | P19957 | Protease inhibitor                                | [88]      |
| Endoplasmic reticulum aminopeptidase 1                         | Q9NZ08 | Aminopeptidase activity                           | [89]      |
| Endoplasmic reticulum aminopeptidase 2                         | Q6P179 | Aminopeptidase activity                           | [89]      |
| Eosinophil cationic protein                                    | P12724 | Antimicrobial activity                            | [90]      |
| Eosinophil peroxidase                                          | P11678 | Antimicrobial activity                            | [91]      |
| Extracellular glycoprotein lacritin                            | Q9GZZ8 | Antimicrobial activity                            | [92]      |
| Fatty acid-binding protein 4                                   | P15090 | Immunomodulatory effect                           | [93]      |
| Fatty acid-binding protein 5                                   | Q01469 | Immunomodulatory effect                           | [94]      |
| Fibrinogen alpha chain                                         | P02671 | Immunomodulatory effect                           | [95]      |
| Fibrinogen beta chain                                          | P02675 | Immunomodulatory effect                           | [95]      |
| Fibrinogen gamma chain                                         | P02679 | Immunomodulatory effect                           | [95]      |
| Fibroleukin                                                    | Q14314 | Immunomodulatory effect                           | [97]      |
| Furin                                                          | P09958 | Serine protease activity                          | [99]      |
| Galectin-1                                                     | P09382 | Immunomodulatory effect                           | [101]     |
| Galectin-10                                                    | Q05315 | Immunomodulatory effect                           | [102]     |
| Galectin-2                                                     | P09958 | Immunomodulatory effect                           | [253]     |
| Galectin-3                                                     | P17931 | Immunomodulatory effect                           | [103]     |
| Galectin-3-binding protein                                     | Q08380 | Antimicrobial activity<br>Immunomodulatory effect | [104,105] |
| Galectin-7                                                     | P47929 | Immunomodulatory effect                           | [106]     |
| Galectin-9                                                     | O00182 | Immunomodulatory effect                           | [107]     |
| Gastricsin                                                     | P20142 | Aspartic-type endopeptidase activity              | [108]     |
| Gelsolin                                                       | P06396 | Processed from has antimicrobial activity         | [109]     |
| Glia-derived nexin                                             | P07093 | Protease inhibitor                                | [110]     |
| Glucose-6-phosphate isomerase                                  | P06744 | Induces immunoglobulin secretion                  | [111]     |
| Glutamate carboxypeptidase 2                                   | Q04609 | Carboxypeptidase activity                         | [112]     |
| Glutamyl aminopeptidase                                        | Q07075 | Aminopeptidase activity                           | [113]     |
| Glutathione S-transferase omega-1                              | P78417 | Immunomodulatory effect                           | [114]     |
| Glutathione S-transferase P                                    | P09211 | Immunomodulatory effect                           | [115]     |
| Glyceraldehyde-3-phosphate dehydrogenase                       | P04406 | Immunomodulatory effect                           | [116]     |
| Growth-regulated alpha protein                                 | P09341 | Antimicrobial activity                            | [118]     |
| Guanylate-binding protein 1                                    | P32455 | Immunomodulatory effect                           | [119]     |

|                                |        |                                                                  |           |
|--------------------------------|--------|------------------------------------------------------------------|-----------|
| Guanylate-binding protein 2    | P32456 | Antiviral effect                                                 | [120]     |
| Guanylate-binding protein 4    | Q96PP9 | Immunomodulatory effect                                          | [119]     |
| Haptoglobin                    | P00738 | Immunomodulatory effect<br>Iron sequestering                     | [122]     |
| Haptoglobin-related protein    | P00739 | Anti-parasitic effect                                            | [123]     |
| Heme-binding protein 1         | Q9NRV9 | Heme/iron sequestration                                          | [124]     |
| Heme-binding protein 2         | Q9Y5Z4 | Heme/iron sequestration                                          | [124]     |
| Hemoglobin subunit alpha       | P69905 | Processed forms (hemo-<br>cidins) have antimicrobial<br>activity | [125]     |
| Hemoglobin subunit beta        | P68871 | Processed forms (hemo-<br>cidins) have antimicrobial<br>activity | [125]     |
| Hemopexin                      | P02790 | Antibacterail effect<br>Anti-inflammatory effect                 | [126]     |
| Heparin cofactor 2             | P05546 | Protease inhibitor                                               | [127]     |
| Hepcidin                       | P81172 | Antimicrobial activity<br>Iron sequestration                     | [128,129] |
| High mobility group protein B1 | P09429 | Immunomodulatory effect                                          | [130]     |
| High mobility group protein B2 | P26583 | Antimicrobial activity                                           | [131]     |
| Histidine-rich glycoprotein    | P04196 | Antimicrobial activity                                           | [133]     |
| Histone H1.0                   | P07305 | Antimicrobial activity                                           | [134]     |
| Histone H1.1                   | Q02539 | Antimicrobial activity                                           | [134]     |
| Histone H1.10                  | Q92522 | Antimicrobial activity                                           | [134]     |
| Histone H1.2                   | P16403 | Antimicrobial activity                                           | [134]     |
| Histone H1.3                   | P16402 | Antimicrobial activity                                           | [134]     |
| Histone H1.4                   | P10412 | Antimicrobial activity                                           | [134]     |
| Histone H1.5                   | P16401 | Antimicrobial activity                                           | [134]     |
| Histone H1t                    | P22492 | Antimicrobial activity                                           | [134]     |
| Histone H2A type 1             | P0C0S8 | Antimicrobial activity                                           | [134]     |
| Histone H2A type 1-A           | Q96QV6 | Antimicrobial activity                                           | [134]     |
| Histone H2A type 1-B/E         | P04908 | Antimicrobial activity                                           | [134]     |
| Histone H2A type 1-C           | Q93077 | Antimicrobial activity                                           | [134]     |
| Histone H2A type 1-D           | P20671 | Antimicrobial activity                                           | [134]     |
| Histone H2A type 1-H           | Q96KK5 | Antimicrobial activity                                           | [134]     |
| Histone H2A type 1-J           | Q99878 | Antimicrobial activity                                           | [134]     |
| Histone H2A type 2-A           | Q6FI13 | Antimicrobial activity                                           | [134]     |
| Histone H2A type 2-B           | Q8IUE6 | Antimicrobial activity                                           | [134]     |
| Histone H2A type 2-C           | Q16777 | Antimicrobial activity                                           | [134]     |
| Histone H2A type 3             | Q7L7L0 | Antimicrobial activity                                           | [134]     |
| Histone H2A.J                  | Q9BTM1 | Antimicrobial activity                                           | [134]     |
| Histone H2A.V                  | Q71UI9 | Antimicrobial activity                                           | [134]     |
| Histone H2A.Z                  | P0C0S5 | Antimicrobial activity                                           | [134]     |
| Histone H2A-Bbd type 1         | P0C5Y9 | Antimicrobial activity                                           | [134]     |
| Histone H2AX                   | P16104 | Antimicrobial activity                                           | [134]     |

---

|                                              |        |                                                 |           |
|----------------------------------------------|--------|-------------------------------------------------|-----------|
| Histone H2B type 1-A                         | Q96A08 | Antimicrobial activity                          | [134]     |
| Histone H2B type 1-B                         | P33778 | Antimicrobial activity                          | [134]     |
| Histone H2B type 1-C/E/F/G/I                 | P62807 | Antimicrobial activity                          | [134]     |
| Histone H2B type 1-D                         | P58876 | Antimicrobial activity                          | [134]     |
| Histone H2B type 1-H                         | Q93079 | Antimicrobial activity                          | [134]     |
| Histone H2B type 1-J                         | P06899 | Antimicrobial activity                          | [134]     |
| Histone H2B type 1-K                         | O60814 | Antimicrobial activity                          | [134]     |
| Histone H2B type 1-L                         | Q99880 | Antimicrobial activity                          | [134]     |
| Histone H2B type 1-M                         | Q99879 | Antimicrobial activity                          | [134]     |
| Histone H2B type 1-N                         | Q99877 | Antimicrobial activity                          | [134]     |
| Histone H2B type 1-O                         | P23527 | Antimicrobial activity                          | [134]     |
| Histone H2B type 2-E                         | Q16778 | Antimicrobial activity                          | [134]     |
| Histone H2B type 2-F                         | Q5QNW6 | Antimicrobial activity                          | [134]     |
| Histone H2B type 3-B                         | Q8N257 | Antimicrobial activity                          | [134]     |
| Histone H2B type F-S                         | P57053 | Antimicrobial activity                          | [134]     |
| Histone H3.1                                 | P68431 | Antimicrobial activity                          | [134]     |
| Histone H3.1t                                | Q16695 | Antimicrobial activity                          | [134]     |
| Histone H3.2                                 | Q71DI3 | Antimicrobial activity                          | [134]     |
| Histone H3.3                                 | P84243 | Antimicrobial activity                          | [134]     |
| Histone H3.3C                                | Q6NXT2 | Antimicrobial activity                          | [134]     |
| Histone H3-7                                 | Q5TEC6 | Antimicrobial activity                          | [134]     |
| Histone H4                                   | P62805 | Antimicrobial activity                          | [134]     |
| Inter-alpha-trypsin inhibitor heavy chain H1 | P19827 | Protease inhibitor                              | [135]     |
| Inter-alpha-trypsin inhibitor heavy chain H2 | P19823 | Protease inhibitor                              | [135]     |
| Inter-alpha-trypsin inhibitor heavy chain H3 | Q06033 | Protease inhibitor                              | [135]     |
| Inter-alpha-trypsin inhibitor heavy chain H4 | Q14624 | Protease inhibitor                              | [135]     |
| Inter-alpha-trypsin inhibitor heavy chain H5 | Q86UX2 | Protease inhibitor                              | [135]     |
| Interferon-induced 35 kDa protein            | P80217 | Immunomodulatory effect                         | [136]     |
| Kallikrein-10                                | O43240 | Serine protease activity                        | [138]     |
| Kallikrein-11                                | Q9UBX7 | Serine protease activity                        | [138]     |
| Kallikrein-12                                | Q9UKR0 | Serine protease activity                        | [138]     |
| Kallikrein-13                                | Q9UKR3 | Serine protease activity                        | [138]     |
| Kallikrein-14                                | Q9P0G3 | Serine protease activity                        | [138]     |
| Kallikrein-2                                 | P20151 | Serine protease activity                        | [138]     |
| Kallikrein-3                                 | P07288 | Serine protease activity                        | [138]     |
| Kallikrein-5                                 | Q9Y337 | Processing the maturation of LL-37 cathelicidin | [138,139] |
| Kallikrein-6                                 | Q92876 | Serine protease activity                        | [138]     |
| Kallikrein-7                                 | P49862 | Processing the maturation of LL-37 cathelicidin | [138]     |
| Kallikrein-8                                 | O60259 | Serine protease activity                        | [138]     |

---



|                                         |        |                                                                  |           |
|-----------------------------------------|--------|------------------------------------------------------------------|-----------|
| Kininogen-1                             | P01042 | Antimicrobial activity                                           | [140,141] |
| Kunitz-type protease inhibitor 1        | O43278 | Protease inhibitor                                               | [142]     |
| Kunitz-type protease inhibitor 2        | O43291 | Protease inhibitor                                               | [142]     |
| Kunitz-type protease inhibitor 3        | P49223 | Protease inhibitor                                               | [142]     |
| Lactoperoxidase                         | P22079 | Antimicrobial activity                                           | [143]     |
| Lactotransferrin                        | P02788 | Antimicrobial activity<br>Iron sequestration                     | [33]      |
| Legumain                                | Q99538 | Endopeptidase activity                                           | [144]     |
| Leukocyte elastase inhibitor            | P30740 | Protease inhibitor                                               | [145]     |
| Lipocalin-1                             | P31025 | Immunomodulatory effect<br>Iron sequestration                    | [146,147] |
| Lipocalin-2                             | P80188 | Immunomodulatory effect<br>Iron sequestration                    | [146,147] |
| Lipopolysaccharide-binding protein      | P18428 | Immunomodulatory effect                                          | [148]     |
| Liver-expressed antimicrobial peptide 2 | Q969E1 | Antimicrobial activity                                           | [149]     |
| Lysozyme C                              | P61626 | Antimicrobial activity                                           | [33]      |
| Macrophage migration inhibitory factor  | P14174 | Antimicrobial activity                                           | [151]     |
| Major vault protein                     | Q14764 | Immunomodulatory effect                                          | [152]     |
| Mammaglobin-B                           | O75556 | Immunomodulatory effect                                          | [153]     |
| Matrix metalloproteinase-9              | P14780 | Metalloprotease activity                                         | [155]     |
| Melanotransferrin                       | P08582 | Iron sequestration                                               | [156]     |
| Metalloproteinase inhibitor 1           | P01033 | Protease Inhibitor                                               | [157]     |
| Metalloproteinase inhibitor 2           | P16035 | Protease Inhibitor                                               | [157]     |
| Metalloproteinase inhibitor 3           | P35625 | Protease Inhibitor                                               | [157]     |
| Metalloproteinase inhibitor 4           | Q99727 | Protease Inhibitor                                               | [157]     |
| Midkine                                 | P21741 | Immunomodulatory effect                                          | [158]     |
| Moesin                                  | P26038 | Immunomodulatory effect                                          | [159]     |
| Mucin-1                                 | P15941 | Antimicrobial activity                                           | [160]     |
| Mucin-13                                | Q9H3R2 | Antimicrobial activity                                           | [160]     |
| Mucin-16                                | Q8WXI7 | Antimicrobial activity                                           | [160]     |
| Mucin-2                                 | Q02817 | Antimicrobial activity                                           | [160]     |
| Mucin-4                                 | Q99102 | Antimicrobial activity                                           | [160]     |
| Mucin-5AC                               | P98088 | Antimicrobial activity                                           | [160]     |
| Mucin-5B                                | Q9HC84 | Antimicrobial activity                                           | [160]     |
| Mucin-6                                 | Q6W4X9 | Antimicrobial activity                                           | [160]     |
| Mucin-7                                 | Q8TAX7 | Antimicrobial activity                                           | [160]     |
| Myeloblastin                            | P24158 | Serine protease activity                                         | [161]     |
| Myeloperoxidase                         | P05164 | Antimicrobial activity                                           | [162]     |
| Myoglobin                               | P02144 | Processed forms (hemo-<br>cidins) have antimicrobial<br>activity | [163]     |
| N-acetylmuramoyl-L-alanine amidase      | Q96PD5 | Antimicrobial activity                                           | [164]     |
| Neprilysin                              | P08473 | Endopeptidase activity                                           | [165]     |
| Neutrophil collagenase                  | P22894 | Endopeptidase activity<br>Immunomodulatory effect                | [166]     |

|                                        |        |                                                                 |           |
|----------------------------------------|--------|-----------------------------------------------------------------|-----------|
| Neutrophil defensin 1                  | P59665 | Antimicrobial activity                                          | [33]      |
| Neutrophil defensin 3                  | P59666 | Antimicrobial activity                                          | [33]      |
| Neutrophil defensin 4                  | P12838 | Antimicrobial activity                                          | [33]      |
| Neutrophil elastase                    | P08246 | Serine protease activity                                        | [167]     |
| Nicotinamide phosphoribosyltransferase | P43490 | Immunomodulatory effect                                         | [168]     |
| Non-histone chromosomal protein HMG-17 | P05204 | Antimicrobial activity                                          | [169]     |
| Non-secretory ribonuclease             | P10153 | Ribonuclease activity                                           | [170]     |
| Peptidase inhibitor 16                 | Q6UXB8 | Protease inhibitor                                              | [172]     |
| Peptidoglycan recognition protein 1    | O75594 | Antimicrobial activity                                          | [173]     |
| Phospholipase B-like 1                 | Q6P4A8 | Suggested antimicrobial activity                                | [175]     |
| Pigment epithelium-derived factor      | P36955 | Protease inhibitor                                              | [176]     |
| Plasma kallikrein                      | P03952 | Serine protease activity                                        | [138]     |
| Plasma serine protease inhibitor       | P05154 | Protease inhibitor                                              | [177]     |
| Plastin-2                              | P13796 | Immunomodulatory effect                                         | [178]     |
| Poly(rC)-binding protein 1             | Q15365 | Antiviral effect                                                | [179]     |
| Poly(rC)-binding protein 2             | Q15366 | Antiviral effect                                                | [180]     |
| Pregnancy zone protein                 | P20742 | Protease inhibitor                                              | [181]     |
| Pro-adrenomedullin                     | P35318 | Antimicrobial activity<br>Immunomodulatory effect               | [182,183] |
| Pro-cathepsin H                        | P09668 | Endopeptidase activity                                          | [60]      |
| Procathepsin L                         | P07711 | Endopeptidase activity                                          | [60]      |
| Progranulin                            | P28799 | Immunomodulatory effect<br>Aspartic-type endopeptidase activity | [184]     |
| Prolactin-inducible protein            | P12273 | Modulates the activity of Zn- $\alpha$ 2 glycoprotein           | [185,186] |
| Proline-rich protein 15                | Q8IV56 | Antimicrobial activity                                          | [187]     |
| Proline-rich protein 4                 | Q16378 | Antimicrobial activity                                          | [187]     |
| Prolyl endopeptidase                   | P48147 | Endopeptidase activity                                          | [188]     |
| Prosalsin                              | Q8N2E6 | Antimicrobial activity                                          | [190]     |
| Prosaposin                             | P07602 | Processed forms has antimicrobial effect                        | [191]     |
| Prostasin                              | Q16651 | Serine protease activity                                        | [192]     |
| Protein AMBP                           | P02760 | Protease inhibitor                                              | [193]     |
| Protein FAM3A                          | P98173 | Antifungal effect                                               | [194]     |
| Protein S100-A1                        | P23297 | Immunomodulatory effect                                         | [195]     |
| Protein S100-A10                       | P60903 | Immunomodulatory effect                                         | [196]     |
| Protein S100-A11                       | P31949 | Immunomodulatory effect                                         | [197]     |
| Protein S100-A12                       | P80511 | Immunomodulatory effect                                         | [196]     |
| Protein S100-A13                       | Q99584 | Immunomodulatory effect                                         | [198]     |
| Protein S100-A14                       | Q9HCY8 | Immunomodulatory effect                                         | [199]     |
| Protein S100-A2                        | P29034 | Immunomodulatory effect                                         | [200]     |
| Protein S100-A4                        | P26447 | Immunomodulatory effect                                         | [196]     |
| Protein S100-A6                        | P06703 | Immunomodulatory effect                                         | [201]     |

|                                                |        |                                             |           |
|------------------------------------------------|--------|---------------------------------------------|-----------|
| Protein S100-A7                                | P31151 | Immunomodulatory effect                     | [196]     |
| Protein S100-A8                                | P05109 | Immunomodulatory effect                     | [196]     |
| Protein S100-A9                                | P06702 | Immunomodulatory effect                     | [196]     |
| Protein S100-P                                 | P25815 | Immunomodulatory effect                     | [196]     |
| Puromycin-sensitive aminopeptidase             | P55786 | Aminopeptidase activity                     | [203]     |
| RelA-associated inhibitor                      | Q8WUF5 | Antiviral effect<br>Immunomodulatory effect | [204]     |
| Retroviral-like aspartic protease 1            | Q53RT3 | Aspartic-type endopeptidase activity        | [205]     |
| Ribonuclease 4                                 | P34096 | Ribonuclease activity                       | [170]     |
| Ribonuclease 7                                 | Q9H1E1 | Ribonuclease activity                       | [170]     |
| Ribonuclease K6                                | Q93091 | Ribonuclease activity                       | [170]     |
| Ribonuclease pancreatic                        | P07998 | Ribonuclease activity                       | [170]     |
| Ribonuclease T2                                | O00584 | Ribonuclease activity                       | [170]     |
| Secreted Ly-6/uPAR domain-containing protein 2 | P0DP57 | Immunomodulatory effect                     | [247]     |
| Secreted Ly-6/uPAR-related protein 1           | P55000 | Immunomodulatory effect                     | [206]     |
| Secretoglobin family 1D member 2               | O95969 | Immunomodulatory effect                     | [207]     |
| Secretoglobin family 3A member 1               | Q96QR1 | Immunomodulatory effect                     | [208]     |
| Semenogelin-1                                  | P04279 | Processed forms has antimicrobial activity  | [209–211] |
| Semenogelin-2                                  | Q02383 | Processed forms has antimicrobial activity  | [209–211] |
| Serine protease 1                              | P07477 | Serine protease activity                    | [212]     |
| Serine protease 23                             | O95084 | Serine protease activity                    | [212]     |
| Serine protease 27                             | Q9BQR3 | Serine protease activity                    | [212]     |
| Serine protease 53                             | Q2L4Q9 | Serine protease activity                    | [212]     |
| Serine protease 58                             | Q8IYP2 | Serine protease activity                    | [212]     |
| Serine protease HTRA1                          | Q92743 | Serine protease activity                    | [212]     |
| Serine protease HTRA2                          | O43464 | Serine protease activity                    | [212]     |
| Serine protease HTRA3                          | P83110 | Serine protease activity                    | [212]     |
| Serine protease inhibitor Kazal-type 1         | P00995 | Protease inhibitor                          | [213]     |
| Serine protease inhibitor Kazal-type 2         | P20155 | Protease inhibitor                          | [213]     |
| Serine protease inhibitor Kazal-type 5         | Q9NQ38 | Protease inhibitor                          | [213]     |
| Serine protease inhibitor Kazal-type 7         | P58062 | Protease inhibitor                          | [213]     |
| Serotransferrin                                | P02787 | Iron sequestration                          | [214]     |
| Serpin B10                                     | P48595 | Protease inhibitor                          | [215]     |
| Serpin B12                                     | Q96P63 | Protease inhibitor                          | [215]     |
| Serpin B13                                     | Q9UIV8 | Protease inhibitor                          | [215]     |
| Serpin B3                                      | P29508 | Protease inhibitor                          | [215]     |
| Serpin B4                                      | P48594 | Protease inhibitor                          | [215]     |
| Serpin B5                                      | P36952 | Protease inhibitor                          | [215]     |
| Serpin B6                                      | P35237 | Protease inhibitor                          | [215]     |
| Serpin B7                                      | O75635 | Protease inhibitor                          | [215]     |
| Serpin B8                                      | P50452 | Protease inhibitor                          | [215]     |

|                                                                        |        |                           |           |
|------------------------------------------------------------------------|--------|---------------------------|-----------|
| Serpin B9                                                              | P50453 | Protease inhibitor        | [215]     |
| Serum amyloid A-1 protein                                              | P0DJ18 | Immunomodulatory effect   | [216]     |
| Serum amyloid A-2 protein                                              | P0DJ19 | Immunomodulatory effect   | [216]     |
| Serum amyloid A-4 protein                                              | P35542 | Immunomodulatory effect   | [216]     |
| Serum amyloid P-component                                              | P02743 | Antiviral effect          | [217]     |
| Sialomucin core protein 24                                             | Q04900 | Immunomodulatory effect   | [218]     |
| Small proline-rich protein 3                                           | Q9UBC9 | Antimicrobial effect      | [187]     |
| Syntenin-1                                                             | O00560 | Immunomodulatory effect   | [219]     |
| T-cell immunomodulatory protein                                        | Q8TB96 | Immunomodulatory effect   | [220]     |
| Thioredoxin domain-containing protein 17                               | Q9BRA2 | Immunomodulatory effect   | [221]     |
| Thymosin beta-10                                                       | P63313 | Antimicrobial activity    | [222]     |
| Thymosin beta-4                                                        | P62328 | Antimicrobial activity    | [222]     |
| Thyroxine-binding globulin                                             | P05543 | Protease inhibitor        | [223]     |
| Toll-interacting protein                                               | Q9H0E2 | Immunomodulatory effect   | [224]     |
| Transgelin                                                             | Q01995 | Immunomodulatory effect   | [225]     |
| Transgelin-2                                                           | P37802 | Immunomodulatory effect   | [226]     |
| Transmembrane protease serine 11A                                      | Q6ZMR5 | Serine protease activity  | [227]     |
| Transmembrane protease serine 11B                                      | Q86T26 | Serine protease activity  | [248]     |
| Transmembrane protease serine 11D                                      | O60235 | Serine protease activity  | [228]     |
| Transmembrane protease serine 11E                                      | Q9UL52 | Serine protease activity  | [229]     |
| Triokinase/FMN cyclase                                                 | Q3LXA3 | Immunomodulatory effect   | [230]     |
| Tripeptidyl-peptidase 1                                                | O14773 | Serine protease activity  | [231]     |
| Tripeptidyl-peptidase 2                                                | P29144 | Serine protease activity  | [232]     |
| Trypsin-2                                                              | P07478 | Serine protease activity  | [233]     |
| Trypsin-3                                                              | P35030 | Serine protease activity  | [234]     |
| Tryptase alpha/beta-1                                                  | Q15661 | Serine protease activity  | [234]     |
| Tryptase beta-2                                                        | P20231 | Serine protease activity  | [234]     |
| Tryptase delta                                                         | Q9BZJ3 | Serine protease activity  | [234]     |
| Tryptase gamma                                                         | Q9NRR2 | Serine protease activity  | [234]     |
| Uromodulin                                                             | P07911 | Antimicrobial activity    | [236,237] |
| Uteroglobin                                                            | P11684 | Immunomodulatory effect   | [238]     |
| Vitamin D-binding protein                                              | P02774 | Immunomodulatory effect   | [239]     |
| WAP four-disulfide core domain protein 1                               | Q9HC57 | Protease inhibitor        | [240]     |
| WAP four-disulfide core domain protein 12                              | Q8WWY7 | Protease inhibitor        | [240]     |
| WAP four-disulfide core domain protein 2                               | Q14508 | Protease inhibitor        | [240]     |
| WAP, Kazal, immunoglobulin, Kunitz and NTR domain-containing protein 1 | Q96NZ8 | Protease inhibitor        | [240]     |
| WAP, Kazal, immunoglobulin, Kunitz and NTR domain-containing protein 2 | Q8TEU8 | Protease inhibitor        | [240]     |
| Xaa-Pro aminopeptidase 1                                               | Q9NQW7 | Aminopeptidase activity   | [241]     |
| Xaa-Pro aminopeptidase 2                                               | O43895 | Aminopeptidase activity   | [241]     |
| Xaa-Pro aminopeptidase 3                                               | Q9NQH7 | Aminopeptidase activity   | [241]     |
| Xaa-Pro dipeptidase                                                    | P12955 | Carboxypeptidase activity | [242]     |

|                                      |        |                         |       |
|--------------------------------------|--------|-------------------------|-------|
| Zinc-alpha-2-glycoprotein            | P25311 | Immunomodulatory effect | [243] |
| Zymogen granule membrane protein 16  | O60844 | Antimicrobial activity  | [244] |
| Zymogen granule protein 16 homolog B | Q96DA0 | Antimicrobial activity  | [245] |

**Table S7.** Proteins involved in the first line of host defense in the cervicovaginal fluid.

| Protein name                                 | UniProt entry | Function                                          | Reference |
|----------------------------------------------|---------------|---------------------------------------------------|-----------|
| Alpha-1-acid glycoprotein 1                  | P02763        | Immunomodulatory effect                           | [3]       |
| Alpha-1-acid glycoprotein 2                  | P19652        | Immunomodulatory effect                           | [3]       |
| Alpha-1-antichymotrypsin                     | P01011        | Protease inhibitor                                | [4]       |
| Alpha-1-antitrypsin                          | P01009        | Protease inhibitor                                | [5]       |
| Alpha-1B-glycoprotein                        | P04217        | Immunomodulatory effect                           | [6]       |
| Alpha-2-antiplasmin                          | P08697        | Protease inhibitor                                | [7]       |
| Alpha-2-HS-glycoprotein                      | P02765        | Anti-inflammatory effect                          | [8]       |
| Alpha-2-macroglobulin                        | P01023        | Protease inhibitor                                | [9]       |
| Alpha-2-macroglobulin-like protein 1         | A8K2U0        | Protease inhibitor                                | [10]      |
| Alpha-amylase 1A                             | P0DUB6        | Regulation of biofilm formation                   | [11]      |
| Alpha-amylase 1B                             | P0DTE7        | Regulation of biofilm formation                   | [11]      |
| Alpha-amylase 1C                             | P0DTE8        | Regulation of biofilm formation                   | [11]      |
| Alpha-amylase 2B                             | P19961        | Regulation of biofilm formation                   | [11]      |
| Aminopeptidase N                             | P15144        | Exopeptidase activity                             | [13]      |
| Angiogenin                                   | P03950        | Antimicrobial activity                            | [16]      |
| Antileukoproteinase                          | P03973        | Protease inhibitor<br>Immunomodulatory effect     | [17,18]   |
| Antithrombin-III                             | P01008        | Protease inhibitor                                | [19]      |
| Apolipoprotein A-I                           | P02647        | Antimicrobial activity                            | [20]      |
| Apolipoprotein A-II                          | P02652        | Immunomodulatory effect                           | [21]      |
| Apolipoprotein A-IV                          | P06727        | Immunomodulatory effect                           | [22]      |
| Apolipoprotein B-100                         | P04114        | Antimicrobial activity                            | [23]      |
| Apolipoprotein L1                            | O14791        | Immunomodulatory effect                           | [28]      |
| Arginase-1                                   | P05089        | Antifungal activity<br>Immunomodulatory effect    | [30,31]   |
| Azurocidin                                   | P20160        | Antimicrobial activity                            | [33]      |
| Bactericidal permeability-increasing protein | P17213        | Antimicrobial activity                            | [33,34]   |
| Beta-2-glycoprotein 1                        | P02749        | Immunomodulatory effect                           | [35]      |
| Beta-2-microglobulin                         | P61769        | Antimicrobial activity<br>Immunomodulatory effect | [36,37]   |
| Beta-hexosaminidase subunit beta             | P07686        | Antimicrobial activity                            | [39]      |
| BPI fold-containing family A member 1        | Q9NP55        | Antimicrobial activity                            | [41]      |
| BPI fold-containing family B member 1        | Q8TDL5        | Antimicrobial activity                            | [44]      |
| BPI fold-containing family B member 2        | Q8N4F0        | Antimicrobial activity                            | [44]      |

|                                                              |        |                                                   |         |
|--------------------------------------------------------------|--------|---------------------------------------------------|---------|
| Calpain-1 catalytic subunit                                  | P07384 | Endopeptidase activity<br>Immunomodulatory effect | [49]    |
| Calpastatin                                                  | P20810 | Protease inhibitor                                | [50]    |
| Carboxypeptidase A4                                          | Q9UI42 | Carboxypeptidase activity                         | [51]    |
| Carboxypeptidase E                                           | P16870 | Carboxypeptidase activity                         | [53]    |
| Carboxypeptidase M                                           | P14384 | Carboxypeptidase activity                         | [54]    |
| Carcinoembryonic antigen-related cell<br>adhesion molecule 1 | P13688 | Immunomodulatory effect                           | [57]    |
| Catalase                                                     | P04040 | Antimicrobial activity                            | [59]    |
| Cathelicidin antimicrobial peptide                           | P49913 | Antimicrobial activity                            | [33]    |
| Cathepsin B                                                  | P07858 | Endopeptidase activity                            | [60]    |
| Cathepsin D                                                  | P07339 | Endopeptidase activity                            | [60]    |
| Cathepsin G                                                  | P08311 | Endopeptidase activity                            | [60]    |
| Cathepsin L2                                                 | O60911 | Endopeptidase activity                            | [60]    |
| Cathepsin S                                                  | P25774 | Endopeptidase activity                            | [60]    |
| Cathepsin Z                                                  | Q9UBR2 | Endopeptidase activity                            | [60]    |
| Ceruloplasmin                                                | P00450 | Cu <sup>2+</sup> sequestering activity            | [62]    |
| Chitinase-3-like protein 1                                   | P36222 | Antimicrobial activity                            | [63]    |
| Chitotriosidase-1                                            | Q13231 | Antifungal activity                               | [64]    |
| Chromogranin-A                                               | P10645 | Processed forms have anti-<br>microbial activity  | [65]    |
| Clusterin                                                    | P10909 | Immunomodulatory effect                           | [66]    |
| Collagen alpha-1(XII) chain                                  | Q99715 | Immunomodulatory effect                           | [67]    |
| Core histone macro-H2A.1                                     | O75367 | Antimicrobial activity                            | [68]    |
| Corticosteroid-binding globulin                              | P08185 | Protease inhibitor                                | [69]    |
| Cystatin-A                                                   | P01040 | Protease inhibitor                                | [71]    |
| Cystatin-B                                                   | P04080 | Protease inhibitor                                | [71]    |
| Cystatin-C                                                   | P01034 | Protease inhibitor                                | [71]    |
| Cystatin-M                                                   | Q15828 | Protease inhibitor                                | [71]    |
| Cystatin-S                                                   | P01036 | Protease inhibitor                                | [71]    |
| Cystatin-SN                                                  | P01037 | Protease inhibitor                                | [71]    |
| Cytosolic non-specific dipeptidase                           | Q96KP4 | Carboxypeptidase activity                         | [75]    |
| Deleted in malignant brain tumors 1 protein                  | Q9UGM3 | Immunomodulatory effect<br>Antimicrobial activity | [76,77] |
| Dermcidin                                                    | P81605 | Antimicrobial activity                            | [33]    |
| Dipeptidyl peptidase 1                                       | P53634 | Carboxypeptidase activity                         | [81]    |
| Dipeptidyl peptidase 2                                       | Q9UHL4 | Carboxypeptidase activity                         | [82]    |
| Dipeptidyl peptidase 3                                       | Q9NY33 | Carboxypeptidase activity                         | [83]    |
| Dipeptidyl peptidase 4                                       | P27487 | Carboxypeptidase activity                         | [84]    |
| Drebrin-like protein                                         | Q9UJU6 | Immunomodulatory effect                           | [87]    |
| Elafin                                                       | P19957 | Protease inhibitor                                | [88]    |
| Eosinophil cationic protein                                  | P12724 | Antimicrobial activity                            | [90]    |
| Eosinophil peroxidase                                        | P11678 | Antimicrobial activity                            | [91]    |
| Fatty acid-binding protein 4                                 | P15090 | Immunomodulatory effect                           | [93]    |

|                                             |        |                                                                  |           |
|---------------------------------------------|--------|------------------------------------------------------------------|-----------|
| Fatty acid-binding protein 5                | Q01469 | Immunomodulatory effect                                          | [94]      |
| Fibrinogen alpha chain                      | P02671 | Immunomodulatory effect                                          | [95]      |
| Fibrinogen beta chain                       | P02675 | Immunomodulatory effect                                          | [95]      |
| Fibrinogen gamma chain                      | P02679 | Immunomodulatory effect                                          | [95]      |
| Fibrocystin-L                               | Q86WI1 | Immunomodulatory effect                                          | [96]      |
| Fibroleukin                                 | Q14314 | Immunomodulatory effect                                          | [97]      |
| Galectin-1                                  | P09382 | Immunomodulatory effect                                          | [101]     |
| Galectin-10                                 | Q05315 | Immunomodulatory effect                                          | [102]     |
| Galectin-3                                  | P17931 | Immunomodulatory effect                                          | [103]     |
| Galectin-3-binding protein                  | Q08380 | Antimicrobial activity<br>Immunomodulatory effect                | [104,105] |
| Galectin-7                                  | P47929 | Immunomodulatory effect                                          | [106]     |
| Gelsolin                                    | P06396 | Processed from has anti-<br>microbial activity                   | [109]     |
| Glucose-6-phosphate isomerase               | P06744 | Induces immunoglobulin<br>secretion                              | [111]     |
| Glutathione S-transferase omega-1           | P78417 | Immunomodulatory effect                                          | [114]     |
| Glutathione S-transferase P                 | P09211 | Immunomodulatory effect                                          | [115]     |
| Glyceraldehyde-3-phosphate<br>dehydrogenase | P04406 | Immunomodulatory effect                                          | [116]     |
| Growth-regulated alpha protein              | P09341 | Antimicrobial activity                                           | [118]     |
| Guanylate-binding protein 2                 | P32456 | Immunomodulatory effect                                          | [120]     |
| Haptoglobin                                 | P00738 | Immunomodulatory effect<br>Iron sequestering                     | [122]     |
| Haptoglobin-related protein                 | P00739 | Anti-parasitic effect                                            | [123]     |
| Heme-binding protein 2                      | Q9Y5Z4 | Heme/iron sequestration                                          | [124]     |
| Hemoglobin subunit alpha                    | P69905 | Processed forms (hemo-<br>cidins) have antimicrobial<br>activity | [125]     |
| Hemoglobin subunit beta                     | P68871 | Processed forms (hemo-<br>cidins) have antimicrobial<br>activity | [125]     |
| Hemopexin                                   | P02790 | Antibacterail effect<br>Anti-inflammatory effect                 | [126]     |
| Heparin cofactor 2                          | P05546 | Protease inhibitor                                               | [127]     |
| High mobility group protein B1              | P09429 | Immunomodulatory effect                                          | [130]     |
| High mobility group protein B2              | P26583 | Antimicrobial activity                                           | [131]     |
| Histidine-rich glycoprotein                 | P04196 | Antimicrobial activity                                           | [133]     |
| Histone H1.0                                | P07305 | Antimicrobial activity                                           | [134]     |
| Histone H1.1                                | Q02539 | Antimicrobial activity                                           | [134]     |
| Histone H1.2                                | P16403 | Antimicrobial activity                                           | [134]     |
| Histone H1.3                                | P16402 | Antimicrobial activity                                           | [134]     |
| Histone H1.4                                | P10412 | Antimicrobial activity                                           | [134]     |
| Histone H1.5                                | P16401 | Antimicrobial activity                                           | [134]     |
| Histone H2A type 1-C                        | Q93077 | Antimicrobial activity                                           | [134]     |
| Histone H2A type 2-C                        | Q16777 | Antimicrobial activity                                           | [134]     |

|                                              |        |                                                 |           |
|----------------------------------------------|--------|-------------------------------------------------|-----------|
| Histone H2A.V                                | Q71UI9 | Antimicrobial activity                          | [134]     |
| Histone H4                                   | P62805 | Antimicrobial activity                          | [134]     |
| Inter-alpha-trypsin inhibitor heavy chain H1 | P19827 | Protease inhibitor                              | [135]     |
| Inter-alpha-trypsin inhibitor heavy chain H2 | P19823 | Protease inhibitor                              | [135]     |
| Inter-alpha-trypsin inhibitor heavy chain H4 | Q14624 | Protease inhibitor                              | [135]     |
| Interferon-induced 35 kDa protein            | P80217 | Immunomodulatory effect                         | [136]     |
| Kallikrein-10                                | O43240 | Serine protease activity                        | [138]     |
| Kallikrein-11                                | Q9UBX7 | Serine protease activity                        | [138]     |
| Kallikrein-12                                | Q9UKR0 | Serine protease activity                        | [138]     |
| Kallikrein-13                                | Q9UKR3 | Serine protease activity                        | [138]     |
| Kallikrein-3                                 | P07288 | Serine protease activity                        | [138]     |
| Kallikrein-6                                 | Q92876 | Serine protease activity                        | [138]     |
| Kallikrein-7                                 | P49862 | Serine protease activity                        | [138]     |
| Kallikrein-8                                 | O60259 | Processing the maturation of LL-37 cathelicidin | [138]     |
| Kininogen-1                                  | P01042 | Serine protease activity                        | [138]     |
| Kunitz-type protease inhibitor 1             | O43278 | Antimicrobial activity                          | [140,141] |
| Lactotransferrin                             | P02788 | Protease inhibitor                              | [142]     |
| Legumain                                     | Q99538 | Antimicrobial activity                          | [33]      |
| Leukocyte elastase inhibitor                 | P30740 | Iron sequestration                              | [33]      |
| Lipocalin-2                                  | P80188 | Endopeptidase activity                          | [144]     |
| Lipopolysaccharide-binding protein           | P18428 | Protease inhibitor                              | [145]     |
| Lysozyme C                                   | P61626 | Immunomodulatory effect                         | [146,147] |
| Macrophage migration inhibitory factor       | P14174 | Iron sequestration                              | [146,147] |
| Major vault protein                          | Q14764 | Immunomodulatory effect                         | [148]     |
| Mammaglobin-B                                | O75556 | Immunomodulatory effect                         | [148]     |
| Matrix metalloproteinase-9                   | P14780 | Antimicrobial activity                          | [33]      |
| Metalloproteinase inhibitor 1                | P01033 | Antimicrobial activity                          | [151]     |
| Metalloproteinase inhibitor 2                | P16035 | Antimicrobial activity                          | [151]     |
| Moesin                                       | P26038 | Immunomodulatory effect                         | [152]     |
| Mucin-1                                      | P15941 | Immunomodulatory effect                         | [153]     |
| Mucin-16                                     | Q8WXI7 | Metalloprotease activity                        | [155]     |
| Mucin-17                                     | Q685J3 | Protease Inhibitor                              | [157]     |
| Mucin-4                                      | Q99102 | Protease Inhibitor                              | [157]     |
| Mucin-5AC                                    | P98088 | Immunomodulatory effect                         | [159]     |
| Mucin-5B                                     | Q9HC84 | Antimicrobial activity                          | [160]     |
| Mucin-6                                      | Q6W4X9 | Antimicrobial activity                          | [160]     |
| Myeloblastin                                 | P24158 | Antimicrobial activity                          | [160]     |
| Myeloperoxidase                              | P05164 | Antimicrobial activity                          | [160]     |
| N-acetylmuramoyl-L-alanine amidase           | Q96PD5 | Serine protease activity                        | [161]     |
| Neprilysin                                   | P08473 | Antimicrobial activity                          | [162]     |
|                                              |        | Endopeptidase activity                          | [164]     |
|                                              |        |                                                 | [165]     |



|                                        |        |                                                                                                       |           |
|----------------------------------------|--------|-------------------------------------------------------------------------------------------------------|-----------|
| Neutrophil collagenase                 | P22894 | Endopeptidase activity<br>Immunomodulatory effect                                                     | [166]     |
| Neutrophil defensin 3                  | P59666 | Antimicrobial activity                                                                                | [33]      |
| Neutrophil defensin 4                  | P12838 | Antimicrobial activity                                                                                | [33]      |
| Neutrophil elastase                    | P08246 | Serine protease activity                                                                              | [167]     |
| Nicotinamide phosphoribosyltransferase | P43490 | Immunomodulatory effect                                                                               | [168]     |
| Non-secretory ribonuclease             | P10153 | Ribonuclease activity                                                                                 | [170]     |
| Peptidoglycan recognition protein 1    | O75594 | Antimicrobial activity                                                                                | [173]     |
| Phospholipase B-like 1                 | Q6P4A8 | Suggested antimicrobial<br>activity                                                                   | [175]     |
| Pigment epithelium-derived factor      | P36955 | Protease inhibitor                                                                                    | [176]     |
| Plasma kallikrein                      | P03952 | Serine protease activity                                                                              | [138]     |
| Plasma serine protease inhibitor       | P05154 | Protease inhibitor                                                                                    | [177]     |
| Plastin-2                              | P13796 | Immunomodulatory effect                                                                               | [178]     |
| Poly(rC)-binding protein 1             | Q15365 | Antiviral effect                                                                                      | [179]     |
| Pregnancy zone protein                 | P20742 | Protease inhibitor                                                                                    | [181]     |
| Procathepsin L                         | P07711 | Endopeptidase activity                                                                                | [60]      |
| Progranulin                            | P28799 | Immunomodulatory effect                                                                               | [184]     |
| Prolactin-inducible protein            | P12273 | Aspartic-type endopepti-<br>dase activity<br>Modulates the activity of<br>Zn- $\alpha$ 2 glycoprotein | [185,186] |
| Prosaposin                             | P07602 | Processed forms has antimi-<br>crobial effect                                                         | [191]     |
| Prostasin                              | Q16651 | Serine protease activity                                                                              | [192]     |
| Protein AMBP                           | P02760 | Protease inhibitor                                                                                    | [193]     |
| Protein S100-A10                       | P60903 | Immunomodulatory effect                                                                               | [196]     |
| Protein S100-A11                       | P31949 | Immunomodulatory effect                                                                               | [197]     |
| Protein S100-A12                       | P80511 | Immunomodulatory effect                                                                               | [196]     |
| Protein S100-A13                       | Q99584 | Immunomodulatory effect                                                                               | [198]     |
| Protein S100-A14                       | Q9HCY8 | Immunomodulatory effect                                                                               | [199]     |
| Protein S100-A2                        | P29034 | Immunomodulatory effect                                                                               | [200]     |
| Protein S100-A4                        | P26447 | Immunomodulatory effect                                                                               | [196]     |
| Protein S100-A7                        | P31151 | Immunomodulatory effect                                                                               | [196]     |
| Protein S100-A8                        | P05109 | Immunomodulatory effect                                                                               | [196]     |
| Protein S100-A9                        | P06702 | Immunomodulatory effect                                                                               | [196]     |
| Protein S100-P                         | P25815 | Immunomodulatory effect                                                                               | [196]     |
| Puromycin-sensitive aminopeptidase     | P55786 | Aminopeptidase activity                                                                               | [203]     |
| RelA-associated inhibitor              | Q8WUF5 | Antimicrobial activity<br>Immunomodulatory effect                                                     | [204]     |
| Retroviral-like aspartic protease 1    | Q53RT3 | Aspartic-type endopepti-<br>dase activity                                                             | [205]     |
| Ribonuclease 7                         | Q9H1E1 | Ribonuclease activity                                                                                 | [170]     |
| Ribonuclease pancreatic                | P07998 | Ribonuclease activity                                                                                 | [170]     |
| Ribonuclease T2                        | O00584 | Ribonuclease activity                                                                                 | [170]     |
| Secreted Ly-6/uPAR domain-containing   | P0DP57 | Immunomodulatory effect                                                                               | [247]     |

|                                          |        |                                            |           |
|------------------------------------------|--------|--------------------------------------------|-----------|
| protein 2                                |        |                                            |           |
| Secreted Ly-6/uPAR-related protein 1     | P55000 | Immunomodulatory effect                    | [206]     |
| Secretoglobulin family 1D member 2       | O95969 | Immunomodulatory effect                    | [207]     |
| Semenogelin-1                            | P04279 | Processed forms has antimicrobial activity | [209–211] |
| Semenogelin-2                            | Q02383 | Processed forms has antimicrobial activity | [209–211] |
| Serine protease 27                       | Q9BQR3 | Serine protease activity                   | [212]     |
| Serine protease 57                       | Q6UWY2 | Serine protease activity                   | [212]     |
| Serine protease HTRA1                    | Q92743 | Serine protease activity                   | [212]     |
| Serine protease inhibitor Kazal-type 5   | Q9NQ38 | Protease inhibitor                         | [213]     |
| Serine protease inhibitor Kazal-type 7   | P58062 | Protease inhibitor                         | [213]     |
| Serotransferrin                          | P02787 | Iron sequestration                         | [214]     |
| Serpin B10                               | P48595 | Protease inhibitor                         | [215]     |
| Serpin B12                               | Q96P63 | Protease inhibitor                         | [215]     |
| Serpin B13                               | Q9UIV8 | Protease inhibitor                         | [215]     |
| Serpin B3                                | P29508 | Protease inhibitor                         | [215]     |
| Serpin B4                                | P48594 | Protease inhibitor                         | [215]     |
| Serpin B5                                | P36952 | Protease inhibitor                         | [215]     |
| Serpin B6                                | P35237 | Protease inhibitor                         | [215]     |
| Serpin B7                                | O75635 | Protease inhibitor                         | [215]     |
| Serpin B8                                | P50452 | Protease inhibitor                         | [215]     |
| Serpin B9                                | P50453 | Protease inhibitor                         | [215]     |
| Serum amyloid A-1 protein                | P0DJI8 | Immunomodulatory effect                    | [216]     |
| Serum amyloid P-component                | P02743 | Antiviral effect                           | [217]     |
| Small proline-rich protein 3             | Q9UBC9 | Antimicrobial activity                     | [187]     |
| Syntenin-1                               | O00560 | Immunomodulatory effect                    | [219]     |
| Thioredoxin domain-containing protein 17 | Q9BRA2 | Immunomodulatory effect                    | [221]     |
| Thymosin beta-10                         | P63313 | Antimicrobial activity                     | [222]     |
| Thymosin beta-4                          | P62328 | Antimicrobial activity                     | [222]     |
| Thyroxine-binding globulin               | P05543 | Protease inhibitor                         | [223]     |
| Toll-interacting protein                 | Q9H0E2 | Immunomodulatory effect                    | [224]     |
| Transgelin-2                             | P37802 | Immunomodulatory effect                    | [226]     |
| Transmembrane protease serine 11A        | Q6ZMR5 | Serine protease activity                   | [227]     |
| Transmembrane protease serine 11B        | Q86T26 | Serine protease activity                   | [248]     |
| Transmembrane protease serine 11D        | O60235 | Serine protease activity                   | [228]     |
| Transmembrane protease serine 11E        | Q9UL52 | Serine protease activity                   | [229]     |
| Triokinase/FMN cyclase                   | Q3LXA3 | Immunomodulatory effect                    | [230]     |
| Tripeptidyl-peptidase 1                  | O14773 | Serine protease activity                   | [231]     |
| Vitamin D-binding protein                | P02774 | Immunomodulatory effect                    | [239]     |
| WAP four-disulfide core domain protein 2 | Q14508 | Protease inhibitor                         | [240]     |
| Zinc-alpha-2-glycoprotein                | P25311 | Immunomodulatory effect                    | [243]     |

**Table S8.** Proteins involved in the first line of host defense in the seminal fluid.

| Protein name                                 | UniProt entry | Function                                          | Reference |
|----------------------------------------------|---------------|---------------------------------------------------|-----------|
| Acrosin                                      | P10323        | Serine protease activity                          | [1]       |
| Alpha-1-acid glycoprotein 1                  | P02763        | Immunomodulatory effect                           | [3]       |
| Alpha-1-acid glycoprotein 2                  | P19652        | Immunomodulatory effect                           | [3]       |
| Alpha-1-antichymotrypsin                     | P01011        | Protease inhibitor                                | [4]       |
| Alpha-1-antitrypsin                          | P01009        | Protease inhibitor                                | [5]       |
| Alpha-1B-glycoprotein                        | P04217        | Immunomodulatory effect                           | [6]       |
| Alpha-2-antiplasmin                          | P08697        | Protease inhibitor                                | [7]       |
| Alpha-2-macroglobulin                        | P01023        | Protease inhibitor                                | [9]       |
| Alpha-2-macroglobulin-like protein 1         | A8K2U0        | Protease inhibitor                                | [10]      |
| Alpha-amylase 1A                             | P0DUB6        | Regulation of biofilm formation                   | [11]      |
| Alpha-amylase 1B                             | P0DTE7        | Regulation of biofilm formation                   | [11]      |
| Alpha-amylase 1C                             | P0DTE8        | Regulation of biofilm formation                   | [11]      |
| Alpha-amylase 2B                             | P19961        | Regulation of biofilm formation                   | [11]      |
| Aminopeptidase B                             | Q9H4A4        | Exopeptidase activity                             | [12]      |
| Aminopeptidase N                             | P15144        | Exopeptidase activity                             | [13]      |
| Amyloid-beta precursor protein               | P05067        | Antimicrobial activity                            | [15]      |
| Angiogenin                                   | P03950        | Antimicrobial activity                            | [16]      |
| Antileukoproteinase                          | P03973        | Protease inhibitor<br>Immunomodulatory effect     | [17,18]   |
| Antithrombin-III                             | P01008        | Protease inhibitor                                | [19]      |
| Apolipoprotein A-I                           | P02647        | Antimicrobial activity                            | [20]      |
| Apolipoprotein A-II                          | P02652        | Immunomodulatory effect                           | [21]      |
| Apolipoprotein A-IV                          | P06727        | Immunomodulatory effect                           | [22]      |
| Apolipoprotein B-100                         | P04114        | Antimicrobial activity                            | [23]      |
| Apolipoprotein D                             | P05090        | Immunomodulatory effect                           | [26]      |
| Apolipoprotein E                             | P02649        | Immunomodulatory effect                           | [27]      |
| Arginase-1                                   | P05089        | Antifungal activity<br>Immunomodulatory effect    | [30,31]   |
| Aspartyl aminopeptidase                      | Q9ULA0        | Exopeptidase activity                             | [32]      |
| Azurocidin                                   | P20160        | Antimicrobial activity                            | [33]      |
| Bactericidal permeability-increasing protein | P17213        | Antimicrobial activity                            | [33,34]   |
| Beta-2-glycoprotein 1                        | P02749        | Immunomodulatory effect                           | [35]      |
| Beta-2-microglobulin                         | P61769        | Antimicrobial activity<br>Immunomodulatory effect | [36,37]   |
| Beta-defensin 105                            | Q8NG35        | Antimicrobial activity                            | [33]      |
| Beta-defensin 106                            | Q8N104        | Antimicrobial activity                            | [33]      |
| Beta-defensin 118                            | Q96PH6        | Antimicrobial activity                            | [33]      |
| Beta-defensin 129                            | Q9H1M3        | Antimicrobial activity                            | [33]      |
| Beta-defensin 131A                           | P59861        | Antimicrobial activity                            | [33]      |
| Beta-defensin 132                            | Q7Z7B7        | Antimicrobial activity                            | [33]      |

|                                       |        |                                                   |       |
|---------------------------------------|--------|---------------------------------------------------|-------|
| Beta-hexosaminidase subunit alpha     | P06865 | Antimicrobial activity                            | [39]  |
| Beta-hexosaminidase subunit beta      | P07686 | Antimicrobial activity                            | [39]  |
| BPI fold-containing family A member 3 | Q9BQP9 | Antimicrobial activity                            | [43]  |
| BPI fold-containing family B member 2 | Q8N4F0 | Antimicrobial activity                            | [44]  |
| Brain-specific serine protease 4      | Q9GZN4 | Serine protease activity                          | [47]  |
| Calpain-1 catalytic subunit           | P07384 | Endopeptidase activity<br>Immunomodulatory effect | [49]  |
| Calpain-11                            | Q9UMQ6 | Endopeptidase activity<br>Immunomodulatory effect | [49]  |
| Calpain-2 catalytic subunit           | P17655 | Endopeptidase activity<br>Immunomodulatory effect | [49]  |
| Calpain-5                             | O15484 | Endopeptidase activity<br>Immunomodulatory effect | [49]  |
| Calpain-7                             | Q9Y6W3 | Endopeptidase activity<br>Immunomodulatory effect | [49]  |
| Calpastatin                           | P20810 | Protease inhibitor                                | [50]  |
| Carboxypeptidase A5                   | Q8WXQ8 | Carboxypeptidase activity                         | [51]  |
| Carboxypeptidase B                    | P15086 | Carboxypeptidase activity                         | [52]  |
| Carboxypeptidase D                    | O75976 | Carboxypeptidase activity                         | [53]  |
| Carboxypeptidase E                    | P16870 | Carboxypeptidase activity                         | [53]  |
| Carboxypeptidase M                    | P14384 | Carboxypeptidase activity                         | [54]  |
| Carboxypeptidase Q                    | Q9Y646 | Carboxypeptidase activity                         | [56]  |
| Carboxypeptidase Z                    | Q66K79 | Carboxypeptidase activity                         | [251] |
| Catalase                              | P04040 | Antimicrobial activity                            | [59]  |
| Cathelicidin antimicrobial peptide    | P49913 | Antimicrobial activity                            | [33]  |
| Cathepsin B                           | P07858 | Endopeptidase activity                            | [60]  |
| Cathepsin D                           | P07339 | Endopeptidase activity                            | [60]  |
| Cathepsin F                           | Q9UBX1 | Endopeptidase activity                            | [60]  |
| Cathepsin G                           | P08311 | Endopeptidase activity                            | [60]  |
| Cathepsin L2                          | O60911 | Endopeptidase activity                            | [60]  |
| Cathepsin O                           | P43234 | Endopeptidase activity                            | [60]  |
| Cathepsin S                           | P25774 | Endopeptidase activity                            | [60]  |
| Cathepsin Z                           | Q9UBR2 | Endopeptidase activity                            | [60]  |
| Ceruloplasmin                         | P00450 | Cu <sup>2+</sup> sequestering activity            | [62]  |
| Chitinase-3-like protein 1            | P36222 | Antimicrobial activity                            | [63]  |
| Chromogranin-A                        | P10645 | Processed forms have anti-<br>microbial activity  | [65]  |
| Clusterin                             | P10909 | Immunomodulatory effect                           | [66]  |
| Collagen alpha-1(XII) chain           | Q99715 | Immunomodulatory effect                           | [67]  |
| Core histone macro-H2A.1              | O75367 | Antimicrobial activity                            | [68]  |
| Corticosteroid-binding globulin       | P08185 | Protease inhibitor                                | [69]  |
| C-reactive protein                    | P02741 | Acute phase protein                               | [70]  |
| Cystatin-A                            | P01040 | Protease inhibitor                                | [71]  |
| Cystatin-B                            | P04080 | Protease inhibitor                                | [71]  |
| Cystatin-C                            | P01034 | Protease inhibitor                                | [71]  |

|                                                                |        |                                                   |           |
|----------------------------------------------------------------|--------|---------------------------------------------------|-----------|
| Cystatin-S                                                     | P01036 | Protease inhibitor                                | [71]      |
| Cystatin-SA                                                    | P09228 | Protease inhibitor                                | [71]      |
| Cystatin-SN                                                    | P01037 | Protease inhibitor                                | [71]      |
| Cytosol aminopeptidase                                         | P28838 | Aminopeptidase activity                           | [72]      |
| Cytosolic carboxypeptidase 1                                   | Q9UPW5 | Carboxypeptidase activity                         | [73]      |
| Cytosolic non-specific dipeptidase                             | Q96KP4 | Carboxypeptidase activity                         | [75]      |
| Deoxyribonuclease-1                                            | P24855 | Endonuclease activity                             | [78]      |
| Dermcidin                                                      | P81605 | Antimicrobial activity                            | [33]      |
| Dipeptidase 1                                                  | P16444 | Carboxypeptidase activity                         | [79]      |
| Dipeptidase 2                                                  | Q9H4A9 | Carboxypeptidase activity                         | [80]      |
| Dipeptidase 3                                                  | Q9H4B8 | Carboxypeptidase activity                         | [80]      |
| Dipeptidyl peptidase 1                                         | P53634 | Carboxypeptidase activity                         | [81]      |
| Dipeptidyl peptidase 2                                         | Q9UHL4 | Carboxypeptidase activity                         | [82]      |
| Dipeptidyl peptidase 3                                         | Q9NY33 | Carboxypeptidase activity                         | [83]      |
| Dipeptidyl peptidase 4                                         | P27487 | Carboxypeptidase activity                         | [84]      |
| Dipeptidyl peptidase 8                                         | Q6V1X1 | Carboxypeptidase activity                         | [85]      |
| Disintegrin and metalloproteinase domain-containing protein 10 | O14672 | Metalloendopeptidase activity                     | [86]      |
| Disintegrin and metalloproteinase domain-containing protein 29 | Q9UKF5 | Metalloendopeptidase activity                     | [86]      |
| Disintegrin and metalloproteinase domain-containing protein 30 | Q9UKF2 | Metalloendopeptidase activity                     | [86]      |
| Disintegrin and metalloproteinase domain-containing protein 32 | Q8TC27 | Metalloendopeptidase activity                     | [86]      |
| Disintegrin and metalloproteinase domain-containing protein 7  | Q9H2U9 | Metalloendopeptidase activity                     | [86]      |
| Disintegrin and metalloproteinase domain-containing protein 9  | Q13443 | Metalloendopeptidase activity                     | [86]      |
| Drebrin-like protein                                           | Q9UJU6 | Immunomodulatory effect                           | [87]      |
| Endoplasmic reticulum aminopeptidase 1                         | Q9NZ08 | Aminopeptidase activity                           | [89]      |
| Eosinophil cationic protein                                    | P12724 | Antimicrobial activity                            | [90]      |
| Eosinophil peroxidase                                          | P11678 | Antimicrobial activity                            | [91]      |
| Fatty acid-binding protein 5                                   | Q01469 | Immunomodulatory effect                           | [94]      |
| Galectin-1                                                     | P09382 | Immunomodulatory effect                           | [101]     |
| Galectin-3                                                     | P17931 | Immunomodulatory effect                           | [103]     |
| Galectin-3-binding protein                                     | Q08380 | Antimicrobial activity<br>Immunomodulatory effect | [104,105] |
| Galectin-7                                                     | P47929 | Immunomodulatory effect                           | [106]     |
| Gastricsin                                                     | P20142 | Aspartic-type endopeptidase activity              | [108]     |
| Gelsolin                                                       | P06396 | Processed from has antimicrobial activity         | [109]     |
| Glucose-6-phosphate isomerase                                  | P06744 | Induces immunoglobulin secretion                  | [111]     |
| Glutamate carboxypeptidase 2                                   | Q04609 | Carboxypeptidase activity                         | [112]     |

|                                          |        |                                                                  |       |
|------------------------------------------|--------|------------------------------------------------------------------|-------|
| Glutathione S-transferase omega-1        | P78417 | Immunomodulatory effect                                          | [114] |
| Glutathione S-transferase P              | P09211 | Immunomodulatory effect                                          | [115] |
| Glyceraldehyde-3-phosphate dehydrogenase | P04406 | Immunomodulatory effect                                          | [116] |
| Growth-regulated alpha protein           | P09341 | Antimicrobial activity                                           | [118] |
| Haptoglobin                              | P00738 | Immunomodulatory effect<br>Iron sequestering                     | [122] |
| Heme-binding protein 1                   | Q9NRV9 | Heme/iron sequestration                                          | [124] |
| Heme-binding protein 2                   | Q9Y5Z4 | Heme/iron sequestration                                          | [124] |
| Hemoglobin subunit alpha                 | P69905 | Processed forms (hemo-<br>cidins) have antimicrobial<br>activity | [125] |
| Hemoglobin subunit beta                  | P68871 | Processed forms (hemo-<br>cidins) have antimicrobial<br>activity | [125] |
| Hemopexin                                | P02790 | Antibacterail effect<br>Anti-inflammatory effect                 | [126] |
| High mobility group protein B1           | P09429 | Immunomodulatory effect                                          | [130] |
| High mobility group protein B2           | P26583 | Antimicrobial activity                                           | [131] |
| High mobility group protein B4           | Q8WW32 | Immunomodulatory effect                                          | [132] |
| Histidine-rich glycoprotein              | P04196 | Antimicrobial activity                                           | [133] |
| Histone H1.1                             | Q02539 | Antimicrobial activity                                           | [134] |
| Histone H1.2                             | P16403 | Antimicrobial activity                                           | [134] |
| Histone H1.3                             | P16402 | Antimicrobial activity                                           | [134] |
| Histone H1.4                             | P10412 | Antimicrobial activity                                           | [134] |
| Histone H1.5                             | P16401 | Antimicrobial activity                                           | [134] |
| Histone H1t                              | P22492 | Antimicrobial activity                                           | [134] |
| Histone H2A type 1                       | P0C0S8 | Antimicrobial activity                                           | [134] |
| Histone H2A type 1-A                     | Q96QV6 | Antimicrobial activity                                           | [134] |
| Histone H2A type 1-B/E                   | P04908 | Antimicrobial activity                                           | [134] |
| Histone H2A type 1-C                     | Q93077 | Antimicrobial activity                                           | [134] |
| Histone H2A type 1-D                     | P20671 | Antimicrobial activity                                           | [134] |
| Histone H2A type 1-H                     | Q96KK5 | Antimicrobial activity                                           | [134] |
| Histone H2A type 1-J                     | Q99878 | Antimicrobial activity                                           | [134] |
| Histone H2A type 2-A                     | Q6FI13 | Antimicrobial activity                                           | [134] |
| Histone H2A type 2-B                     | Q8IUE6 | Antimicrobial activity                                           | [134] |
| Histone H2A type 2-C                     | Q16777 | Antimicrobial activity                                           | [134] |
| Histone H2A type 3                       | Q7L7L0 | Antimicrobial activity                                           | [134] |
| Histone H2A.J                            | Q9BTM1 | Antimicrobial activity                                           | [134] |
| Histone H2A.V                            | Q71UI9 | Antimicrobial activity                                           | [134] |
| Histone H2A.Z                            | P0C0S5 | Antimicrobial activity                                           | [134] |
| Histone H2A-Bbd type 2/3                 | P0C5Z0 | Antimicrobial activity                                           | [134] |
| Histone H2AX                             | P16104 | Antimicrobial activity                                           | [134] |
| Histone H2B type 1-A                     | Q96A08 | Antimicrobial activity                                           | [134] |
| Histone H2B type 1-B                     | P33778 | Antimicrobial activity                                           | [134] |

|                                              |        |                                               |           |
|----------------------------------------------|--------|-----------------------------------------------|-----------|
| Histone H2B type 1-C/E/F/G/I                 | P62807 | Antimicrobial activity                        | [134]     |
| Histone H2B type 1-D                         | P58876 | Antimicrobial activity                        | [134]     |
| Histone H2B type 1-H                         | Q93079 | Antimicrobial activity                        | [134]     |
| Histone H2B type 1-J                         | P06899 | Antimicrobial activity                        | [134]     |
| Histone H2B type 1-K                         | O60814 | Antimicrobial activity                        | [134]     |
| Histone H2B type 1-L                         | Q99880 | Antimicrobial activity                        | [134]     |
| Histone H2B type 1-M                         | Q99879 | Antimicrobial activity                        | [134]     |
| Histone H2B type 1-N                         | Q99877 | Antimicrobial activity                        | [134]     |
| Histone H2B type 1-O                         | P23527 | Antimicrobial activity                        | [134]     |
| Histone H2B type 2-E                         | Q16778 | Antimicrobial activity                        | [134]     |
| Histone H2B type 2-F                         | Q5QNW6 | Antimicrobial activity                        | [134]     |
| Histone H2B type F-S                         | P57053 | Antimicrobial activity                        | [134]     |
| Histone H3.1                                 | P68431 | Antimicrobial activity                        | [134]     |
| Histone H3.2                                 | Q71DI3 | Antimicrobial activity                        | [134]     |
| Histone H3.3                                 | P84243 | Antimicrobial activity                        | [134]     |
| Histone H3.3C                                | Q6NXT2 | Antimicrobial activity                        | [134]     |
| Histone H3-7                                 | Q5TEC6 | Antimicrobial activity                        | [134]     |
| Histone H4                                   | P62805 | Antimicrobial activity                        | [134]     |
| Inter-alpha-trypsin inhibitor heavy chain H5 | Q86UX2 | Protease inhibitor                            | [135]     |
| Kallikrein-11                                | Q9UBX7 | Serine protease activity                      | [138]     |
| Kallikrein-2                                 | P20151 | Serine protease activity                      | [138]     |
| Kallikrein-3                                 | P07288 | Serine protease activity                      | [138]     |
| Kunitz-type protease inhibitor 1             | O43278 | Protease inhibitor                            | [142]     |
| Kunitz-type protease inhibitor 2             | O43291 | Protease inhibitor                            | [142]     |
| Kunitz-type protease inhibitor 3             | P49223 | Protease inhibitor                            | [142]     |
| Kunitz-type protease inhibitor 4             | Q6UDR6 | Protease inhibitor                            | [142]     |
| Lactotransferrin                             | P02788 | Antimicrobial activity<br>Iron sequestration  | [33]      |
| Legumain                                     | Q99538 | Endopeptidase activity                        | [144]     |
| Leukocyte elastase inhibitor                 | P30740 | Protease inhibitor                            | [145]     |
| Lipocalin-1                                  | P31025 | Immunomodulatory effect<br>Iron sequestration | [146,147] |
| Lipocalin-2                                  | P80188 | Immunomodulatory effect<br>Iron sequestration | [146,147] |
| Lysozyme C                                   | P61626 | Antimicrobial activity                        | [33]      |
| Macrophage migration inhibitory factor       | P14174 | Antimicrobial activity                        | [151]     |
| Major vault protein                          | Q14764 | Immunomodulatory effect                       | [152]     |
| Mammaglobin-B                                | O75556 | Immunomodulatory effect                       | [153]     |
| Matrix metalloproteinase-9                   | P14780 | Metalloprotease activity                      | [155]     |
| Metalloproteinase inhibitor 1                | P01033 | Protease Inhibitor                            | [157]     |
| Metalloproteinase inhibitor 2                | P16035 | Protease Inhibitor                            | [157]     |
| Metalloproteinase inhibitor 3                | P35625 | Protease Inhibitor                            | [157]     |
| Midkine                                      | P21741 | Immunomodulatory effect                       | [158]     |
| Moesin                                       | P26038 | Immunomodulatory effect                       | [159]     |

|                                        |        |                                                                                                       |           |
|----------------------------------------|--------|-------------------------------------------------------------------------------------------------------|-----------|
| Mucin-15                               | Q8N387 | Antimicrobial activity                                                                                | [160]     |
| Mucin-4                                | Q99102 | Antimicrobial activity                                                                                | [160]     |
| Mucin-5AC                              | P98088 | Antimicrobial activity                                                                                | [160]     |
| Mucin-5B                               | Q9HC84 | Antimicrobial activity                                                                                | [160]     |
| Mucin-6                                | Q6W4X9 | Antimicrobial activity                                                                                | [160]     |
| Myeloblastin                           | P24158 | Serine protease activity                                                                              | [161]     |
| Myeloperoxidase                        | P05164 | Antimicrobial activity                                                                                | [162]     |
| Myoglobin                              | P02144 | Processed forms (hemo-<br>cidins) have antimicrobial<br>activity                                      | [163]     |
| Neprilysin                             | P08473 | Endopeptidase activity                                                                                | [165]     |
| Neutrophil collagenase                 | P22894 | Endopeptidase activity<br>Immunomodulatory effect                                                     | [166]     |
| Neutrophil defensin 1                  | P59665 | Antimicrobial activity                                                                                | [33]      |
| Neutrophil defensin 3                  | P59666 | Antimicrobial activity                                                                                | [33]      |
| Neutrophil elastase                    | P08246 | Serine protease activity                                                                              | [167]     |
| Nicotinamide phosphoribosyltransferase | P43490 | Immunomodulatory effect                                                                               | [168]     |
| Non-secretory ribonuclease             | P10153 | Ribonuclease activity                                                                                 | [170]     |
| Peptidase inhibitor 16                 | Q6UXB8 | Protease inhibitor                                                                                    | [172]     |
| Phospholipase B-like 1                 | Q6P4A8 | Suggested antimicrobial<br>activity                                                                   | [175]     |
| Pigment epithelium-derived factor      | P36955 | Protease inhibitor                                                                                    | [176]     |
| Plasma serine protease inhibitor       | P05154 | Protease inhibitor                                                                                    | [177]     |
| Plastin-2                              | P13796 | Immunomodulatory effect                                                                               | [178]     |
| Poly(rC)-binding protein 1             | Q15365 | Antiviral effect                                                                                      | [179]     |
| Poly(rC)-binding protein 2             | Q15366 | Antiviral effect                                                                                      | [180]     |
| Pro-cathepsin H                        | P09668 | Endopeptidase activity                                                                                | [60]      |
| Procathepsin L                         | P07711 | Endopeptidase activity                                                                                | [60]      |
| Progranulin                            | P28799 | Immunomodulatory effect                                                                               | [184]     |
| Prolactin-inducible protein            | P12273 | Aspartic-type endopepti-<br>dase activity<br>Modulates the activity of<br>Zn- $\alpha$ 2 glycoprotein | [185,186] |
| Proline-rich protein 30                | Q53SZ7 | Antimicrobial activity                                                                                | [187]     |
| Prolyl endopeptidase                   | P48147 | Endopeptidase activity                                                                                | [188]     |
| Prosaposin                             | P07602 | Processed forms has anti-<br>microbial effect                                                         | [191]     |
| Prostasin                              | Q16651 | Serine protease activity                                                                              | [192]     |
| Protein AMBP                           | P02760 | Protease inhibitor                                                                                    | [193]     |
| Protein S100-A10                       | P60903 | Immunomodulatory effect                                                                               | [196]     |
| Protein S100-A11                       | P31949 | Immunomodulatory effect                                                                               | [197]     |
| Protein S100-A12                       | P80511 | Immunomodulatory effect                                                                               | [196]     |
| Protein S100-A14                       | Q9HCY8 | Immunomodulatory effect                                                                               | [199]     |
| Protein S100-A2                        | P29034 | Immunomodulatory effect                                                                               | [200]     |
| Protein S100-A7                        | P31151 | Immunomodulatory effect                                                                               | [196]     |
| Protein S100-A8                        | P05109 | Immunomodulatory effect                                                                               | [196]     |



|                                          |        |                                             |           |
|------------------------------------------|--------|---------------------------------------------|-----------|
| Protein S100-A9                          | P06702 | Immunomodulatory effect                     | [196]     |
| Protein S100-P                           | P25815 | Immunomodulatory effect                     | [196]     |
| Protein WFDC9                            | Q8NEX5 | Protease inhibitor                          | [202]     |
| Puromycin-sensitive aminopeptidase       | P55786 | Aminopeptidase activity                     | [203]     |
| RelA-associated inhibitor                | Q8WUF5 | Antiviral effect<br>Immunomodulatory effect | [204]     |
| Ribonuclease 4                           | P34096 | Ribonuclease activity                       | [170]     |
| Ribonuclease pancreatic                  | P07998 | Ribonuclease activity                       | [170]     |
| Ribonuclease T2                          | O00584 | Ribonuclease activity                       | [170]     |
| Secretoglobin family 1D member 2         | O95969 | Immunomodulatory effect                     | [207]     |
| Semenogelin-1                            | P04279 | Processed forms has antimicrobial activity  | [209–211] |
| Semenogelin-2                            | Q02383 | Processed forms has antimicrobial activity  | [209–211] |
| Serine protease 1                        | P07477 | Serine protease activity                    | [212]     |
| Serine protease 23                       | O95084 | Serine protease activity                    | [212]     |
| Serine protease 55                       | Q6UWB4 | Serine protease activity                    | [212]     |
| Serine protease 58                       | Q8IYP2 | Serine protease activity                    | [212]     |
| Serine protease HTRA1                    | Q92743 | Serine protease activity                    | [212]     |
| Serine protease HTRA2                    | O43464 | Serine protease activity                    | [212]     |
| Serine protease inhibitor Kazal-type 2   | P20155 | Protease inhibitor                          | [213]     |
| Serotransferrin                          | P02787 | Iron sequestration                          | [214]     |
| Serpin B10                               | P48595 | Protease inhibitor                          | [215]     |
| Serpin B12                               | Q96P63 | Protease inhibitor                          | [215]     |
| Serpin B3                                | P29508 | Protease inhibitor                          | [215]     |
| Serpin B4                                | P48594 | Protease inhibitor                          | [215]     |
| Serpin B5                                | P36952 | Protease inhibitor                          | [215]     |
| Serpin B6                                | P35237 | Protease inhibitor                          | [215]     |
| Serpin B7                                | O75635 | Protease inhibitor                          | [215]     |
| Serpin B8                                | P50452 | Protease inhibitor                          | [215]     |
| Serpin B9                                | P50453 | Protease inhibitor                          | [215]     |
| Serum amyloid A-1 protein                | P0DJ18 | Immunomodulatory effect                     | [216]     |
| Serum amyloid A-2 protein                | P0DJ19 | Immunomodulatory effect                     | [216]     |
| Serum amyloid P-component                | P02743 | Antiviral effect                            | [217]     |
| Small proline-rich protein 3             | Q9UBC9 | Antimicrobial effect                        | [187]     |
| Sperm-associated antigen 11B             | Q08648 | Antimicrobial activity                      | [255]     |
| Syntenin-1                               | O00560 | Immunomodulatory effect                     | [219]     |
| T-cell immunomodulatory protein          | Q8TB96 | Immunomodulatory effect                     | [220]     |
| Testis-specific H1 histone               | Q75WM6 | Antimicrobial activity                      | [134]     |
| Thioredoxin domain-containing protein 17 | Q9BRA2 | Immunomodulatory effect                     | [221]     |
| Thymosin beta-10                         | P63313 | Antimicrobial activity                      | [222]     |
| Thymosin beta-4                          | P62328 | Antimicrobial activity                      | [222]     |
| Thyroxine-binding globulin               | P05543 | Protease inhibitor                          | [223]     |
| Toll-interacting protein                 | Q9H0E2 | Immunomodulatory effect                     | [224]     |

|                                          |        |                           |           |
|------------------------------------------|--------|---------------------------|-----------|
| Transgelin-2                             | P37802 | Immunomodulatory effect   | [226]     |
| Triokinase/FMN cyclase                   | Q3LXA3 | Immunomodulatory effect   | [230]     |
| Tripeptidyl-peptidase 1                  | O14773 | Serine protease activity  | [231]     |
| Tripeptidyl-peptidase 2                  | P29144 | Serine protease activity  | [232]     |
| Trypsin-3                                | P35030 | Serine protease activity  | [234]     |
| Uromodulin                               | P07911 | Antimicrobial activity    | [236,237] |
| Vitamin D-binding protein                | P02774 | Immunomodulatory effect   | [239]     |
| WAP four-disulfide core domain protein 2 | Q14508 | Protease inhibitor        | [240]     |
| WAP four-disulfide core domain protein 8 | Q8IUA0 | Protease inhibitor        | [240]     |
| Xaa-Pro aminopeptidase 1                 | Q9NQW7 | Aminopeptidase activity   | [241]     |
| Xaa-Pro aminopeptidase 3                 | Q9NQH7 | Aminopeptidase activity   | [241]     |
| Xaa-Pro dipeptidase                      | P12955 | Carboxypeptidase activity | [242]     |
| Zinc-alpha-2-glycoprotein                | P25311 | Immunomodulatory effect   | [243]     |
| Zymogen granule membrane protein 16      | O60844 | Antimicrobial activity    | [244]     |
| Zymogen granule protein 16 homolog B     | Q96DA0 | Antimicrobial activity    | [245]     |

**Table S9.** Proteins involved in the first line of host defense in CSF.

| Protein name                   | UniProt entry | Function                                      | Reference |
|--------------------------------|---------------|-----------------------------------------------|-----------|
| ADAM DEC1                      | O15204        | Immunomodulatory effect                       | [2]       |
| Alpha-1-acid glycoprotein 1    | P02763        | Immunomodulatory effect                       | [3]       |
| Alpha-1-acid glycoprotein 2    | P19652        | Immunomodulatory effect                       | [3]       |
| Alpha-1-antichymotrypsin       | P01011        | Protease inhibitor                            | [4]       |
| Alpha-1-antitrypsin            | P01009        | Protease inhibitor                            | [5]       |
| Alpha-1B-glycoprotein          | P04217        | Immunomodulatory effect                       | [6]       |
| Alpha-2-antiplasmin            | P08697        | Protease inhibitor                            | [7]       |
| Alpha-2-HS-glycoprotein        | P02765        | Anti-inflammatory effect                      | [8]       |
| Alpha-2-macroglobulin          | P01023        | Protease inhibitor                            | [9]       |
| Alpha-amylase 1A               | P0DUB6        | Regulation of biofilm formation               | [11]      |
| Alpha-amylase 1B               | P0DTE7        | Regulation of biofilm formation               | [11]      |
| Alpha-amylase 1C               | P0DTE8        | Regulation of biofilm formation               | [11]      |
| Alpha-amylase 2B               | P19961        | Regulation of biofilm formation               | [11]      |
| Aminopeptidase B               | Q9H4A4        | Exopeptidase activity                         | [12]      |
| Aminopeptidase N               | P15144        | Exopeptidase activity                         | [13]      |
| Amyloid-beta precursor protein | P05067        | Antimicrobial activity                        | [15]      |
| Angiogenin                     | P03950        | Antimicrobial activity                        | [16]      |
| Antileukoproteinase            | P03973        | Protease inhibitor<br>Immunomodulatory effect | [17,18]   |
| Antithrombin-III               | P01008        | Protease inhibitor                            | [19]      |
| Apolipoprotein A-I             | P02647        | Antimicrobial activity                        | [20]      |
| Apolipoprotein A-II            | P02652        | Immunomodulatory effect                       | [21]      |

|                                                              |        |                                                   |         |
|--------------------------------------------------------------|--------|---------------------------------------------------|---------|
| Apolipoprotein A-IV                                          | P06727 | Immunomodulatory effect                           | [22]    |
| Apolipoprotein B-100                                         | P04114 | Antimicrobial activity                            | [23]    |
| Apolipoprotein C-III                                         | P02656 | Immunomodulatory effect                           | [24]    |
| Apolipoprotein D                                             | P05090 | Immunomodulatory effect                           | [26]    |
| Apolipoprotein E                                             | P02649 | Immunomodulatory effect                           | [27]    |
| Apolipoprotein L1                                            | O14791 | Immunomodulatory effect                           | [28]    |
| Apolipoprotein M                                             | O95445 | Immunomodulatory effect                           | [29]    |
| Arginase-1                                                   | P05089 | Antifungal activity<br>Immunomodulatory effect    | [30,31] |
| Aspartyl aminopeptidase                                      | Q9ULA0 | Exopeptidase activity                             | [32]    |
| Azurocidin                                                   | P20160 | Antimicrobial activity                            | [33]    |
| Bactericidal permeability-increasing protein                 | P17213 | Antimicrobial activity                            | [33,34] |
| Beta-2-glycoprotein 1                                        | P02749 | Immunomodulatory effect                           | [35]    |
| Beta-2-microglobulin                                         | P61769 | Antimicrobial activity<br>Immunomodulatory effect | [36,37] |
| Beta-Ala-His dipeptidase                                     | Q96KN2 | Carboxypeptidase activity                         | [38]    |
| Beta-defensin 1                                              | P60022 | Antimicrobial activity                            | [33]    |
| Beta-defensin 103                                            | P81534 | Antimicrobial activity                            | [33]    |
| Beta-hexosaminidase subunit alpha                            | P06865 | Antimicrobial activity                            | [39]    |
| Beta-hexosaminidase subunit beta                             | P07686 | Antimicrobial activity                            | [39]    |
| Bone marrow stromal antigen 2                                | Q10589 | Antiviral effect                                  | [40]    |
| Calcitonin gene-related peptide 1                            | P06881 | Antimicrobial activity                            | [48]    |
| Calpain-1 catalytic subunit                                  | P07384 | Endopeptidase activity<br>Immunomodulatory effect | [49]    |
| Calpain-2 catalytic subunit                                  | P17655 | Endopeptidase activity<br>Immunomodulatory effect | [49]    |
| Calpain-5                                                    | O15484 | Endopeptidase activity<br>Immunomodulatory effect | [49]    |
| Calpastatin                                                  | P20810 | Protease inhibitor                                | [50]    |
| Carboxypeptidase A1                                          | P15085 | Carboxypeptidase activity                         | [51]    |
| Carboxypeptidase A2                                          | P48052 | Carboxypeptidase activity                         | [51]    |
| Carboxypeptidase A4                                          | Q9UI42 | Carboxypeptidase activity                         | [51]    |
| Carboxypeptidase A5                                          | Q8WXQ8 | Carboxypeptidase activity                         | [51]    |
| Carboxypeptidase B                                           | P15086 | Carboxypeptidase activity                         | [52]    |
| Carboxypeptidase B2                                          | Q96IY4 | Carboxypeptidase activity                         | [52]    |
| Carboxypeptidase D                                           | O75976 | Carboxypeptidase activity                         | [53]    |
| Carboxypeptidase E                                           | P16870 | Carboxypeptidase activity                         | [53]    |
| Carboxypeptidase M                                           | P14384 | Carboxypeptidase activity                         | [54]    |
| Carboxypeptidase N catalytic chain                           | P15169 | Carboxypeptidase activity                         | [55]    |
| Carboxypeptidase Q                                           | Q9Y646 | Carboxypeptidase activity                         | [56]    |
| Carboxypeptidase Z                                           | Q66K79 | Carboxypeptidase activity                         | [251]   |
| Carcinoembryonic antigen-related cell<br>adhesion molecule 1 | P13688 | Immunomodulatory effect                           | [57]    |
| Catalase                                                     | P04040 | Antimicrobial activity                            | [59]    |
| Cathelicidin antimicrobial peptide                           | P49913 | Antimicrobial activity                            | [33]    |

---

|                                                                |        |                                              |      |
|----------------------------------------------------------------|--------|----------------------------------------------|------|
| Cathepsin B                                                    | P07858 | Endopeptidase activity                       | [60] |
| Cathepsin D                                                    | P07339 | Endopeptidase activity                       | [60] |
| Cathepsin F                                                    | Q9UBX1 | Endopeptidase activity                       | [60] |
| Cathepsin G                                                    | P08311 | Endopeptidase activity                       | [60] |
| Cathepsin L2                                                   | O60911 | Endopeptidase activity                       | [60] |
| Cathepsin O                                                    | P43234 | Endopeptidase activity                       | [60] |
| Cathepsin S                                                    | P25774 | Endopeptidase activity                       | [60] |
| Cathepsin Z                                                    | Q9UBR2 | Endopeptidase activity                       | [60] |
| Cell surface glycoprotein MUC18                                | P43121 | Immunomodulatory effect                      | [61] |
| Ceruloplasmin                                                  | P00450 | Cu <sup>2+</sup> sequestering activity       | [62] |
| Chitinase-3-like protein 1                                     | P36222 | Antimicrobial activity                       | [63] |
| Chitotriosidase-1                                              | Q13231 | Antifungal activity                          | [64] |
| Chromogranin-A                                                 | P10645 | Processed forms have anti-microbial activity | [65] |
| Clusterin                                                      | P10909 | Immunomodulatory effect                      | [66] |
| Collagen alpha-1(XII) chain                                    | Q99715 | Immunomodulatory effect                      | [67] |
| Core histone macro-H2A.1                                       | O75367 | Antimicrobial activity                       | [68] |
| Corticosteroid-binding globulin                                | P08185 | Protease inhibitor                           | [69] |
| C-reactive protein                                             | P02741 | Acute phase protein                          | [70] |
| Cystatin-A                                                     | P01040 | Protease inhibitor                           | [71] |
| Cystatin-B                                                     | P04080 | Protease inhibitor                           | [71] |
| Cystatin-C                                                     | P01034 | Protease inhibitor                           | [71] |
| Cystatin-F                                                     | O76096 | Protease inhibitor                           | [71] |
| Cystatin-M                                                     | Q15828 | Protease inhibitor                           | [71] |
| Cystatin-S                                                     | P01036 | Protease inhibitor                           | [71] |
| Cystatin-SA                                                    | P09228 | Protease inhibitor                           | [71] |
| Cystatin-SN                                                    | P01037 | Protease inhibitor                           | [71] |
| Cytosol aminopeptidase                                         | P28838 | Aminopeptidase activity                      | [72] |
| Cytosolic non-specific dipeptidase                             | Q96KP4 | Carboxypeptidase activity                    | [75] |
| Deoxyribonuclease-1                                            | P24855 | Endonuclease activity                        | [78] |
| Dermcidin                                                      | P81605 | Antimicrobial activity                       | [33] |
| Dipeptidase 2                                                  | Q9H4A9 | Carboxypeptidase activity                    | [80] |
| Dipeptidase 3                                                  | Q9H4B8 | Carboxypeptidase activity                    | [80] |
| Dipeptidyl peptidase 1                                         | P53634 | Carboxypeptidase activity                    | [81] |
| Dipeptidyl peptidase 2                                         | Q9UHL4 | Carboxypeptidase activity                    | [82] |
| Dipeptidyl peptidase 3                                         | Q9NY33 | Carboxypeptidase activity                    | [83] |
| Dipeptidyl peptidase 4                                         | P27487 | Carboxypeptidase activity                    | [84] |
| Dipeptidyl peptidase 9                                         | Q86TI2 | Carboxypeptidase activity                    | [85] |
| Disintegrin and metalloproteinase domain-containing protein 10 | O14672 | Metalloendopeptidase activity                | [86] |
| Disintegrin and metalloproteinase domain-containing protein 11 | O75078 | Metalloendopeptidase activity                | [86] |
| Disintegrin and metalloproteinase domain-containing protein 12 | O43184 | Metalloendopeptidase activity                | [86] |

---

|                                                                |        |                                                   |           |
|----------------------------------------------------------------|--------|---------------------------------------------------|-----------|
| Disintegrin and metalloproteinase domain-containing protein 15 | Q13444 | Metalloendopeptidase activity                     | [86]      |
| Disintegrin and metalloproteinase domain-containing protein 17 | P78536 | Metalloendopeptidase activity                     | [86]      |
| Disintegrin and metalloproteinase domain-containing protein 22 | Q9P0K1 | Metalloendopeptidase activity                     | [86]      |
| Disintegrin and metalloproteinase domain-containing protein 23 | O75077 | Metalloendopeptidase activity                     | [86]      |
| Disintegrin and metalloproteinase domain-containing protein 28 | Q9UKQ2 | Metalloendopeptidase activity                     | [86]      |
| Disintegrin and metalloproteinase domain-containing protein 9  | Q13443 | Metalloendopeptidase activity                     | [86]      |
| Drebrin-like protein                                           | Q9UJU6 | Immunomodulatory effect                           | [87]      |
| Elafin                                                         | P19957 | Protease inhibitor                                | [88]      |
| Endoplasmic reticulum aminopeptidase 1                         | Q9NZ08 | Aminopeptidase activity                           | [89]      |
| Endoplasmic reticulum aminopeptidase 2                         | Q6P179 | Aminopeptidase activity                           | [89]      |
| Eosinophil cationic protein                                    | P12724 | Antimicrobial activity                            | [90]      |
| Extracellular glycoprotein lacritin                            | Q9GZZ8 | Antimicrobial activity                            | [92]      |
| Fatty acid-binding protein 4                                   | P15090 | Immunomodulatory effect                           | [93]      |
| Fatty acid-binding protein 5                                   | Q01469 | Immunomodulatory effect                           | [94]      |
| Fibrinogen alpha chain                                         | P02671 | Immunomodulatory effect                           | [95]      |
| Fibrinogen beta chain                                          | P02675 | Immunomodulatory effect                           | [95]      |
| Fibrinogen gamma chain                                         | P02679 | Immunomodulatory effect                           | [95]      |
| Fibroleukin                                                    | Q14314 | Immunomodulatory effect                           | [97]      |
| Folliculin-interacting protein 1                               | Q8TF40 | Immunomodulatory effect                           | [98]      |
| Furin                                                          | P09958 | Serine protease activity                          | [99]      |
| Galectin-1                                                     | P09382 | Immunomodulatory effect                           | [101]     |
| Galectin-3                                                     | P17931 | Immunomodulatory effect                           | [103]     |
| Galectin-3-binding protein                                     | Q08380 | Antimicrobial activity<br>Immunomodulatory effect | [104,105] |
| Galectin-7                                                     | P47929 | Immunomodulatory effect                           | [106]     |
| Gelsolin                                                       | P06396 | Processed from has anti-microbial activity        | [109]     |
| Glia-derived nexin                                             | P07093 | Protease inhibitor                                | [110]     |
| Glucose-6-phosphate isomerase                                  | P06744 | Induces immunoglobulin secretion                  | [111]     |
| Glutamate carboxypeptidase 2                                   | Q04609 | Carboxypeptidase activity                         | [112]     |
| Glutamyl aminopeptidase                                        | Q07075 | Aminopeptidase activity                           | [113]     |
| Glutathione S-transferase omega-1                              | P78417 | Immunomodulatory effect                           | [114]     |
| Glutathione S-transferase P                                    | P09211 | Immunomodulatory effect                           | [115]     |
| Glyceraldehyde-3-phosphate dehydrogenase                       | P04406 | Immunomodulatory effect                           | [116]     |
| Growth-regulated alpha protein                                 | P09341 | Antimicrobial activity                            | [118]     |
| Guanylate-binding protein 1                                    | P32455 | Immunomodulatory effect                           | [119]     |

|                                |        |                                                                  |           |
|--------------------------------|--------|------------------------------------------------------------------|-----------|
| Haptoglobin                    | P00738 | Immunomodulatory effect<br>Iron sequestering                     | [122]     |
| Haptoglobin-related protein    | P00739 | Anti-parasitic effect                                            | [123]     |
| Heme-binding protein 1         | Q9NRV9 | Heme/iron sequestration                                          | [124]     |
| Heme-binding protein 2         | Q9Y5Z4 | Heme/iron sequestration                                          | [124]     |
| Hemoglobin subunit alpha       | P69905 | Processed forms (hemo-<br>cidins) have antimicrobial<br>activity | [125]     |
| Hemoglobin subunit beta        | P68871 | Processed forms (hemo-<br>cidins) have antimicrobial<br>activity | [125]     |
| Hemopexin                      | P02790 | Antibacterail effect<br>Anti-inflammatory effect                 | [126]     |
| Heparin cofactor 2             | P05546 | Protease inhibitor                                               | [127]     |
| Hepcidin                       | P81172 | Antimicrobial activity<br>Iron sequestration                     | [128,129] |
| High mobility group protein B1 | P09429 | Immunomodulatory effect                                          | [130]     |
| High mobility group protein B2 | P26583 | Antimicrobial activity                                           | [131]     |
| High mobility group protein B3 | O15347 | Immunomodulatory effect                                          | [132]     |
| Histidine-rich glycoprotein    | P04196 | Antimicrobial activity                                           | [133]     |
| Histone H1.0                   | P07305 | Antimicrobial activity                                           | [134]     |
| Histone H1.1                   | Q02539 | Antimicrobial activity                                           | [134]     |
| Histone H1.10                  | Q92522 | Antimicrobial activity                                           | [134]     |
| Histone H1.2                   | P16403 | Antimicrobial activity                                           | [134]     |
| Histone H1.3                   | P16402 | Antimicrobial activity                                           | [134]     |
| Histone H1.4                   | P10412 | Antimicrobial activity                                           | [134]     |
| Histone H1.5                   | P16401 | Antimicrobial activity                                           | [134]     |
| Histone H2A type 1             | P0C0S8 | Antimicrobial activity                                           | [134]     |
| Histone H2A type 1-B/E         | P04908 | Antimicrobial activity                                           | [134]     |
| Histone H2A type 1-C           | Q93077 | Antimicrobial activity                                           | [134]     |
| Histone H2A type 1-D           | P20671 | Antimicrobial activity                                           | [134]     |
| Histone H2A type 1-H           | Q96KK5 | Antimicrobial activity                                           | [134]     |
| Histone H2A type 1-J           | Q99878 | Antimicrobial activity                                           | [134]     |
| Histone H2A type 2-A           | Q6FI13 | Antimicrobial activity                                           | [134]     |
| Histone H2A type 2-B           | Q8IUE6 | Antimicrobial activity                                           | [134]     |
| Histone H2A type 2-C           | Q16777 | Antimicrobial activity                                           | [134]     |
| Histone H2A type 3             | Q7L7L0 | Antimicrobial activity                                           | [134]     |
| Histone H2A.J                  | Q9BTM1 | Antimicrobial activity                                           | [134]     |
| Histone H2A.V                  | Q71UI9 | Antimicrobial activity                                           | [134]     |
| Histone H2A.Z                  | P0C0S5 | Antimicrobial activity                                           | [134]     |
| Histone H2AX                   | P16104 | Antimicrobial activity                                           | [134]     |
| Histone H2B type 1-A           | Q96A08 | Antimicrobial activity                                           | [134]     |
| Histone H2B type 1-B           | P33778 | Antimicrobial activity                                           | [134]     |
| Histone H2B type 1-C/E/F/G/I   | P62807 | Antimicrobial activity                                           | [134]     |
| Histone H2B type 1-D           | P58876 | Antimicrobial activity                                           | [134]     |

|                                              |        |                                                    |           |
|----------------------------------------------|--------|----------------------------------------------------|-----------|
| Histone H2B type 1-H                         | Q93079 | Antimicrobial activity                             | [134]     |
| Histone H2B type 1-J                         | P06899 | Antimicrobial activity                             | [134]     |
| Histone H2B type 1-K                         | O60814 | Antimicrobial activity                             | [134]     |
| Histone H2B type 1-L                         | Q99880 | Antimicrobial activity                             | [134]     |
| Histone H2B type 1-M                         | Q99879 | Antimicrobial activity                             | [134]     |
| Histone H2B type 1-N                         | Q99877 | Antimicrobial activity                             | [134]     |
| Histone H2B type 1-O                         | P23527 | Antimicrobial activity                             | [134]     |
| Histone H2B type 2-E                         | Q16778 | Antimicrobial activity                             | [134]     |
| Histone H2B type 2-F                         | Q5QNW6 | Antimicrobial activity                             | [134]     |
| Histone H2B type 3-B                         | Q8N257 | Antimicrobial activity                             | [134]     |
| Histone H2B type F-S                         | P57053 | Antimicrobial activity                             | [134]     |
| Histone H3.1                                 | P68431 | Antimicrobial activity                             | [134]     |
| Histone H3.1t                                | Q16695 | Antimicrobial activity                             | [134]     |
| Histone H3.2                                 | Q71DI3 | Antimicrobial activity                             | [134]     |
| Histone H3.3                                 | P84243 | Antimicrobial activity                             | [134]     |
| Histone H4                                   | P62805 | Antimicrobial activity                             | [134]     |
| Inter-alpha-trypsin inhibitor heavy chain H1 | P19827 | Protease inhibitor                                 | [135]     |
| Inter-alpha-trypsin inhibitor heavy chain H2 | P19823 | Protease inhibitor                                 | [135]     |
| Inter-alpha-trypsin inhibitor heavy chain H3 | Q06033 | Protease inhibitor                                 | [135]     |
| Inter-alpha-trypsin inhibitor heavy chain H4 | Q14624 | Protease inhibitor                                 | [135]     |
| Inter-alpha-trypsin inhibitor heavy chain H5 | Q86UX2 | Protease inhibitor                                 | [135]     |
| Kallikrein-10                                | O43240 | Serine protease activity                           | [138]     |
| Kallikrein-11                                | Q9UBX7 | Serine protease activity                           | [138]     |
| Kallikrein-13                                | Q9UKR3 | Serine protease activity                           | [138]     |
| Kallikrein-3                                 | P07288 | Serine protease activity                           | [138]     |
| Kallikrein-6                                 | Q92876 | Serine protease activity                           | [138]     |
| Kallikrein-7                                 | P49862 | Processing the maturation of<br>LL-37 cathelicidin |           |
| Kallikrein-8                                 | O60259 | Serine protease activity                           | [138]     |
| Kininogen-1                                  | P01042 | Antimicrobial activity                             | [140,141] |
| Kunitz-type protease inhibitor 1             | O43278 | Protease inhibitor                                 | [142]     |
| Kunitz-type protease inhibitor 2             | O43291 | Protease inhibitor                                 | [142]     |
| Lactotransferrin                             | P02788 | Antimicrobial activity<br>Iron sequestration       | [33]      |
| Legumain                                     | Q99538 | Endopeptidase activity                             | [144]     |
| Leukocyte elastase inhibitor                 | P30740 | Protease inhibitor                                 | [145]     |
| Lipocalin-1                                  | P31025 | Immunomodulatory effect<br>Iron sequestration      | [146,147] |
| Lipocalin-2                                  | P80188 | Immunomodulatory effect<br>Iron sequestration      | [146,147] |
| Lipopolysaccharide-binding protein           | P18428 | Immunomodulatory effect                            | [148]     |
| Liver-expressed antimicrobial peptide 2      | Q969E1 | Antimicrobial activity                             | [149]     |
| Lymphotactin                                 | P47992 | Antimicrobial activity                             | [150]     |

---

|                                        |        |                                                                  |           |
|----------------------------------------|--------|------------------------------------------------------------------|-----------|
| Lysozyme C                             | P61626 | Antimicrobial activity                                           | [33]      |
| Macrophage migration inhibitory factor | P14174 | Antimicrobial activity                                           | [151]     |
| Mammaglobin-B                          | O75556 | Immunomodulatory effect                                          | [153]     |
| Matrix metalloproteinase-9             | P14780 | Metalloprotease activity                                         | [155]     |
| Melanotransferrin                      | P08582 | Iron sequestration                                               | [156]     |
| Metalloproteinase inhibitor 1          | P01033 | Protease Inhibitor                                               | [157]     |
| Metalloproteinase inhibitor 2          | P16035 | Protease Inhibitor                                               | [157]     |
| Metalloproteinase inhibitor 3          | P35625 | Protease Inhibitor                                               | [157]     |
| Metalloproteinase inhibitor 4          | Q99727 | Protease Inhibitor                                               | [157]     |
| Midkine                                | P21741 | Immunomodulatory effect                                          | [158]     |
| Moesin                                 | P26038 | Immunomodulatory effect                                          | [159]     |
| Mucin-16                               | Q8WXI7 | Antimicrobial activity                                           | [160]     |
| Mucin-3A                               | Q02505 | Antimicrobial activity                                           | [160]     |
| Myeloperoxidase                        | P05164 | Antimicrobial activity                                           | [162]     |
| Myoglobin                              | P02144 | Processed forms (hemo-<br>cidins) have antimicrobial<br>activity | [163]     |
| N-acetylmuramoyl-L-alanine amidase     | Q96PD5 | Antimicrobial activity                                           | [164]     |
| Neprilysin                             | P08473 | Endopeptidase activity                                           | [165]     |
| Neutrophil collagenase                 | P22894 | Endopeptidase activity<br>Immunomodulatory effect                | [166]     |
| Neutrophil defensin 1                  | P59665 | Antimicrobial activity                                           | [33]      |
| Neutrophil defensin 3                  | P59666 | Antimicrobial activity                                           | [33]      |
| Neutrophil elastase                    | P08246 | Serine protease activity                                         | [167]     |
| Nicotinamide phosphoribosyltransferase | P43490 | Immunomodulatory effect                                          | [168]     |
| Non-histone chromosomal protein HMG-17 | P05204 | Antimicrobial activity                                           | [169]     |
| Non-secretory ribonuclease             | P10153 | Ribonuclease activity                                            | [170]     |
| Peptidase inhibitor 16                 | Q6UXB8 | Protease inhibitor                                               | [172]     |
| Peptidoglycan recognition protein 1    | O75594 | Antimicrobial activity                                           | [173]     |
| Phospholipase B-like 1                 | Q6P4A8 | Suggested antimicrobial<br>activity                              | [175]     |
| Pigment epithelium-derived factor      | P36955 | Protease inhibitor                                               | [176]     |
| Plasma kallikrein                      | P03952 | Serine protease activity                                         | [138]     |
| Plasma serine protease inhibitor       | P05154 | Protease inhibitor                                               | [177]     |
| Plastin-2                              | P13796 | Immunomodulatory effect                                          | [178]     |
| Poly(rC)-binding protein 1             | Q15365 | Antiviral effect                                                 | [179]     |
| Poly(rC)-binding protein 2             | Q15366 | Antiviral effect                                                 | [180]     |
| Pregnancy zone protein                 | P20742 | Protease inhibitor                                               | [181]     |
| Pro-adrenomedullin                     | P35318 | Antimicrobial activity<br>Immunomodulatory effect                | [182,183] |
| Pro-cathepsin H                        | P09668 | Endopeptidase activity                                           | [60]      |
| Procathepsin L                         | P07711 | Endopeptidase activity                                           | [60]      |
| Progranulin                            | P28799 | Immunomodulatory effect                                          | [184]     |
| Prolactin-inducible protein            | P12273 | Aspartic-type endopepti-<br>dase activity                        | [185,186] |

---



|                                                   |        |                                                          |           |
|---------------------------------------------------|--------|----------------------------------------------------------|-----------|
|                                                   |        | Modulates the activity of<br>Zn- $\alpha$ 2 glycoprotein |           |
| Proline-rich protein 14                           | Q9BWN1 | Antimicrobial activity                                   | [187]     |
| Proline-rich protein 15                           | Q8IV56 | Antimicrobial activity                                   | [187]     |
| Proline-rich protein 20A                          | P86496 | Antimicrobial activity                                   | [187]     |
| Proline-rich protein 20B                          | P86481 | Antimicrobial activity                                   | [187]     |
| Proline-rich protein 20C                          | P86479 | Antimicrobial activity                                   | [187]     |
| Proline-rich protein 20D                          | P86480 | Antimicrobial activity                                   | [187]     |
| Proline-rich protein 20E                          | P86478 | Antimicrobial activity                                   | [187]     |
| Prolyl endopeptidase                              | P48147 | Endopeptidase activity                                   | [188]     |
| Pro-opiomelanocortin                              | P01189 | Antimicrobial activity                                   | [189]     |
| Prosaposin                                        | P07602 | Processed forms has antimi-<br>crobial effect            | [191]     |
| Prostasin                                         | Q16651 | Serine protease activity                                 | [192]     |
| Protachykinin-1                                   | P20366 | Antimicrobial activity                                   | [254]     |
| Protein AMBP                                      | P02760 | Protease inhibitor                                       | [193]     |
| Protein FAM3A                                     | P98173 | Antifungal effect                                        | [194]     |
| Protein S100-A1                                   | P23297 | Immunomodulatory effect                                  | [195]     |
| Protein S100-A10                                  | P60903 | Immunomodulatory effect                                  | [196]     |
| Protein S100-A11                                  | P31949 | Immunomodulatory effect                                  | [197]     |
| Protein S100-A12                                  | P80511 | Immunomodulatory effect                                  | [196]     |
| Protein S100-A13                                  | Q99584 | Immunomodulatory effect                                  | [198]     |
| Protein S100-A14                                  | Q9HCY8 | Immunomodulatory effect                                  | [199]     |
| Protein S100-A4                                   | P26447 | Immunomodulatory effect                                  | [196]     |
| Protein S100-A6                                   | P06703 | Immunomodulatory effect                                  | [201]     |
| Protein S100-A7                                   | P31151 | Immunomodulatory effect                                  | [196]     |
| Protein S100-A8                                   | P05109 | Immunomodulatory effect                                  | [196]     |
| Protein S100-A9                                   | P06702 | Immunomodulatory effect                                  | [196]     |
| Protein S100-B                                    | P04271 | Immunomodulatory effect                                  | [196]     |
| Protein S100-P                                    | P25815 | Immunomodulatory effect                                  | [196]     |
| Puromycin-sensitive aminopeptidase                | P55786 | Aminopeptidase activity                                  | [203]     |
| Retroviral-like aspartic protease 1               | Q53RT3 | Aspartic-type endopepti-<br>dase activity                | [205]     |
| Ribonuclease 4                                    | P34096 | Ribonuclease activity                                    | [170]     |
| Ribonuclease 7                                    | Q9H1E1 | Ribonuclease activity                                    | [170]     |
| Ribonuclease K6                                   | Q93091 | Ribonuclease activity                                    | [170]     |
| Ribonuclease pancreatic                           | P07998 | Ribonuclease activity                                    | [170]     |
| Ribonuclease T2                                   | O00584 | Ribonuclease activity                                    | [170]     |
| Secreted Ly-6/uPAR domain-containing<br>protein 2 | P0DP57 | Immunomodulatory effect                                  | [247]     |
| Secreted Ly-6/uPAR-related protein 1              | P55000 | Immunomodulatory effect                                  | [206]     |
| Semenogelin-1                                     | P04279 | Processed forms has antimi-<br>crobial activity          | [209–211] |
| Serine protease 1                                 | P07477 | Serine protease activity                                 | [212]     |
| Serine protease 23                                | O95084 | Serine protease activity                                 | [212]     |

---

|                                          |        |                          |           |
|------------------------------------------|--------|--------------------------|-----------|
| Serine protease 27                       | Q9BQR3 | Serine protease activity | [212]     |
| Serine protease HTRA1                    | Q92743 | Serine protease activity | [212]     |
| Serine protease HTRA2                    | O43464 | Serine protease activity | [212]     |
| Serine protease HTRA3                    | P83110 | Serine protease activity | [212]     |
| Serine protease inhibitor Kazal-type 1   | P00995 | Protease inhibitor       | [213]     |
| Serine protease inhibitor Kazal-type 2   | P20155 | Protease inhibitor       | [213]     |
| Serine protease inhibitor Kazal-type 5   | Q9NQ38 | Protease inhibitor       | [213]     |
| Serine protease inhibitor Kazal-type 6   | Q6UWN8 | Protease inhibitor       | [213]     |
| Serine protease inhibitor Kazal-type 7   | P58062 | Protease inhibitor       | [213]     |
| Serotransferrin                          | P02787 | Iron sequestration       | [214]     |
| Serpin B10                               | P48595 | Protease inhibitor       | [215]     |
| Serpin B11                               | Q96P15 | Protease inhibitor       | [215]     |
| Serpin B3                                | P29508 | Protease inhibitor       | [215]     |
| Serpin B4                                | P48594 | Protease inhibitor       | [215]     |
| Serpin B6                                | P35237 | Protease inhibitor       | [215]     |
| Serpin B8                                | P50452 | Protease inhibitor       | [215]     |
| Serpin B9                                | P50453 | Protease inhibitor       | [215]     |
| Serum amyloid A-1 protein                | P0DJI8 | Immunomodulatory effect  | [216]     |
| Serum amyloid A-2 protein                | P0DJI9 | Immunomodulatory effect  | [216]     |
| Serum amyloid A-4 protein                | P35542 | Immunomodulatory effect  | [216]     |
| Serum amyloid P-component                | P02743 | Antiviral effect         | [217]     |
| Small proline-rich protein 3             | Q9UBC9 | Antimicrobial activity   | [187]     |
| Sperm-associated antigen 11B             | Q08648 | Antimicrobial activity   | [255]     |
| Syntenin-1                               | O00560 | Immunomodulatory effect  | [219]     |
| T-cell immunomodulatory protein          | Q8TB96 | Immunomodulatory effect  | [220]     |
| Thioredoxin domain-containing protein 17 | Q9BRA2 | Immunomodulatory effect  | [221]     |
| Thymosin beta-10                         | P63313 | Antimicrobial activity   | [222]     |
| Thymosin beta-4                          | P62328 | Antimicrobial activity   | [222]     |
| Thyroxine-binding globulin               | P05543 | Protease inhibitor       | [223]     |
| Toll-interacting protein                 | Q9H0E2 | Immunomodulatory effect  | [224]     |
| Transgelin                               | Q01995 | Immunomodulatory effect  | [225]     |
| Transgelin-2                             | P37802 | Immunomodulatory effect  | [226]     |
| Triokinase/FMN cyclase                   | Q3LXA3 | Immunomodulatory effect  | [230]     |
| Tripeptidyl-peptidase 1                  | O14773 | Serine protease activity | [231]     |
| Trypsin-2                                | P07478 | Serine protease activity | [233]     |
| Trypsin-3                                | P35030 | Serine protease activity | [234]     |
| Tryptase alpha/beta-1                    | Q15661 | Serine protease activity | [234]     |
| Tryptase beta-2                          | P20231 | Serine protease activity | [234]     |
| Uromodulin                               | P07911 | Antimicrobial activity   | [236,237] |
| Uteroglobin                              | P11684 | Immunomodulatory effect  | [238]     |
| Vitamin D-binding protein                | P02774 | Immunomodulatory effect  | [239]     |
| WAP four-disulfide core domain protein 1 | Q9HC57 | Protease inhibitor       | [240]     |
| WAP four-disulfide core domain protein 2 | Q14508 | Protease inhibitor       | [240]     |

---

|                                                                        |        |                           |       |
|------------------------------------------------------------------------|--------|---------------------------|-------|
| WAP, Kazal, immunoglobulin, Kunitz and NTR domain-containing protein 2 | Q8TEU8 | Protease inhibitor        | [240] |
| Xaa-Pro aminopeptidase 1                                               | Q9NQW7 | Aminopeptidase activity   | [241] |
| Xaa-Pro dipeptidase                                                    | P12955 | Carboxypeptidase activity | [242] |
| Zinc-alpha-2-glycoprotein                                              | P25311 | Immunomodulatory effect   | [243] |
| Zymogen granule membrane protein 16                                    | O60844 | Antimicrobial activity    | [244] |
| Zymogen granule protein 16 homolog B                                   | Q96DA0 | Antimicrobial activity    | [245] |

## References

- Moreno, R.D.; Laserre, A.A.; Barros, C. Protease activity involvement in the passage of mammalian sperm through the zona pellucida. *Biol. Res.* **2011**, *44*, 145–150, doi:10.4067/S0716-97602011000200006.
- Kumagai, T.; Fan, S.; Smith, A.M. <p>ADAMDEC1 and Its Role in Inflammatory Disease and Cancer</p>. *Met. Med.* **2020**, *7*, 15–28, doi:10.2147/MNM.S263813.
- Cecilian, F.; Lecchi, C. The Immune Functions of  $\alpha$  1 Acid Glycoprotein. *Curr. Protein Pept. Sci.* **2019**, *20*, 505–524, doi:10.2174/1389203720666190405101138.
- Dimberg, J.; Ström, K.; Löfgren, S.; Zar, N.; Hugander, A.; Matussek, A. Expression of the serine protease inhibitor serpinA3 in human colorectal adenocarcinomas. *Oncol. Lett.* **2011**, *2*, 413, doi:10.3892/OL.2011.280.
- Janciauskiene, S.; Wrenger, S.; Immenschuh, S.; Olejnicka, B.; Greulich, T.; Welte, T.; Chorostowska-Wynimko, J. The multifaceted effects of Alpha1-Antitrypsin on neutrophil functions. *Front. Pharmacol.* **2018**, *9*, 341, doi:10.3389/FPHAR.2018.00341/BIBTEX.
- Cederfur, C.; Salomonsson, E.; Nilsson, J.; Halim, A.; Öberg, C.T.; Larson, G.; Nilsson, U.J.; Leffler, H. Different affinity of galectins for human serum glycoproteins: galectin-3 binds many protease inhibitors and acute phase proteins. *Glycobiology* **2008**, *18*, 384–394, doi:10.1093/GLYCOB/CWN015.
- Singh, S.; Saleem, S.; Reed, G.L. Alpha2-Antiplasmin: The Devil You Don't Know in Cerebrovascular and Cardiovascular Disease. *Front. Cardiovasc. Med.* **2020**, *7*, 363, doi:10.3389/FCVM.2020.608899/BIBTEX.
- Wang, H.; E. Sama, A. Anti-inflammatory role of fetuin-A in injury and infection. *Curr. Mol. Med.* **2012**, *12*, 625–633, doi:10.2174/156652412800620039.
- Vandooren, J.; Itoh, Y. Alpha-2-Macroglobulin in Inflammation, Immunity and Infections. *Front. Immunol.* **2021**, *12*, 5411, doi:10.3389/FIMMU.2021.803244/BIBTEX.
- Harwood, S.L.; Nielsen, N.S.; Jensen, K.T.; Nielsen, P.K.; Thøgersen, I.B.; Enghild, J.J.  $\alpha$  2-Macroglobulin-like protein 1 can conjugate and inhibit proteases through their hydroxyl groups, because of an enhanced reactivity of its thiol ester. *J. Biol. Chem.* **2020**, *295*, 16732–16742, doi:10.1074/JBC.RA120.015694.
- Lahiri, D.; Nag, M.; Banerjee, R.; Mukherjee, D.; Garai, S.; Sarkar, T.; Dey, A.; Sheikh, H.I.; Pathak, S.K.; Edinur, H.A.; et al. Amylases: Biofilm Inducer or Biofilm Inhibitor? *Front. Cell. Infect. Microbiol.* **2021**, *11*, 355, doi:10.3389/FCIMB.2021.660048/BIBTEX.
- Cadel, S.; Piesse, C.; Pham, V.L.; Pernier, J.; Hanquez, C.; Gouzy-Darmon, C.A.; Foulon, T. Aminopeptidase B. *Handb. Proteolytic Enzym.* **2013**, *1*, 473–479, doi:10.1016/B978-0-12-382219-2.00097-1.
- Turner, A.J. Aminopeptidase N. *Handb. Proteolytic Enzym.* **2013**, *1*, 397, doi:10.1016/B978-0-12-382219-2.00079-X.
- Díaz-Perales, A.; Quesada, V.; Sánchez, L.M.; Ugalde, A.P.; Suárez, M.F.; Fueyo, A.; López-Otín, C. Identification of Human Aminopeptidase O, a Novel Metalloprotease with Structural Similarity to Aminopeptidase B and Leukotriene A4 Hydrolase \*. *J. Biol. Chem.* **2005**, *280*, 14310–14317, doi:10.1074/JBC.M41322200.
- Soscia, S.J.; Kirby, J.E.; Washicosky, K.J.; Tucker, S.M.; Ingelsson, M.; Hyman, B.; Burton, M.A.; Goldstein, L.E.; Duong, S.; Tanzi, R.E.; et al. The Alzheimer's Disease-Associated Amyloid  $\beta$ -Protein Is an Antimicrobial Peptide. *PLoS One* **2010**, *5*,

16. Hooper, L. V.; Stappenbeck, T.S.; Hong, C. V.; Gordon, J.I. Angiogenins: a new class of microbicidal proteins involved in innate immunity. *Nat. Immunol.* 2003 43 **2003**, 4, 269–273, doi:10.1038/ni888.
17. Mulligan, M.S.; Lentsch, A.B.; Huber-Lang, M.; Guo, R.F.; Sarma, V.; Wright, C.D.; Ulich, T.R.; Ward, P.A. Anti-inflammatory effects of mutant forms of secretory leukocyte protease inhibitor. *Am. J. Pathol.* **2000**, 156, 1033–1039, doi:10.1016/S0002-9440(10)64971-1.
18. Vandooren, J.; Goeminne, P.; Boon, L.; Ugarte-Berzal, E.; Rybakin, V.; Proost, P.; Abu El-Asrar, A.M.; Opdenakker, G. Neutrophils and activated macrophages control mucosal immunity by proteolytic cleavage of antileukoprotease. *Front. Immunol.* **2018**, 9, 28, doi:10.3389/FIMMU.2018.01154/FULL.
19. Roemisch, J.; Gray, E.; Hoffmann, J.N.; Wiedermann, C.J.; Kalina, U. Antithrombin: a new look at the actions of a serine protease inhibitor. *Blood Coagul. Fibrinolysis* **2002**, 13, 657–670, doi:10.1097/00001721-200212000-00001.
20. Tada, N.; Sakamoto, T.; Kagami, A.; Mochizuki, K.; Kurosaka, K. Antimicrobial activity of lipoprotein particles containing apolipoprotein A1. *Mol. Cell. Biochem.* **1993**, 119, 171–178, doi:10.1007/BF00926868.
21. Thompson, P.A.; Berbée, J.F.P.; Rensen, P.C.N.; Kitchens, R.L. Apolipoprotein A-II augments monocyte responses to LPS by suppressing the inhibitory activity of LPS-binding protein. *Innate Immun.* **2008**, 14, 365–374, doi:10.1177/1753425908099171.
22. Recalde, D.; Ostos, M.A.; Badell, E.; Garcia-Otin, A.L.; Pidoux, J.; Castro, G.; Zakin, M.M.; Scott-Algara, D. Human apolipoprotein A-IV reduces secretion of proinflammatory cytokines and atherosclerotic effects of a chronic infection mimicked by lipopolysaccharide. *Arterioscler. Thromb. Vasc. Biol.* **2004**, 24, 756–761, doi:10.1161/01.ATV.0000119353.03690.22.
23. Gaglione, R.; Cesaro, A.; Dell’Olmo, E.; Della Ventura, B.; Casillo, A.; Di Girolamo, R.; Velotta, R.; Notomista, E.; Veldhuizen, E.J.A.; Corsaro, M.M.; et al. Effects of human antimicrobial cryptides identified in apolipoprotein B depend on specific features of bacterial strains. *Sci. Reports* 2019 91 **2019**, 9, 1–13, doi:10.1038/s41598-019-43063-3.
24. Zewinger, S.; Reiser, J.; Jankowski, V.; Alansary, D.; Hahm, E.; Triem, S.; Klug, M.; Schunk, S.J.; Schmit, D.; Kramann, R.; et al. Apolipoprotein C3 induces inflammation and organ damage by alternative inflammasome activation. *Nat. Immunol.* 2019 211 **2019**, 21, 30–41, doi:10.1038/s41590-019-0548-1.
25. Mak, P.A.; Laffitte, B.A.; Desrumaux, C.; Joseph, S.B.; Curtiss, L.K.; Mangelsdorf, D.J.; Tontonoz, P.; Edwards, P.A. Regulated expression of the apolipoprotein E/C-I/C-IV/C-II gene cluster in murine and human macrophages. A critical role for nuclear liver X receptors alpha and beta. *J. Biol. Chem.* **2002**, 277, 31900–31908, doi:10.1074/JBC.M202993200.
26. Crespo-Sanjuán, J.; Zamora-Gonzalez, N.; DoloresCalvo-Nieves, M.; Andres-Ledesma, C. Apolipoprotein D. *Adv. Lipoprotein Res.* **2017**, doi:10.5772/66626.
27. Zhang, H.; Wu, L.M.; Wu, J. Cross-talk between apolipoprotein E and cytokines. *Mediators Inflamm.* **2011**, 2011, doi:10.1155/2011/949072.
28. Fang, J.; Yao, X.; Hou, M.; Duan, M.; Xing, L.; Huang, J.; Wang, Y.; Zhu, B.; Chen, Q.; Wang, H. ApoL1 induces kidney inflammation through RIG-I/NF-κB activation. *Biochem. Biophys. Res. Commun.* **2020**, 527, 466–473, doi:10.1016/J.BBRC.2020.04.054.
29. Wang, M.; Luo, G.H.; Liu, H.; Zhang, Y.P.; Wang, B.; Di, D.M.; Zhan, X.H.; Yu, Y.; Yao, S.; Zhang, X.Y.; et al. Apolipoprotein M induces inhibition of inflammatory responses via the S1PR1 and DHCR24 pathways. *Mol. Med. Rep.* **2019**, 19, 1272–1283, doi:10.3892/MMR.2018.9747.
30. Oberlies, J.; Watzl, C.; Giese, T.; Luckner, C.; Kropf, P.; Müller, I.; Ho, A.D.; Munder, M. Regulation of NK Cell Function by Human Granulocyte Arginase. *J. Immunol.* **2009**, 182, 5259–5267, doi:10.4049/JIMMUNOL.0803523.
31. Munder, M.; Mollinedo, F.; Calafat, J.; Canchado, J.; Gil-Lamaignere, C.; Fuentes, J.M.; Luckner, C.; Doschko, G.; Soler, G.; Eichmann, K.; et al. Arginase I is constitutively expressed in human granulocytes and participates in fungicidal activity. *Blood* **2005**, 105, 2549–2556, doi:10.1182/BLOOD-2004-07-2521.
32. Chaikuad, A.; Pilka, E.S.; De Riso, A.; Von Delft, F.; Kavanagh, K.L.; Vénien-Bryan, C.; Oppermann, U.; Yue, W.W. Structure of human aspartyl aminopeptidase complexed with substrate analogue: insight into catalytic mechanism,

- 
- substrate specificity and M18 peptidase family. *BMC Struct. Biol.* **2012**, *12*, 14, doi:10.1186/1472-6807-12-14.
33. Wiesner, J.; Vilcinskas, A. Antimicrobial peptides: the ancient arm of the human immune system. *Virulence* **2010**, *1*, 440–464, doi:10.4161/viru.1.5.12983.
34. Canny, G.; Levy, O. Bactericidal/permeability-increasing protein (BPI) and BPI homologs at mucosal sites. *Trends Immunol.* **2008**, *29*, 541–547, doi:10.1016/J.IT.2008.07.012.
35. Serrano, M.; Morán, L.; Martínez-Flores, J.A.; Mancebo, E.; Pleguezuelo, D.; Cabrera-Marante, O.; Delgado, J.; Serrano, A. Immune Complexes of Beta-2-Glycoprotein I and IgA Antiphospholipid Antibodies Identify Patients With Elevated Risk of Thrombosis and Early Mortality After Heart Transplantation. *Front. Immunol.* **2019**, *10*, 2891, doi:10.3389/FIMMU.2019.02891/BIBTEX.
36. Xie, J.; Yi, Q.; Uchanska-Ziegler, B.; Ziegler, A.  $\beta$ 2-microglobulin as a potential initiator of inflammatory responses. *Trends Immunol.* **2003**, *24*, 228–229, doi:10.1016/S1471-4906(03)00076-0.
37. Chiou, S.J.; Ko, H.J.; Hwang, C.C.; Hong, Y.R. The Double-Edged Sword of Beta2-Microglobulin in Antibacterial Properties and Amyloid Fibril-Mediated Cytotoxicity. *Int. J. Mol. Sci.* **2021**, *22*, Page 6330 **2021**, *22*, 6330, doi:10.3390/IJMS22126330.
38. Veiga-da-Cunha, M.; Chevalier, N.; Stroobant, V.; Vertommen, D.; Van Schaftingen, E. Metabolite Proofreading in Carnosine and Homocarnosine Synthesis: MOLECULAR IDENTIFICATION OF PM20D2 AS  $\beta$ -ALANYL-LYSINE DIPEPTIDASE\*. *J. Biol. Chem.* **2014**, *289*, 19726, doi:10.1074/JBC.M114.576579.
39. Koo, I.C.; Ohol, Y.M.; Wu, P.; Morisaki, J.H.; Cox, J.S.; Brown, E.J. Role for lysosomal enzyme  $\beta$ -hexosaminidase in the control of mycobacteria infection. *Proc. Natl. Acad. Sci. U. S. A.* **2008**, *105*, 710, doi:10.1073/PNAS.0708110105.
40. Jouvenet, N.; Neil, S.J.D.; Zhadina, M.; Zang, T.; Kratovac, Z.; Lee, Y.; McNatt, M.; Hatzioannou, T.; Bieniasz, P.D. Broad-Spectrum Inhibition of Retroviral and Filoviral Particle Release by Tetherin. *J. Virol.* **2009**, *83*, 1837–1844, doi:10.1128/JVI.02211-08/ASSET/0B2B503A-4881-4944-AD19-C39D684B829A/ASSETS/GRAPHIC/ZJV0040915210006.JPEG.
41. Liu, Y.; Bartlett, J.A.; Di, M.E.; Bomberger, J.M.; Chan, Y.R.; Gakhar, L.; Mallampalli, R.K.; McCray, P.B.; Di, Y.P. SPLUNC1/BPIFA1 Contributes to Pulmonary Host Defense against *Klebsiella pneumoniae* Respiratory Infection. *Am. J. Pathol.* **2013**, *182*, 1519–1531, doi:10.1016/J.AJP.2013.01.050.
42. Prokopovic, V.; Popovic, M.; Andjelkovic, U.; Marsavelski, A.; Raskovic, B.; Gavrovic-Jankulovic, M.; Polovic, N. Isolation, biochemical characterization and anti-bacterial activity of BPIFA2 protein. *Arch. Oral Biol.* **2014**, *59*, 302–309, doi:10.1016/J.ARCHORALBIO.2013.12.005.
43. Ebersole, J.L.; Kirakodu, S.; Nguyen, L.; Gonzalez, O.A. Gingival Transcriptome of Innate Antimicrobial Factors and the Oral Microbiome With Aging and Periodontitis. *Front. oral Heal.* **2022**, *3*, doi:10.3389/FROH.2022.817249.
44. Huang, Y.; Wang, M.; Hong, Y.; Bu, X.; Luan, G.; Wang, Y.; Li, Y.; Lou, H.; Wang, C.; Zhang, L. Reduced Expression of Antimicrobial Protein Secretory Leukoprotease Inhibitor and Clusterin in Chronic Rhinosinusitis with Nasal Polyps. *J. Immunol. Res.* **2021**, *2021*, doi:10.1155/2021/1057186.
45. Delorme-Axford, E.; Morosky, S.; Bomberger, J.; Stolz, D.B.; Jackson, W.T.; Coyne, C.B. BPIFB3 Regulates Autophagy and Cocksackievirus B Replication through a Noncanonical Pathway Independent of the Core Initiation Machinery. *MBio* **2014**, *5*, doi:10.1128/MBIO.02147-14/SUPPL\_FILE/MBO006142080SF7.TIF.
46. Ciaglia, E.; Montella, F.; Lopardo, V.; Scala, P.; Ferrario, A.; Cattaneo, M.; Carrizzo, A.; Malovini, A.; Madeddu, P.; Vecchione, C.; et al. Circulating BPIFB4 Levels Associate With and Influence the Abundance of Reparative Monocytes and Macrophages in Long Living Individuals. *Front. Immunol.* **2020**, *11*, 1034, doi:10.3389/FIMMU.2020.01034/BIBTEX.
47. Wong, G.W.; Yasuda, S.; Madhusudhan, M.S.; Li, L.; Yang, Y.; Krilis, S.A.; Šali, A.; Stevens, R.L. Human tryptase epsilon (PRSS22), a new member of the chromosome 16p13.3 family of human serine proteases expressed in airway epithelial cells. *J. Biol. Chem.* **2001**, *276*, 49169–49182, doi:10.1074/JBC.M108677200.
48. El Karim, I.A.; Linden, G.J.; Orr, D.F.; Lundy, F.T. Antimicrobial activity of neuropeptides against a range of micro-organisms from skin, oral, respiratory and gastrointestinal tract sites. *J. Neuroimmunol.* **2008**, *200*, 11–16, doi:10.1016/J.JNEUROIM.2008.05.014.

- 
49. Ji, J.; Su, L.; Liu, Z. Critical role of calpain in inflammation. *Biomed. Reports* **2016**, *5*, 647–652, doi:10.3892/BR.2016.785/HTML.
  50. Luo, Y.; Sellitti, D.F.; Suzuki, K. The Calpain Proteolytic System. *Encycl. Cell Biol.* **2016**, *1*, 670–680, doi:10.1016/B978-0-12-394447-4.10075-6.
  51. Morrison, H. Carboxypeptidase A. *Enzym. Act. Sites their React. Mech.* **2021**, 37–40, doi:10.1016/B978-0-12-821067-3.00008-8.
  52. Avilés, F.X.; Vendrell, J. Carboxypeptidase B. *Handb. Proteolytic Enzym.* **2013**, *1*, 1324–1329, doi:10.1016/B978-0-12-382219-2.00297-0.
  53. Fricker, L.D. Carboxypeptidases E and D. *Handb. Biol. Act. Pept.* **2013**, 1715–1720, doi:10.1016/B978-0-12-385095-9.00235-9.
  54. Skidgel, R.A. Carboxypeptidase M. *Handb. Proteolytic Enzym. Second Ed.* **2004**, *1*, 851–854, doi:10.1016/B978-0-12-079611-3.50260-3.
  55. Matthews, K.W.; Mueller-Ortiz, S.L.; Wetsel, R.A. Carboxypeptidase N: a pleiotropic regulator of inflammation. *Mol. Immunol.* **2004**, *40*, 785–793, doi:10.1016/J.MOLIMM.2003.10.002.
  56. Lee, J.-H.; Cho, H.-S.; Lee, J.-J.; Jun, S.Y.; Ahn, J.-H.; Min, J.-S.; Yoon, J.-Y.; Choi, M.-H.; Jeon, S.-J.; Lim, J.H.; et al. Plasma glutamate carboxypeptidase is a negative regulator in liver cancer metastasis. *Oncotarget* **2016**, *7*, 79774–79786, doi:10.18632/ONCOTARGET.12967.
  57. Hosomi, S.; Chen, Z.; Baker, K.; Chen, L.; Huang, Y.H.; Olszak, T.; Zeissig, S.; Wang, J.H.; Mandelboim, O.; Beauchemin, N.; et al. CEACAM1 on activated NK cells inhibits NKG2D-mediated cytolytic function and signaling. *Eur. J. Immunol.* **2013**, *43*, 2473–2483, doi:10.1002/EJI.201242676.
  58. Pils, S.; Gerrard, D.T.; Meyer, A.; Hauck, C.R. CEACAM3: An innate immune receptor directed against human-restricted bacterial pathogens. *Int. J. Med. Microbiol.* **2008**, *298*, 553–560, doi:10.1016/J.IJMM.2008.04.005.
  59. Kono, Y. Apparent antibacterial activity of catalase: role of lipid hydroperoxide contamination. *J. Biochem.* **1995**, *117*, 42–46, doi:10.1093/OXFORDJOURNALS.JBCHEM.A124718.
  60. Patel, S.; Homaei, A.; El-Seedi, H.R.; Akhtar, N. Cathepsins: Proteases that are vital for survival but can also be fatal. *Biomed. Pharmacother.* **2018**, *105*, 526, doi:10.1016/J.BIOPHA.2018.05.148.
  61. Colomb, F.; Wang, W.; Simpson, D.; Zafar, M.; Beynon, R.; Rhodes, J.M.; Yu, L.G. Galectin-3 interacts with the cell-surface glycoprotein CD146 (MCAM, MUC18) and induces secretion of metastasis-promoting cytokines from vascular endothelial cells. *J. Biol. Chem.* **2017**, *292*, 8381–8389, doi:10.1074/JBC.M117.783431.
  62. Linder, M.C. Ceruloplasmin and other copper binding components of blood plasma and their functions: an update. *Metallomics* **2016**, *8*, 887–905, doi:10.1039/C6MT00103C.
  63. Dela Cruz, C.S.; Liu, W.; He, C.H.; Jacoby, A.; Gornitzky, A.; Ma, B.; Flavell, R.; Lee, C.G.; Elias, J.A. Chitinase 3-like-1 promotes *Streptococcus pneumoniae* killing and augments host tolerance to lung antibacterial responses. *Cell Host Microbe* **2012**, *12*, 34–46, doi:10.1016/J.CHOM.2012.05.017.
  64. Hall, A.J.; Quinnell, R.J.; Raiko, A.; Lagog, M.; Siba, P.; Morroll, S.; Falcone, F.H. Chitotriosidase deficiency is not associated with human hookworm infection in a Papua New Guinean population. *Infect. Genet. Evol.* **2007**, *7*, 743–747, doi:10.1016/J.MEEGID.2007.07.010.
  65. Briolat, J.; Wu, S.D.; Mahata, S.K.; Gonthier, B.; Bagnard, D.; Chasserot-Golaz, S.; Helle, K.B.; Aunis, D.; Metz-Boutigue, M.H. New antimicrobial activity for the catecholamine release-inhibitory peptide from chromogranin A. *Cell. Mol. Life Sci.* **2005**, *62*, 377–385, doi:10.1007/S00018-004-4461-9.
  66. Jeong, S.; Ledee, D.R.; Gordon, G.M.; Itakura, T.; Patel, N.; Martin, A.; Fini, M.E. Interaction of clusterin and matrix metalloproteinase-9 and its implication for epithelial homeostasis and inflammation. *Am. J. Pathol.* **2012**, *180*, 2028–39, doi:10.1016/j.ajpath.2012.01.025.
  67. Verdijk, P.; van Veelen, P.A.; de Ru, A.H.; Hensbergen, P.J.; Mizuno, K.; Koerten, H.K.; Koning, F.; Tensen, C.P.; Mommaas, A.M. Morphological changes during dendritic cell maturation correlate with cofilin activation and translocation to the cell membrane. *Eur. J. Immunol.* **2004**, *34*, 156–164, doi:10.1002/EJI.200324241.
  68. Hoeksema, M.; Van Eijk, M.; Haagsman, H.P.; Hartshorn, K.L. Histones as mediators of host defense, inflammation and

- thrombosis. <http://dx.doi.org/10.2217/fmb.15.151> **2016**, *11*, 441–453, doi:10.2217/FMB.15.151.
69. Hill, L.A.; Vassiliadi, D.A.; Dimopoulou, I.; Anderson, A.J.; Boyle, L.D.; Kilgour, A.H.M.; Stimson, R.H.; Machado, Y.; Overall, C.M.; Walker, B.R.; et al. Neutrophil elastase-cleaved corticosteroid-binding globulin is absent in human plasma. *J. Endocrinol.* **2019**, *240*, 27–39, doi:10.1530/JOE-18-0479.
70. Sproston, N.R.; Ashworth, J.J. Role of C-reactive protein at sites of inflammation and infection. *Front. Immunol.* **2018**, *9*, 754, doi:10.3389/FIMMU.2018.00754/BIBTEX.
71. Zavasnik-Bergant, T. Cystatin protease inhibitors and immune functions. *Front. Biosci.* **2008**, *13*, 4625–4637, doi:10.2741/3028.
72. Matsushima, M.; Takahashi, T.; Ichinose, M.; Miki, K.; Kurokawa, K.; Takahashi, K. Structural and immunological evidence for the identity of prolyl aminopeptidase with leucyl aminopeptidase. *Biochem. Biophys. Res. Commun.* **1991**, *178*, 1459–1464, doi:10.1016/0006-291X(91)91057-J.
73. Berezniuk, I.; Vu, H.T.; Lyons, P.J.; Sironi, J.J.; Xiao, H.; Burd, B.; Setou, M.; Angeletti, R.H.; Ikegami, K.; Fricker, L.D. Cytosolic carboxypeptidase 1 is involved in processing  $\alpha$ - and  $\beta$ -tubulin. *J. Biol. Chem.* **2012**, *287*, 6503–6517, doi:10.1074/JBC.M111.309138.
74. Tort, O.; Tanco, S.; Rocha, C.; Bièche, I.; Seixas, C.; Bosc, C.; Andrieux, A.; Moutin, M.J.; Avilés, F.X.; Lorenzo, J.; et al. The cytosolic carboxypeptidases CCP2 and CCP3 catalyze posttranslational removal of acidic amino acids. *Mol. Biol. Cell* **2014**, *25*, 3017, doi:10.1091/MBC.E14-06-1072.
75. Bauer, K. Cytosol nonspecific dipeptidase. *Handb. Proteolytic Enzym. Second Ed.* **2004**, *1*, 1020–1022, doi:10.1016/B978-0-12-079611-3.50324-4.
76. Li, J.; Metruccio, M.M.E.; Evans, D.J.; Fleiszig, S.M.J. Mucosal fluid glycoprotein DMBT1 suppresses twitching motility and virulence of the opportunistic pathogen *Pseudomonas aeruginosa*. *PLoS Pathog.* **2017**, *13*, doi:10.1371/JOURNAL.PPAT.1006392.
77. Rosenstiel, P.; Sina, C.; End, C.; Renner, M.; Lyer, S.; Till, A.; Hellmig, S.; Nikolaus, S.; Fölsch, U.R.; Helmke, B.; et al. Regulation of DMBT1 via NOD2 and TLR4 in intestinal epithelial cells modulates bacterial recognition and invasion. *J. Immunol.* **2007**, *178*, 8203–8211, doi:10.4049/JIMMUNOL.178.12.8203.
78. Jiménez-Alcázar, M.; Rangaswamy, C.; Panda, R.; Bitterling, J.; Simsek, Y.J.; Long, A.T.; Bilyy, R.; Krenn, V.; Renné, C.; Renné, T.; et al. Host DNases prevent vascular occlusion by neutrophil extracellular traps. *Science* **2017**, *358*, 1202–1206, doi:10.1126/SCIENCE.AAM8897.
79. Liao, R.Z.; Himo, F.; Yu, J.G.; Liu, R.Z. Dipeptide hydrolysis by the dinuclear zinc enzyme human renal dipeptidase: mechanistic insights from DFT calculations. *J. Inorg. Biochem.* **2010**, *104*, 37–46, doi:10.1016/J.JINORGBIO.2009.09.025.
80. Habib, G.M.; Shi, Z.Z.; Cuevas, A.A.; Lieberman, M.W. Identification of two additional members of the membrane-bound dipeptidase family. *FASEB J.* **2003**, *17*, 1313–1315, doi:10.1096/FJ.02-0899FJE.
81. Turk, B.; Turk, D.; Dolenc, I.; Turk, V. Dipeptidyl-Peptidase I. *Handb. Proteolytic Enzym.* **2013**, *2*, 1968–1974, doi:10.1016/B978-0-12-382219-2.00447-6.
82. De Meester, I. Dipeptidyl-Peptidase II. *Handb. Proteolytic Enzym.* **2013**, *3*, 3432–3438, doi:10.1016/B978-0-12-382219-2.00759-6.
83. Prajapati, S.C.; Chauhan, S.S. Dipeptidyl peptidase III: a multifaceted oligopeptide N-end cutter. *FEBS J.* **2011**, *278*, 3256–3276, doi:10.1111/J.1742-4658.2011.08275.X.
84. Misumi, Y.; Ikehara, Y. Dipeptidyl-peptidase IV. *Handb. Proteolytic Enzym.* **2013**, *3*, 3374–3379, doi:10.1016/B978-0-12-382219-2.00745-6.
85. Bjelke, J.R.; Christensen, J.; Nielsen, P.F.; Branner, S.; Kanstrup, A.B.; Wagtmann, N.; Rasmussen, H.B. Dipeptidyl peptidases 8 and 9: specificity and molecular characterization compared with dipeptidyl peptidase IV. *Biochem. J.* **2006**, *396*, 391, doi:10.1042/BJ20060079.
86. Edwards, D.R.; Handsley, M.M.; Pennington, C.J. The ADAM metalloproteinases. *Mol. Aspects Med.* **2008**, *29*, 258,

---

doi:10.1016/J.MAM.2008.08.001.

87. Rocha-Perugini, V.; Gordon-Alonso, M.; Sánchez-Madrid, F. Role of drebrin at the immunological synapse. *Adv. Exp. Med. Biol.* **2017**, *1006*, 271, doi:10.1007/978-4-431-56550-5\_15.
88. Caruso, J.A.; Akli, S.; Pagoon, L.; Hunt, K.K.; Keyomarsi, K. The serine protease inhibitor elafin maintains normal growth control by opposing the mitogenic effects of neutrophil elastase. *Oncogene* **2015**, *34*, 3556–3567, doi:10.1038/onc.2014.284.
89. Haroon, N.; Inman, R.D. Endoplasmic reticulum aminopeptidases: biology and pathogenic potential. *Nat. Rev. Rheumatol.* **2010**, *6*, 461–467, doi:10.1038/nrrheum.2010.85.
90. Torrent, M.; de la Torre, B.G.; Nogués, V.M.; Andreu, D.; Boix, E. Bactericidal and membrane disruption activities of the eosinophil cationic protein are largely retained in an N-terminal fragment. *Biochem. J.* **2009**, *421*, 425–434, doi:10.1042/BJ20082330.
91. Borelli, V.; Vita, F.; Shankar, S.; Soranzo, M.R.; Banfi, E.; Scialino, G.; Brochetta, C.; Zabucchi, G. Human eosinophil peroxidase induces surface alteration, killing, and lysis of *Mycobacterium tuberculosis*. *Infect. Immun.* **2003**, *71*, 605–613, doi:10.1128/IAI.71.2.605-613.2003.
92. McKown, R.L.; Coleman Frazier, E. V.; Zadrozny, K.K.; Deleault, A.M.; Raab, R.W.; Ryan, D.S.; Sia, R.K.; Lee, J.K.; Laurie, G.W. A cleavage-potentiated fragment of tear lactoferrin is bactericidal. *J. Biol. Chem.* **2014**, *289*, 22172–82, doi:10.1074/jbc.M114.570143.
93. Gong, Y.; Yu, Z.; Gao, Y.; Deng, L.; Wang, M.; Chen, Y.; Li, J.; Cheng, B. FABP4 inhibitors suppress inflammation and oxidative stress in murine and cell models of acute lung injury. *Biochem. Biophys. Res. Commun.* **2018**, *496*, 1115–1121, doi:10.1016/J.BBRC.2018.01.150.
94. Suojalehto, H.; Kinaret, P.; Kilpeläinen, M.; Toskala, E.; Ahonen, N.; Wolff, H.; Alenius, H.; Puustinen, A. Level of Fatty Acid Binding Protein 5 (FABP5) Is Increased in Sputum of Allergic Asthmatics and Links to Airway Remodeling and Inflammation. *PLoS One* **2015**, *10*, e0127003, doi:10.1371/JOURNAL.PONE.0127003.
95. Tollin, M.; Bergman, P.; Svenberg, T.; Jörnvall, H.; Gudmundsson, G.H.; Agerberth, B. Antimicrobial peptides in the first line defence of human colon mucosa. *Peptides* **2003**, *24*, 523–530, doi:10.1016/S0196-9781(03)00114-1.
96. Hogan, M.C.; Griffin, M.D.; Rossetti, S.; Torres, V.E.; Ward, C.J.; Harris, P.C. PKHD1, a homolog of the autosomal recessive polycystic kidney disease gene, encodes a receptor with inducible T lymphocyte expression. *Hum. Mol. Genet.* **2003**, *12*, 685–698, doi:10.1093/HMG/DDG068.
97. Hu, J.; Yan, J.; Rao, G.; Latha, K.; Overwijk, W.W.; Heimberger, A.B.; Li, S. THE DUALITY OF FGL2 - SECRETED IMMUNE CHECKPOINT REGULATOR VERSUS MEMBRANE-ASSOCIATED PROCOAGULANT: THERAPEUTIC POTENTIAL AND IMPLICATIONS. *Int. Rev. Immunol.* **2016**, *35*, 325, doi:10.3109/08830185.2014.956360.
98. Park, H.; Staehling, K.; Tsang, M.; Appleby, M.W.; Brunkow, M.E.; Margineantu, D.; Hockenbery, D.M.; Habib, T.; Liggitt, H.D.; Carlson, G.; et al. Disruption of *Fnrip1* reveals a metabolic checkpoint controlling B lymphocyte development. *Immunity* **2012**, *36*, 769–781, doi:10.1016/J.IMMUNI.2012.02.019.
99. Vankadari, N. Structure of Furin Protease Binding to SARS-CoV-2 Spike Glycoprotein and Implications for Potential Targets and Virulence. *J. Phys. Chem. Lett.* **2020**, *11*, 6655–6663, doi:10.1021/ACS.JPCLETT.0C01698/ASSET/IMAGES/LARGE/JZ0C01698\_0004.JPEG.
100. Da Silva, A.J.; Li, Z.; De Vera, C.; Canto, E.; Findell, P.; Rudd, C.E. Cloning of a novel T-cell protein FYB that binds FYN and SH2-domain-containing leukocyte protein 76 and modulates interleukin 2 production. *Proc. Natl. Acad. Sci. U. S. A.* **1997**, *94*, 7493–7498, doi:10.1073/PNAS.94.14.7493/ASSET/66521F97-7EE2-46E5-BD69-13D692DFFC9C/ASSETS/GRAPHIC/PQ1471400005.JPEG.
101. Matsuda, A.; Suzuki, Y.; Honda, G.; Muramatsu, S.; Matsuzaki, O.; Nagano, Y.; Doi, T.; Shimotohno, K.; Harada, T.; Nishida, E.; et al. Large-scale identification and characterization of human genes that activate NF- $\kappa$ B and MAPK signaling pathways. *Oncogene* **2003**, *22*, 3307–3318, doi:10.1038/SJ.ONC.1206406.



- 
102. Kubach, J.; Lutter, P.; Bopp, T.; Stoll, S.; Becker, C.; Huter, E.; Richter, C.; Weingarten, P.; Warger, T.; Knop, J.; et al. Human CD4<sup>+</sup>CD25<sup>+</sup> regulatory T cells: proteome analysis identifies galectin-10 as a novel marker essential for their anergy and suppressive function. *Blood* **2007**, *110*, 1550–1558, doi:10.1182/BLOOD-2007-01-069229.
103. Henderson, N.C.; Sethi, T. The regulation of inflammation by galectin-3. *Immunol. Rev.* **2009**, *230*, 160–171, doi:10.1111/J.1600-065X.2009.00794.X.
104. Ullrich, A.; Sures, I.; D'Egidio, M.; Jallal, B.; Powell, T.J.; Herbst, R.; Dreps, A.; Azam, M.; Rubinstein, M.; Natoli, C.; et al. The secreted tumor-associated antigen 90K is a potent immune stimulator. *J. Biol. Chem.* **1994**, *269*, 18401–18407.
105. Loimaranta, V.; Hepojoki, J.; Laaksoaho, O.; Pulliainen, A.T. Galectin-3-binding protein: A multitask glycoprotein with innate immunity functions in viral and bacterial infections. *J. Leukoc. Biol.* **2018**, *104*, 777–786, doi:10.1002/JLB.3VMR0118-036R.
106. Sewgobind, N. V.; Albers, S.; Pieters, R.J. Functions and Inhibition of Galectin-7, an Emerging Target in Cellular Pathophysiology. *Biomol.* **2021**, Vol. 11, Page 1720 **2021**, *11*, 1720, doi:10.3390/BIOM11111720.
107. Dai, S.-Y.; Nakagawa, R.; Itoh, A.; Murakami, H.; Kashio, Y.; Abe, H.; Katoh, S.; Kontani, K.; Kihara, M.; Zhang, S.-L.; et al. Galectin-9 Induces Maturation of Human Monocyte-Derived Dendritic Cells. *J. Immunol.* **2005**, *175*, 2974–2981, doi:10.4049/JIMMUNOL.175.5.2974.
108. Tang, J. Gastricsin. *Handb. Proteolytic Enzym.* **2013**, *1*, 49–54, doi:10.1016/B978-0-12-382219-2.00007-7.
109. Bucki, R.; Janmey, P.A. Interaction of the gelsolin-derived antibacterial PBP 10 peptide with lipid bilayers and cell membranes. *Antimicrob. Agents Chemother.* **2006**, *50*, 2932–2940, doi:10.1128/AAC.00134-06/ASSET/3D501A8A-20C0-47B3-89F7-E2014C50620B/ASSETS/GRAPHIC/ZAC0090659790006.JPG G.
110. Koistinen, H.; Koistinen, R.; Zhang, W.M.; Valmu, L.; Stenman, U.H. Nexin-1 inhibits the activity of human brain trypsin. *Neuroscience* **2009**, *160*, 97–102, doi:10.1016/J.NEUROSCIENCE.2009.02.042.
111. Gurney, M.E.; Apatoff, B.R.; Spear, G.T.; Baumel, M.J.; Antel, J.P.; Bania, M.B.; Reder, A.T. Neuroleukin: a lymphokine product of lectin-stimulated T cells. *Science* **1986**, *234*, 574–581, doi:10.1126/SCIENCE.3020690.
112. Slusher, B.S.; Rojas, C.; Coyle, J.T. Glutamate Carboxypeptidase II. *Handb. Proteolytic Enzym.* **2013**, *2*, 1620–1627, doi:10.1016/B978-0-12-382219-2.00368-9.
113. O-Wang, J.; Cooper, M.D.; Iturrioz, X.; Llorens-Cortes, C. Glutamyl Amino-peptidase. *Handb. Proteolytic Enzym.* **2013**, *1*, 410–414, doi:10.1016/B978-0-12-382219-2.00082-X.
114. Hughes, M.M.; McGettrick, A.F.; O'Neill, L.A.J. Glutathione and Glutathione Transferase Omega 1 as Key Posttranslational Regulators in Macrophages. *Microbiol. Spectr.* **2017**, *5*, doi:10.1128/MICROBIOLSPEC.MCHD-0044-2016.
115. Wu, Y.; Fan, Y.; Xue, B.; Luo, L.; Shen, J.; Zhang, S.; Jiang, Y.; Yin, Z. Human glutathione S-transferase P1-1 interacts with TRAF2 and regulates TRAF2–ASK1 signals. *Oncogene* **2006**, *25*, 5787–5800, doi:10.1038/sj.onc.1209576.
116. Gao, X.; Wang, X.; Pham, T.H.; Feuerbacher, L.A.; Lubos, M.L.; Huang, M.; Olsen, R.; Mushegian, A.; Slawson, C.; Hardwidge, P.R. NleB, a bacterial effector with glycosyltransferase activity, targets GAPDH function to inhibit NF-κB activation. *Cell Host Microbe* **2013**, *13*, 87–99, doi:10.1016/J.CHOM.2012.11.010.
117. Trapani, J.A. Granzymes: a family of lymphocyte granule serine proteases. *Genome Biol.* **2001**, *2*, reviews3014.1, doi:10.1186/GB-2001-2-12-REVIEWS3014.
118. Yang, D.; Chen, Q.; Hoover, D.M.; Staley, P.; Tucker, K.D.; Lubkowski, J.; Oppenheim, J.J. Many chemokines including CCL20/MIP-3α display antimicrobial activity. *J. Leukoc. Biol.* **2003**, *74*, 448–455, doi:10.1189/JLB.0103024.
119. Tripal, P.; Bauer, M.; Naschberger, E.; Mörtlinger, T.; Hohenadl, C.; Cornali, E.; Thureau, M.; Stürzl, M. Unique features of different members of the human guanylate-binding protein family. *J. Interferon Cytokine Res.* **2007**, *27*, 44–52, doi:10.1089/JIR.2007.0086.
120. Yu, P.; Li, Y.; Li, Y.; Miao, Z.; Peppelenbosch, M.P.; Pan, Q. Guanylate-binding protein 2 orchestrates innate immune responses against murine norovirus and is antagonized by the viral protein NS7. *J. Biol. Chem.* **2020**, *295*, 8036–8047,

---

doi:10.1074/JBC.RA120.013544.

121. Shenoy, A.R.; Wellington, D.A.; Kumar, P.; Kassa, H.; Booth, C.J.; Cresswell, P.; MacMicking, J.D. GBP5 promotes NLRP3 inflammasome assembly and immunity in mammals. *Science* **2012**, *336*, 481–485, doi:10.1126/SCIENCE.1217141.
122. MacKellar, M.; Vigerust, D.J. Role of Haptoglobin in Health and Disease: A Focus on Diabetes. *Clin. Diabetes* **2016**, *34*, 148, doi:10.2337/DIACLIN.34.3.148.
123. Drain, J.; Bishop, J.R.; Hajduk, S.L. Haptoglobin-related protein mediates trypanosome lytic factor binding to trypanosomes. *J. Biol. Chem.* **2001**, *276*, 30254–30260, doi:10.1074/JBC.M010198200.
124. Parrow, N.L.; Fleming, R.E.; Minnick, M.F. Sequestration and scavenging of iron in infection. *Infect. Immun.* **2013**, *81*, 3503–3514, doi:10.1128/IAI.00602-13.
125. A. Parish, C.; Jiang, H.; Tokiwa, Y.; Berova, N.; Nakanishi, K.; McCabe, D.; Zuckerman, W.; Ming Xia, M.; E. Gabay, J. Broad-spectrum antimicrobial activity of hemoglobin. *Bioorg. Med. Chem.* **2001**, *9*, 377–382, doi:10.1016/S0968-0896(00)00263-7.
126. Yin, X.; Li, X.; Chen, N.; Mu, L.; Wu, H.; Yang, Y.; Han, K.; Huang, Y.; Wang, B.; Jian, J.; et al. Hemopexin as an acute phase protein regulates the inflammatory response against bacterial infection of Nile tilapia (*Oreochromis niloticus*). *Int. J. Biol. Macromol.* **2021**, *187*, 166–178, doi:10.1016/J.IJBIOMAC.2021.07.109.
127. He, L.; Vicente, C.P.; Westrick, R.J.; Eitzman, D.T.; Tollefsen, D.M. Heparin cofactor II inhibits arterial thrombosis after endothelial injury. *J. Clin. Invest.* **2002**, *109*, 213, doi:10.1172/JCI13432.
128. Nemeth, E.; Tuttle, M.S.; Powelson, J.; Vaughn, M.D.; Donovan, A.; Ward, D.M.V.; Ganz, T.; Kaplan, J. Hepcidin regulates cellular iron efflux by binding to ferroportin and inducing its internalization. *Science* **2004**, *306*, 2090–2093, doi:10.1126/SCIENCE.1104742.
129. Park, C.H.; Valore, E. V.; Waring, A.J.; Ganz, T. Hepcidin, a urinary antimicrobial peptide synthesized in the liver. *J. Biol. Chem.* **2001**, *276*, 7806–7810, doi:10.1074/JBC.M008922200.
130. Wild, C.A.; Bergmann, C.; Fritz, G.; Schuler, P.; Hoffmann, T.K.; Lotfi, R.; Westendorf, A.; Brandau, S.; Lang, S. HMGB1 conveys immunosuppressive characteristics on regulatory and conventional T cells. *Int. Immunol.* **2012**, *24*, 485–494, doi:10.1093/INTIMM/DXS051.
131. Küchler, R.; Schroeder, B.O.; Jaeger, S.U.; Stange, E.F.; Wehkamp, J. Antimicrobial activity of high-mobility-group box 2: A new function to a well-known protein. *Antimicrob. Agents Chemother.* **2013**, *57*, 4782–4793, doi:10.1128/AAC.00805-13/SUPPL\_FILE/ZAC010132184SO1.PDF.
132. Wen, B.; Wei, Y. ting; Zhao, K. The role of high mobility group protein B3 (HMGB3) in tumor proliferation and drug resistance. *Mol. Cell. Biochem.* **2021**, *476*, 1729–1739, doi:10.1007/S11010-020-04015-Y.
133. Rydengård, V.; Olsson, A.K.; Mörgelin, M.; Schmidtchen, A. Histidine-rich glycoprotein exerts antibacterial activity. *FEBS J.* **2007**, *274*, 377–389, doi:10.1111/J.1742-4658.2006.05586.X.
134. Hoeksema, M.; Van Eijk, M.; Haagsman, H.P.; Hartshorn, K.L. Histones as mediators of host defense, inflammation and thrombosis. <http://dx.doi.org/10.2217/fmb.15.151> **2016**, *11*, 441–453, doi:10.2217/FMB.15.151.
135. Zhuo, L.; Kimata, K. Structure and function of inter-alpha-trypsin inhibitor heavy chains. *Connect. Tissue Res.* **2008**, *49*, 311–320, doi:10.1080/03008200802325458.
136. Zhou, X.; Liao, J.; Meyerdierks, A.; Feng, L.; Naumovski, L.; Böttger, E.C.; Omary, M.B. Interferon-alpha induces nmi-IFP35 heterodimeric complex formation that is affected by the phosphorylation of IFP35. *J. Biol. Chem.* **2000**, *275*, 21364–21371, doi:10.1074/JBC.M003177200.
137. Zhou, Z.; Wang, N.; Woodson, S.E.; Dong, Q.; Wang, J.; Liang, Y.; Rijnbrand, R.; Wei, L.; Nichols, J.E.; Guo, J.T.; et al. Antiviral activities of ISG20 in positive-strand RNA virus infections. *Virology* **2011**, *409*, 175–188, doi:10.1016/J.VIROL.2010.10.008.
138. Kalinska, M.; Meyer-Hoffert, U.; Kantyka, T.; Potempa, J. Kallikreins - the melting pot of activity and function. *Biochimie* **2016**, *122*, 270, doi:10.1016/J.BIOCHI.2015.09.023.

- 
139. Morizane, S.; Yamasaki, K.; Kabigting, F.D.; Gallo, R.L. Kallikrein expression and cathelicidin processing are independently controlled in keratinocytes by calcium, vitamin D(3), and retinoic acid. *J. Invest. Dermatol.* **2010**, *130*, 1297–1306, doi:10.1038/JID.2009.435.
140. Rapala-Kozik, M.; Karkowska, J.; Jacher, A.; Golda, A.; Barbasz, A.; Guevara-Lora, I.; Kozik, A. Kininogen adsorption to the cell surface of *Candida* spp. *Int. Immunopharmacol.* **2008**, *8*, 237–241, doi:10.1016/J.INTIMP.2007.07.005.
141. Ben Nasr, A.; Herwald, H.; Muller-Esterl, W.; Bjorck, L. Human kininogens interact with M protein, a bacterial surface protein and virulence determinant. *Biochem. J.* **1995**, *305*, 173–180, doi:10.1042/BJ3050173.
142. Smith, D.; Tikhonova, I.G.; Jewhurst, H.L.; Drysdale, O.C.; Dvořák, J.; Robinson, M.W.; Cwiklinski, K.; Dalton, J.P. Unexpected Activity of a Novel Kunitz-type Inhibitor: INHIBITION OF CYSTEINE PROTEASES BUT NOT SERINE PROTEASES. *J. Biol. Chem.* **2016**, *291*, 19220, doi:10.1074/JBC.M116.724344.
143. Wijkstrom-Frei, C.; El-Chemaly, S.; Ali-Rachedi, R.; Gerson, C.; Cobas, M.A.; Forteza, R.; Salathe, M.; Conner, G.E. Lactoperoxidase and human airway host defense. *Am. J. Respir. Cell Mol. Biol.* **2003**, *29*, 206–212, doi:10.1165/RCMB.2002-0152OC.
144. Dall, E.; Brandstetter, H. Structure and function of legumain in health and disease. *Biochimie* **2016**, *122*, 126–150, doi:10.1016/J.BIOCHI.2015.09.022.
145. Torriglia, A.; Martin, E.; Jaadane, I. The hidden side of SERPINB1/Leukocyte Elastase Inhibitor. *Semin. Cell Dev. Biol.* **2017**, *62*, 178–186, doi:10.1016/J.SEMCDB.2016.07.010.
146. Flo, T.H.; Smith, K.D.; Sato, S.; Rodriguez, D.J.; Holmes, M.A.; Strong, R.K.; Akira, S.; Aderem, A. Lipocalin 2 mediates an innate immune response to bacterial infection by sequestering iron. *Nature* **2004**, *432*, 917–21, doi:10.1038/nature03104.
147. Yang, J.; Goetz, D.; Li, J.Y.; Wang, W.; Mori, K.; Setlik, D.; Du, T.; Erdjument-Bromage, H.; Tempst, P.; Strong, R.; et al. An iron delivery pathway mediated by a lipocalin. *Mol. Cell* **2002**, *10*, 1045–56, doi:10.1016/s1097-2765(02)00710-4.
148. Meng, L.; Song, Z.; Liu, A.; Dahmen, U.; Yang, X.; Fang, H. Effects of Lipopolysaccharide-Binding Protein (LBP) Single Nucleotide Polymorphism (SNP) in Infections, Inflammatory Diseases, Metabolic Disorders and Cancers. *Front. Immunol.* **2021**, *12*, 2469, doi:10.3389/FIMMU.2021.681810/BIBTEX.
149. Krause, A.; Sillard, R.; Kleemeier, B.; Klüber, E.; Maronde, E.; Ramon Conejo-García, J.; Forssmann, W.G.; Schulz-Knappe, P.; Nehls, M.C.; Wattler, F.; et al. Isolation and biochemical characterization of LEAP-2, a novel blood peptide expressed in the liver. *Protein Sci.* **2003**, *12*, 143–152, doi:10.1110/PS.0213603.
150. Yang, D.; Chen, Q.; Hoover, D.M.; Staley, P.; Tucker, K.D.; Lubkowski, J.; Oppenheim, J.J. Many chemokines including CCL20/MIP-3 $\alpha$  display antimicrobial activity. *J. Leukoc. Biol.* **2003**, *74*, 448–455, doi:10.1189/JLB.0103024.
151. Oddo, M.; Calandra, T.; Bucala, R.; Meylan, P.R.A. Macrophage migration inhibitory factor reduces the growth of virulent *Mycobacterium tuberculosis* in human macrophages. *Infect. Immun.* **2005**, *73*, 3783–3786, doi:10.1128/IAI.73.6.3783-3786.2005.
152. Steiner, E.; Holzmann, K.; Pirker, C.; Elbling, L.; Micksche, M.; Sutterlüty, H.; Berger, W. The major vault protein is responsive to and interferes with interferon-gamma-mediated STAT1 signals. *J. Cell Sci.* **2006**, *119*, 459–469, doi:10.1242/JCS.02773.
153. Hassan, E.M.; Willmore, W.G.; McKay, B.C.; DeRosa, M.C. In vitro selections of mammaglobin A and mammaglobin B aptamers for the recognition of circulating breast tumor cells. *Sci. Rep.* **2017**, *7*, doi:10.1038/S41598-017-13751-Z.
154. Pejler, G.; Knight, S.D.; Henningsson, F.; Wernersson, S. Novel insights into the biological function of mast cell carboxypeptidase A. *Trends Immunol.* **2009**, *30*, 401–408, doi:10.1016/J.IT.2009.04.008.
155. Hong, J.-S.; Greenlee, K.J.; Pitchumani, R.; Lee, S.-H.; Song, L.; Shan, M.; Chang, S.H.; Park, P.W.; Dong, C.; Werb, Z.; et al. Dual protective mechanisms of matrix metalloproteinases 2 and 9 in immune defense against *Streptococcus pneumoniae*. *J. Immunol.* **2011**, *186*, 6427–6436, doi:10.4049/JIMMUNOL.1003449.
156. Kennard, M.L.; Richardson, D.R.; Gabathuler, R.; Ponka, P.; Jefferies, W.A. A novel iron uptake mechanism mediated by GPI-anchored human p97. *EMBO J.* **1995**, *14*, 4178, doi:10.1002/J.1460-2075.1995.TB00091.X.

- 
157. Wojtowicz-Praga, S.M.; Dickson, R.B.; Hawkins, M.J. Matrix metalloproteinase inhibitors. *Invest. New Drugs* **1997**, *15*, 61–75, doi:10.1023/A:1005722729132.
158. Sonobe, Y.; Li, H.; Jin, S.; Kishida, S.; Kadomatsu, K.; Takeuchi, H.; Mizuno, T.; Suzumura, A. Midkine Inhibits Inducible Regulatory T Cell Differentiation by Suppressing the Development of Tolerogenic Dendritic Cells. *J. Immunol.* **2012**, *188*, 2602–2611, doi:10.4049/JIMMUNOL.1102346.
159. Serrador, J.M.; Nieto, M.; Alonso-Lebrero, J.L.; del Pozo, M.A.; Calvo, J.; Furthmayr, H.; Schwartz-Albiez, R.; Lozano, F.; González-Amaro, R.; Sánchez-Mateos, P.; et al. CD43 Interacts With Moesin and Ezrin and Regulates Its Redistribution to the Uropods of T Lymphocytes at the Cell-Cell Contacts. *Blood* **1998**, *91*, 4632–4644, doi:10.1182/BLOOD.V91.12.4632.
160. Linden, S.K.; Sutton, P.; Karlsson, N.G.; Korolik, V.; McGuckin, M.A. Mucins in the mucosal barrier to infection. *Mucosal Immunol.* **2008**, *1*, 183–197, doi:10.1038/mi.2008.5.
161. Crisford, H.; Sapey, E.; Stockley, R.A. Proteinase 3; a potential target in chronic obstructive pulmonary disease and other chronic inflammatory diseases. *Respir. Res.* **2018**, *19*, 1–10, doi:10.1186/S12931-018-0883-Z.
162. Nauseef, W.M. Myeloperoxidase in human neutrophil host defence. *Cell. Microbiol.* **2014**, *16*, 1146–1155, doi:10.1111/CMI.12312.
163. Mak, P.; Wójcik, K.; Silberring, J.; Dubin, A. Antimicrobial peptides derived from heme-containing proteins: hemocidins. *Antonie Van Leeuwenhoek* **2000**, *77*, 197–207, doi:10.1023/A:1002081605784.
164. Liu, C.; Xu, Z.; Gupta, D.; Dziarski, R. Peptidoglycan recognition proteins: a novel family of four human innate immunity pattern recognition molecules. *J. Biol. Chem.* **2001**, *276*, 34686–34694, doi:10.1074/JBC.M105566200.
165. Nalivaeva, N.N.; Turner, A.J. Neprilysin. *Handb. Proteolytic Enzym.* **2013**, *1*, 612–619, doi:10.1016/B978-0-12-382219-2.00127-7.
166. Manicone, A.M.; McGuire, J.K. Matrix metalloproteinases as modulators of inflammation. *Semin. Cell Dev. Biol.* **2008**, *19*, 34–41, doi:10.1016/J.SEMCDB.2007.07.003.
167. Korkmaz, B.; Gauthier, F. Elastase-2/Leukocyte Elastase. *Handb. Proteolytic Enzym.* **2013**, *3*, 2653–2661, doi:10.1016/B978-0-12-382219-2.00587-1.
168. Romacho, T.; Villalobos, L.A.; Cercas, E.; Carraro, R.; Sánchez-Ferrer, C.F.; Peiró, C. Visfatin as a Novel Mediator Released by Inflamed Human Endothelial Cells. *PLoS One* **2013**, *8*, e78283, doi:10.1371/JOURNAL.PONE.0078283.
169. Feng, Y.; Huang, N.; Wu, Q.; Wang, B. HMGN2: a novel antimicrobial effector molecule of human mononuclear leukocytes? *J. Leukoc. Biol.* **2005**, *78*, 1136–1141, doi:10.1189/JLB.0505280.
170. Sorrentino, S. The eight human “canonical” ribonucleases: Molecular diversity, catalytic properties, and special biological actions of the enzyme proteins. *FEBS Lett.* **2010**, *584*, 2194–2200, doi:10.1016/J.FEBSLET.2010.04.018.
171. Wisner, A.; Dufour, E.; Messaoudi, M.; Nejdi, A.; Marcel, A.; Ungeheuer, M.N.; Rougeot, C. Human Opiorphin, a natural antinociceptive modulator of opioid-dependent pathways. *Proc. Natl. Acad. Sci. U. S. A.* **2006**, *103*, 17979–17984, doi:10.1073/PNAS.0605865103.
172. Regn, M.; Lagerbauer, B.; Jentzsch, C.; Ramanujam, D.; Ahles, A.; Sichler, S.; Calzada-Wack, J.; Koenen, R.R.; Braun, A.; Nieswandt, B.; et al. Peptidase inhibitor 16 is a membrane-tethered regulator of chemerin processing in the myocardium. *J. Mol. Cell. Cardiol.* **2016**, *99*, 57–64, doi:10.1016/J.YJMCC.2016.08.010.
173. Kang, D.; Liu, G.; Lundström, A.; Gelius, E.; Steiner, H. A peptidoglycan recognition protein in innate immunity conserved from insects to humans. *Proc. Natl. Acad. Sci. U. S. A.* **1998**, *95*, 10078–10082, doi:10.1073/PNAS.95.17.10078.
174. Ando, K.; Hiroishi, K.; Kaneko, T.; Moriyama, T.; Muto, Y.; Kayagaki, N.; Yagita, H.; Okumura, K.; Imaewari, M. Perforin, Fas/Fas ligand, and TNF-alpha pathways as specific and bystander killing mechanisms of hepatitis C virus-specific human CTL. *J. Immunol.* **1997**, *158*.
175. Xu, S.; Zhao, L.; Larsson, A.; Venge, P. The identification of a phospholipase B precursor in human neutrophils. *FEBS J.* **2009**, *276*, 175–186, doi:10.1111/J.1742-4658.2008.06771.X.
176. Franco-Chuaire, M.L.; Ramírez-Clavijo, S.; Chuaire-Noack, L. Pigment epithelium-derived factor: clinical significance in

- estrogen-dependent tissues and its potential in cancer therapy. *Iran. J. Basic Med. Sci.* **2015**, *18*, 837.
177. Meijers, J.C.M.; Herwald, H. Protein C inhibitor. *Semin. Thromb. Hemost.* **2011**, *37*, 349–354, doi:10.1055/S-0031-1276583.
178. Lu, X.; Kugadas, A.; Smith-Page, K.; Lamb, J.; Lin, T.; Ru, Y.; Morley, S.C.; Fichorova, R.; Mittal, S.K.; Chauhan, S.K.; et al. Neutrophil L-Plastin Controls Ocular Paucibacterality and Susceptibility to Keratitis. *Front. Immunol.* **2020**, *11*, 547, doi:10.3389/FIMMU.2020.00547/BIBTEX.
179. Cousineau, S.E.; Rheault, M.; Sagan, S.M. Poly(rC)-Binding Protein 1 Limits Hepatitis C Virus Virion Assembly and Secretion. *Viruses* **2022**, Vol. 14, Page 291 **2022**, *14*, 291, doi:10.3390/V14020291.
180. Zell, R.; Ihle, Y.; Seitz, S.; Gündel, U.; Wutzler, P.; Görlach, M. Poly(rC)-binding protein 2 interacts with the oligo(rC) tract of coxsackievirus B3. *Biochem. Biophys. Res. Commun.* **2008**, *366*, 917–921, doi:10.1016/J.BBRC.2007.12.038.
181. JENSEN, P.E.H.; STIGBRAND, T. Differences in the proteinase inhibition mechanism of human alpha 2-macroglobulin and pregnancy zone protein. *Eur. J. Biochem.* **1992**, *210*, 1071–1077, doi:10.1111/J.1432-1033.1992.TB17513.X.
182. Wong, L.Y.F.; Cheung, B.M.Y.; Li, Y.Y.; Tang, F. Adrenomedullin is both proinflammatory and antiinflammatory: its effects on gene expression and secretion of cytokines and macrophage migration inhibitory factor in NR8383 macrophage cell line. *Endocrinology* **2005**, *146*, 1321–1327, doi:10.1210/EN.2004-1080.
183. Allaker, R.P.; Grosvenor, P.W.; McAnerney, D.C.; Sheehan, B.E.; Srikanta, B.H.; Pell, K.; Kapas, S. Mechanisms of adrenomedullin antimicrobial action. *Peptides* **2006**, *27*, 661–666, doi:10.1016/J.PEPTIDES.2005.09.003.
184. Van Damme, P.; Van Hoecke, A.; Lambrechts, D.; Vanacker, P.; Bogaert, E.; Van Swieten, J.; Carmeliet, P.; Van Den Bosch, L.; Robberecht, W. Progranulin functions as a neurotrophic factor to regulate neurite outgrowth and enhance neuronal survival. *J. Cell Biol.* **2008**, *181*, 37–41, doi:10.1083/JCB.200712039.
185. Caputo, E.; Camarca, A.; Moharram, R.; Tornatore, P.; Thatcher, B.; Guardiola, J.; Martin, B.M. Structural study of GCDFP-15/gp17 in disease versus physiological conditions using a proteomic approach. *Biochemistry* **2003**, *42*, 6169–78, doi:10.1021/bi034038a.
186. Hassan, M.I.; Waheed, A.; Yadav, S.; Singh, T.P.; Ahmad, F. Prolactin inducible protein in cancer, fertility and immunoregulation: structure, function and its clinical implications. *Cell. Mol. Life Sci.* **2009**, *66*, 447–59, doi:10.1007/s00018-008-8463-x.
187. Russell, M.W.; Bobek, L.A.; Brock, J.H.; Hajishengallis, G.; Tenovuo, J. Innate Humoral Defense Factors. *Mucosal Immunol.* **2005**, *73*, doi:10.1016/B978-012491543-5/50009-7.
188. Männistö, P.T.; García-Horsman, J.A. Mechanism of action of Prolyl oligopeptidase (PREP) in degenerative brain diseases: Has peptidase activity only a modulatory role on the interactions of PREP with proteins? *Front. Aging Neurosci.* **2017**, *9*, 27, doi:10.3389/FNAGI.2017.00027/BIBTEX.
189. Cutuli, M.; Cristiani, S.; Lipton, J.M.; Catania, A. Antimicrobial effects of  $\alpha$ -MSH peptides. *J. Leukoc. Biol.* **2000**, *67*, 233–239, doi:10.1002/JLB.67.2.233.
190. Kimura, M.; Shindo, M.; Moriizumi, T.; Tagawa, N.; Fujinami, A.; Kato, I.; Uchida, Y. Salusin- $\beta$ , an antimicrobially active peptide against Gram-positive bacteria. *Chem. Pharm. Bull. (Tokyo)*. **2014**, *62*, 586–590, doi:10.1248/CPB.C14-00103.
191. Darmoise, A.; Maschmeyer, P.; Winau, F. The Immunological Functions of Saposins. *Adv. Immunol.* **2010**, *105*, 25, doi:10.1016/S0065-2776(10)05002-9.
192. Tong, Z.; Illek, B.; Bhagwandin, V.J.; Verghese, G.M.; Caughey, G.H. Prostaticin, a membrane-anchored serine peptidase, regulates sodium currents in JME/CF15 cells, a cystic fibrosis airway epithelial cell line. *Am. J. Physiol. Lung Cell. Mol. Physiol.* **2004**, *287*, doi:10.1152/AJPLUNG.00160.2004.
193. Lord, M.S.; Melrose, J.; Day, A.J.; Whitelock, J.M. The Inter- $\alpha$ -Trypsin Inhibitor Family: Versatile Molecules in Biology and Pathology. *J. Histochem. Cytochem.* **2020**, *68*, 907–927, doi:10.1369/0022155420940067.
194. Simon, A.; Kullberg, B.J.; Tripet, B.; Boerman, O.C.; Zeeuwen, P.; Van Der Ven-Jongekrijg, J.; Verweij, P.; Schalkwijk, J.; Hodges, R.; Van Der Meer, J.W.M.; et al. Drosomycin-like defensin, a human homologue of *Drosophila melanogaster* drosomycin with antifungal activity. *Antimicrob. Agents Chemother.* **2008**, *52*, 1407–1412, doi:10.1128/AAC.00155-07.

195. Yu, J.; Lu, Y.; Li, Y.; Xiao, L.; Xing, Y.; Li, Y.; Wu, L. Role of S100A1 in hypoxia-induced inflammatory response in cardiomyocytes via TLR4/ROS/NF- $\kappa$ B pathway. *J. Pharm. Pharmacol.* **2015**, *67*, 1240–1250, doi:10.1111/JPHP.12415.
196. Xia, C.; Braunstein, Z.; Toomey, A.C.; Zhong, J.; Rao, X. S100 proteins as an important regulator of macrophage inflammation. *Front. Immunol.* **2018**, *8*, 1908, doi:10.3389/FIMMU.2017.01908/BIBTEX.
197. Zhang, L.; Zhu, T.; Miao, H.; Liang, B. The Calcium Binding Protein S100A11 and Its Roles in Diseases. *Front. cell Dev. Biol.* **2021**, *9*, doi:10.3389/FCELL.2021.693262.
198. Carreira, C.M.; LaVallee, T.M.; Tarantini, F.; Jackson, A.; Lathrop, J.T.; Hampton, B.; Burgess, W.H.; Maciag, T. S100A13 is involved in the regulation of fibroblast growth factor-1 and p40 synaptotagmin-1 release in vitro. *J. Biol. Chem.* **1998**, *273*, 22224–22231, doi:10.1074/JBC.273.35.22224.
199. Colón, K.; Speicher, D.W.; Smith, P.; Taylor, M.; Metzger, D.S.; Montaner, L.J.; Tomescu, C. S100A14 is increased in activated NK cells and plasma of HIV-Exposed seronegative people who inject drugs and promotes monocyte-NK crosstalk. *J. Acquir. Immune Defic. Syndr.* **2019**, *80*, 234–241, doi:10.1097/QAI.0000000000001911.
200. Donato, R. Intracellular and extracellular roles of S100 proteins. *Microsc. Res. Tech.* **2003**, *60*, 540–551, doi:10.1002/JEMT.10296.
201. Wu, Y. yuan; Li, X. feng; Wu, S.; Niu, X. ni; Yin, S. qin; Huang, C.; Li, J. Role of the S100 protein family in rheumatoid arthritis. *Arthritis Res. Ther.* **2022**, *24*, doi:10.1186/S13075-022-02727-8.
202. Clauss, A.; Persson, M.; Lilja, H.; Lundwall, Å. Three genes expressing Kunitz domains in the epididymis are related to genes of WFDC-type protease inhibitors and semen coagulum proteins in spite of lacking similarity between their protein products. *BMC Biochem.* **2011**, *12*, 1–13, doi:10.1186/1471-2091-12-55/TABLES/4.
203. Constam, D.B.; Tobler, A.R.; Rensing-Ehl, A.; Kemler, I.; Hersh, L.B.; Fontana, A. Puromycin-sensitive Aminopeptidase: SEQUENCE ANALYSIS, EXPRESSION, AND FUNCTIONAL CHARACTERIZATION. *J. Biol. Chem.* **1995**, *270*, 26931–26939, doi:10.1074/JBC.270.45.26931.
204. Takada, N.; Sanda, T.; Okamoto, H.; Yang, J.-P.; Asamitsu, K.; Sarol, L.; Kimura, G.; Uranishi, H.; Tetsuka, T.; Okamoto, T. RelA-Associated Inhibitor Blocks Transcription of Human Immunodeficiency Virus Type 1 by Inhibiting NF- $\kappa$ B and Sp1 Actions. *J. Virol.* **2002**, *76*, 8019–8030, doi:10.1128/JVI.76.16.8019-8030.2002/ASSET/7564AA0A-E691-4631-8477-58145AFD16A2/ASSETS/GRAPHIC/JV1620176006.JPEG.
205. Golda, M.; Mótyán, J.A.; Nagy, K.; Matúz, K.; Nagy, T.; Tózsér, J. Biochemical Characterization of Human Retroviral-Like Aspartic Protease 1 (ASPRV1). *Biomolecules* **2020**, *10*, 1–26, doi:10.3390/BIOM10071004.
206. Campbell, G.; Swamynathan, S.; Tiwari, A.; Swamynathan, S.K. The secreted Ly-6/uPAR related protein-1 (SLURP1) stabilizes epithelial cell junctions and suppresses TNF- $\alpha$ -induced cytokine production. *Biochem. Biophys. Res. Commun.* **2019**, *517*, 729–734, doi:10.1016/J.BBRC.2019.07.123.
207. Lu, X.; Wang, N.; Long, X.B.; You, X.J.; Cui, Y.H.; Liu, Z. The cytokine-driven regulation of secretoglobins in normal human upper airway and their expression, particularly that of uteroglobin-related protein 1, in chronic rhinosinusitis. *Respir. Res.* **2011**, *12*, 1–10, doi:10.1186/1465-9921-12-28/TABLES/3.
208. Yamada, A.; Suzuki, D.; Miyazono, A.; Oshima, K.; Kamiya, A.; Zhao, B.; Takami, M.; Donnelly, R.P.; Itabe, H.; Yamamoto, M.; et al. IFN-gamma down-regulates Secretoglobin 3A1 gene expression. *Biochem. Biophys. Res. Commun.* **2009**, *379*, 964–968, doi:10.1016/J.BBRC.2008.12.187.
209. De Lamirande, E. Semenogelin, the main protein of the human semen coagulum, regulates sperm function. *Semin. Thromb. Hemost.* **2007**, *33*, 60–68, doi:10.1055/S-2006-958463.
210. Zhao, H.; Lee, W.H.; Shen, J.H.; Li, H.; Zhang, Y. Identification of novel semenogelin I-derived antimicrobial peptide from liquefied human seminal plasma. *Peptides* **2008**, *29*, 505–511, doi:10.1016/J.PEPTIDES.2008.01.009.
211. Bourgeon, F.; Evrard, B.; Brillard-Bourdet, M.; Colleu, D.; Jégou, B.; Pineau, C. Involvement of semenogelin-derived peptides in the antibacterial activity of human seminal plasma. *Biol. Reprod.* **2004**, *70*, 768–774,

---

doi:10.1095/BIOLREPROD.103.022533.

212. Owen, C.A. SERINE PROTEINASES. *Encycl. Respir. Med. Four-Volume Set* **2006**, 1–10, doi:10.1016/B0-12-370879-6/00264-7.
213. Liao, C.; Wang, Q.; An, J.; Zhang, M.; Chen, J.; Li, X.; Xiao, L.; Wang, J.; Long, Q.; Liu, J.; et al. SPINKs in Tumors: Potential Therapeutic Targets. *Front. Oncol.* **2022**, *12*, 225, doi:10.3389/FONC.2022.833741/BIBTEX.
214. Von Bonsdorff, L.; Sahlstedt, L.; Ebeling, F.; Ruutu, T.; Parkkinen, J. Apotransferrin administration prevents growth of *Staphylococcus epidermidis* in serum of stem cell transplant patients by binding of free iron. *FEMS Immunol. Med. Microbiol.* **2003**, *37*, 45–51, doi:10.1016/S0928-8244(03)00109-3.
215. Law, R.H.P.; Zhang, Q.; McGowan, S.; Buckle, A.M.; Silverman, G.A.; Wong, W.; Rosado, C.J.; Langendorf, C.G.; Pike, R.N.; Bird, P.I.; et al. An overview of the serpin superfamily. *Genome Biol.* **2006**, *7*, 1–11, doi:10.1186/GB-2006-7-5-216/FIGURES/3.
216. Gatt, M.E.; Urieli-Shoval, S.; Preciado-Patt, L.; Fridkin, M.; Calco, S.; Azar, Y.; Matzner, Y. Effect of serum amyloid A on selected in vitro functions of isolated human neutrophils. *J. Lab. Clin. Med.* **1998**, *132*, 414–420, doi:10.1016/S0022-2143(98)90112-3.
217. Job, E.R.; Bottazzi, B.; Gilbertson, B.; Edenborough, K.M.; Brown, L.E.; Mantovani, A.; Brooks, A.G.; Reading, P.C. Serum amyloid P is a sialylated glycoprotein inhibitor of influenza A viruses. *PLoS One* **2013**, *8*, doi:10.1371/JOURNAL.PONE.0059623.
218. Zannettino, A.C.W.; Bühring, H.-J.; Niuitta, S.; Watt, S.M.; Benton, M.A.; Simmons, P.J. The Sialomucin CD164 (MGC-24v) Is an Adhesive Glycoprotein Expressed by Human Hematopoietic Progenitors and Bone Marrow Stromal Cells That Serves as a Potent Negative Regulator of Hematopoiesis. *Blood* **1998**, *92*, 2613–2628, doi:10.1182/BLOOD.V92.8.2613.
219. Philley, J. V.; Kannan, A.; Dasgupta, S. MDA-9/Syntenin Control. *J. Cell. Physiol.* **2016**, *231*, 545–550, doi:10.1002/JCP.25136.
220. Fiscella, M.; Perry, J.W.; Teng, B.; Bloom, M.; Zhang, C.; Leung, K.; Pukac, L.; Florence, K.; Concepcion, A.; Liu, B.; et al. TIP, a T-cell factor identified using high-throughput screening increases survival in a graft-versus-host disease model. *Nat. Biotechnol.* **2003**, *21*, 302–307, doi:10.1038/NBT797.
221. Jeong, W.; Chang, T.S.; Boja, E.S.; Fales, H.M.; Rhee, S.G. Roles of TRP14, a thioredoxin-related protein in tumor necrosis factor- $\alpha$  signaling pathways. *J. Biol. Chem.* **2004**, *279*, 3151–3159, doi:10.1074/JBC.M307959200.
222. Carion, T.W.; Ebrahim, A.S.; Alluri, S.; Ebrahim, T.; Parker, T.; Burns, J.; Sosne, G.; Berger, E.A. Antimicrobial Effects of Thymosin Beta-4 and Ciprofloxacin Adjunctive Therapy in *Pseudomonas aeruginosa* Induced Keratitis. *Int. J. Mol. Sci.* **2020**, *21*, Page 6840 **2020**, *21*, 6840, doi:10.3390/IJMS21186840.
223. Jirasakuldech, B.; Schussler, G.C.; Yap, M.G.; Drew, H.; Josephson, A.; Michl, J. A characteristic serpin cleavage product of thyroxine-binding globulin appears in sepsis sera. *J. Clin. Endocrinol. Metab.* **2000**, *85*, 3996–3999, doi:10.1210/JCEM.85.11.6966.
224. Zhang, G.; Ghosh, S. Negative regulation of toll-like receptor-mediated signaling by Tollip. *J. Biol. Chem.* **2002**, *277*, 7059–7065, doi:10.1074/JBC.M109537200.
225. Nicorescu, I.; Timmers, N.; Stroes, E.; Bernelot, S.; Bahjat, M.; Abduzhamalova, N.; Tereschenko, A.; Masenko, V.; Merkulov, E.; Naumov, V. Transgelin as a promising marker for the study of immune status in atherosclerosis. *Atherosclerosis* **2018**, *275*, e109–e110, doi:10.1016/J.ATHEROSCLEROSIS.2018.06.306.
226. Kim, H.R.; Park, J.S.; Karabulut, H.; Yasmin, F.; Jun, C.D. Transgelin-2: A Double-Edged Sword in Immunity and Cancer Metastasis. *Front. Cell Dev. Biol.* **2021**, *9*, 825, doi:10.3389/FCELL.2021.606149/BIBTEX.
227. Fernandez, C.; Burgos, A.; Morales, D.; Rosales-Rojas, R.; Canelo, J.; Vergara-Jaque, A.; Vieira, G.V.; da Silva, R.A.A.; Sales, K.U.; Conboy, M.J.; et al. TMPRSS11a is a novel age-altered, tissue specific regulator of migration and wound healing. *FASEB J.* **2021**, *35*, doi:10.1096/FJ.202002253RRR.
228. Menou, A.; Duitman, J.; Flajolet, P.; Sallenave, J.M.; Mailleux, A.A.; Crestani, B. Human airway trypsin-like protease, a serine protease involved in respiratory diseases. *Am. J. Physiol. Lung Cell. Mol. Physiol.* **2017**, *312*, L657–L668, doi:10.1152/AJPLUNG.00509.2016.
229. Vilorio, C.G.; Peinado, J.R.; Astudillo, A.; García-Suárez, O.; González, M. V.; Suárez, C.; Cal, S. Human DESC1 serine

- protease confers tumorigenic properties to MDCK cells and it is upregulated in tumours of different origin. *Br. J. Cancer* **2007**, *97*, 201–209, doi:10.1038/sj.bjc.6603856.
230. Diao, F.; Li, S.; Tian, Y.; Zhang, M.; Xu, L.G.; Zhang, Y.; Wang, R.P.; Chen, D.; Zhai, Z.; Zhong, B.; et al. Negative regulation of MDA5- but not RIG-I-mediated innate antiviral signaling by the dihydroxyacetone kinase. *Proc. Natl. Acad. Sci. U. S. A.* **2007**, *104*, 11706–11711, doi:10.1073/PNAS.0700544104/SUPPL\_FILE/00544FIG8.PDF.
231. Sohar, I.; Sleat, D.E.; Lobel, P. Tripeptidyl Peptidase I. *Handb. Proteolytic Enzym.* **2013**, *3*, 3350–3356, doi:10.1016/B978-0-12-382219-2.00740-7.
232. Tomkinson, B. Tripeptidyl-peptidase II: Update on an oldie that still counts. *Biochimie* **2019**, *166*, 27–37, doi:10.1016/J.BIOCHI.2019.05.012.
233. Ghosh, D.; Porter, E.; Shen, B.; Lee, S.K.; Wilk, D.; Drazba, J.; Yadav, S.P.; Crabb, J.W.; Ganz, T.; Bevins, C.L. Paneth cell trypsin is the processing enzyme for human defensin-5. *Nat. Immunol.* **2002**, *3*, 583–590, doi:10.1038/NI797.
234. Katona, G.; Berglund, G.I.; Hajdu, J.; Gráf, L.; Szilágyi, L. Crystal structure reveals basis for the inhibitor resistance of human brain trypsin. *J. Mol. Biol.* **2002**, *315*, 1209–1218, doi:10.1006/JMBI.2001.5305.
235. Simmons, M.A. Trypsin. *xPharm Compr. Pharmacol. Ref.* **2007**, 1–3, doi:10.1016/B978-008055232-3.62820-X.
236. Devuyt, O.; Olinger, E.; Rampoldi, L. Uromodulin: from physiology to rare and complex kidney disorders. *Nat. Rev. Nephrol.* **2017**, *13*, 525–544, doi:10.1038/nrneph.2017.101.
237. Kukulski, W. A glycoprotein in urine binds bacteria and blocks infections. *Science (80-. ).* **2020**, *369*, 917–918, doi:10.1126/SCIENCE.ABD7124/ASSET/9EF19817-5E70-44B0-935D-17AFF4C91727/ASSETS/GRAPHIC/369\_917\_F1.JPEG.
238. Janicova, A.; Becker, N.; Xu, B.; Wutzler, S.; Vollrath, J.T.; Hildebrand, F.; Ehnert, S.; Marzi, I.; Störmann, P.; Relja, B. Endogenous Uteroglobin as Intrinsic Anti-inflammatory Signal Modulates Monocyte and Macrophage Subsets Distribution Upon Sepsis Induced Lung Injury. *Front. Immunol.* **2019**, *10*, doi:10.3389/FIMMU.2019.02276.
239. Kew, R.R. The Vitamin D binding protein and inflammatory injury: A mediator or sentinel of tissue damage? *Front. Endocrinol. (Lausanne)*. **2019**, *10*, 470, doi:10.3389/FENDO.2019.00470/BIBTEX.
240. Lundwall, Å.; Clauss, A. Genes encoding WFDC- and Kunitz-type protease inhibitor domains: are they related? *Biochem. Soc. Trans.* **2011**, *39*, 1398–1402, doi:10.1042/BST0391398.
241. Ito, K.; Nakajima, Y.; Yoshimoto, T. Prolyl Aminopeptidase. *Handb. Proteolytic Enzym.* **2013**, *3*, 3438–3443, doi:10.1016/B978-0-12-382219-2.00760-2.
242. Kodama, H. Xaa-Pro Dipeptidase (Eukaryotes). *Handb. Proteolytic Enzym.* **2013**, *2*, 1507–1514, doi:10.1016/B978-0-12-382219-2.00339-2.
243. Hassan, M.I.; Waheed, A.; Yadav, S.; Singh, T.P.; Ahmad, F. Zinc alpha 2-glycoprotein: a multidisciplinary protein. *Mol. Cancer Res.* **2008**, *6*, 892–906, doi:10.1158/1541-7786.MCR-07-2195.
244. Bergström, J.H.; Birchenough, G.M.H.; Katona, G.; Schroeder, B.O.; Schütte, A.; Ermund, A.; Johansson, M.E.V.; Hansson, G.C. Gram-positive bacteria are held at a distance in the colon mucus by the lectin-like protein ZG16. *Proc. Natl. Acad. Sci. U. S. A.* **2016**, *113*, 13833–13838, doi:10.1073/PNAS.1611400113/SUPPL\_FILE/PNAS.1611400113.SM07.AVI.
245. Costa-da-Silva, A.C.; Aure, M.H.; Dodge, J.; Martin, D.; Dhamala, S.; Cho, M.; Rose, J.J.; Bassim, C.W.; Ambatipudi, K.; Hakim, F.T.; et al. Salivary ZG16B expression loss follows exocrine gland dysfunction related to oral chronic graft-versus-host disease. *iScience* **2021**, *25*, doi:10.1016/J.ISCI.2021.103592.
246. Oppenheim, F.G.; Xu, T.; McMillian, F.M.; Levitz, S.M.; Diamond, R.D.; Offner, G.D.; Troxler, R.F. Histatins, a novel family of histidine-rich proteins in human parotid secretion. Isolation, characterization, primary structure, and fungistatic effects on *Candida albicans*. *J. Biol. Chem.* **1988**, *263*, 7472–7477, doi:10.1016/S0021-9258(18)68522-9.
247. Chernyavsky, A.I.; Galitovskiy, V.; Shchepotin, I.B.; Grando, S.A. Anti-inflammatory effects of the nicotinic peptides SLURP-1 and SLURP-2 on human intestinal epithelial cells and immunocytes. *Biomed Res. Int.* **2014**, *2014*, doi:10.1155/2014/609086.
248. Updegraff, B.L.; Zhou, X.; Guo, Y.; Padanab, M.S.; Chen, P.H.; Yang, C.; Sudderth, J.; Rodriguez-Tirado, C.; Girard, L.;



- 
- Minna, J.D.; et al. Transmembrane Protease TMPRSS11B Promotes Lung Cancer Growth by Enhancing Lactate Export and Glycolytic Metabolism. *Cell Rep.* **2018**, *25*, 2223, doi:10.1016/J.CELREP.2018.10.100.
249. Orysiak, J.; Lenczowska, M.J.; Multanowski, B.M. Expression of SCGB1C1 gene as a potential marker of susceptibility to upper respiratory tract infections in elite athletes - a pilot study. *Biol. Sport* **2016**, *33*, 107–110, doi:10.5604/20831862.1196510.
250. Atzei, P.; Gargan, S.; Curran, N.; Moynagh, P.N. Cactin targets the MHC class III protein IkappaB-like (IkappaBL) and inhibits NF-kappaB and interferon-regulatory factor signaling pathways. *J. Biol. Chem.* **2010**, *285*, 36804–36817, doi:10.1074/JBC.M110.139113.
251. Fricker, L.D. Carboxypeptidase Z. *Handb. Proteolytic Enzym. Second Ed.* **2004**, *1*, 844–845, doi:10.1016/B978-0-12-079611-3.50257-3.
252. Tasco'n, J.D.; Adrian, J.; Kopp, K.; Scholz, P.; Tschan, M.P.; Kuespert, K.; Hauck, C.R. The granulocyte orphan receptor CEACAM4 is able to trigger phagocytosis of bacteria. *J. Leukoc. Biol.* **2015**, *97*, 521–531, doi:10.1189/JLB.2AB0813-449RR.
253. Sturm, A.; Lensch, M.; André, S.; Kaltner, H.; Wiedenmann, B.; Rosewicz, S.; Dignass, A.U.; Gabius, H.-J. Human Galectin-2: Novel Inducer of T Cell Apoptosis with Distinct Profile of Caspase Activation. *J. Immunol.* **2004**, *173*, 3825–3837, doi:10.4049/JIMMUNOL.173.6.3825.
254. El Karim, I.A.; Linden, G.J.; Orr, D.F.; Lundy, F.T. Antimicrobial activity of neuropeptides against a range of micro-organisms from skin, oral, respiratory and gastrointestinal tract sites. *J. Neuroimmunol.* **2008**, *200*, 11–16, doi:10.1016/J.JNEUROIM.2008.05.014.
255. Yenugu, S.; Hamil, K.G.; French, F.S.; Hall, S.H. Antimicrobial actions of human and macaque sperm associated antigen (SPAG) 11 isoforms: influence of the N-terminal peptide. *Mol. Cell. Biochem.* **2006**, *284*, 25–37, doi:10.1007/S11010-005-9009-2.
